# Supplementary material
Source: PubMed Central journal article supplement (PMC2562213)

## SUPPORTING INFORMATION

### An Experimental and Computational Approach to Defining Structure/Reactivity Relationships for Intramolecular Addition Reactions to Bicyclic Epoxonium Ions

*Shuangyi Wan, Hakan Gunaydin, K. N. Houk, and Paul E. Floreancig*

*Department of Chemistry and Biochemistry*

*University of California*

*Los Angeles, CA 90095*

*and*

*Department of Chemistry*

*University of Pittsburgh*

*Pittsburgh, PA 15260*

**General Experimental** Proton ( $^1\text{H}$  NMR) and carbon ( $^{13}\text{C}$  NMR) nuclear magnetic resonance spectra were recorded on a Bruker Avance 300 spectrometer at 300 MHz and 75 MHz respectively, a Bruker Avance 500 spectrometer at 500 MHz and 125 MHz, or a Bruker Avance 600 spectrometer at 600 MHz and 151 MHz if specified. The chemical shifts are given in parts per million (ppm) on the delta ( $\delta$ ) scale. The solvent peak was used as a reference value, for  $^1\text{H}$  NMR:  $\text{CDCl}_3 = 7.27$  ppm,  $\text{C}_6\text{D}_6 = 7.15$  ppm, for  $^{13}\text{C}$  NMR:  $\text{CDCl}_3 = 77.23$ . Data are reported as follows: (s = singlet; d = doublet; t = triplet; q = quartet; p = pentet; dd = doublet of doublets; ddd = doublet of doublet of doublets; dddd = doublet of doublet of doublet of doublets; dt = doublet of triplets; br = broad; app = apparent). High resolution and low resolution mass spectra were recorded on a VG 7070 spectrometer. Infrared (IR) spectra were collected on a Mattson Cygnus 100 spectrometer. Samples for IR were prepared as a thin film on a NaCl plate by dissolving the compound in  $\text{CH}_2\text{Cl}_2$  and then evaporating. Optical rotations were measured on a Perkin-Elmer 241 polarimeter. Tetrahydrofuran and diethyl ether were dried by passage through an activated alumina column under positive  $\text{N}_2$  pressure. Methylene chloride and benzene were distilled under  $\text{N}_2$  from  $\text{CaH}_2$ . Analytical TLC was performed on E. Merck pre-coated (25 mm) silica gel 60F-254 plates. Visualization was done under UV (254 nm). Flash chromatography was performed ICN SiliTech 32-63 60 Å silica gel. Reagent grade ethyl acetate, diethyl ether, pentane and hexanes (commercial mixture) were purchased from EM Science and used without further purification for chromatography. All reactions were performed in oven or flame-dried glassware under a positive pressure of  $\text{N}_2$  with magnetic stirring unless otherwise noted.

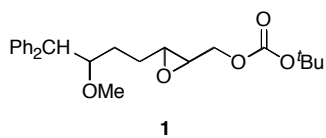

***tert*-Butyl (3-(3-methoxy-4,4-diphenylbutyl)oxiran-2-yl)methyl carbonate (1)**

$^1\text{H}$  NMR (300 MHz,  $\text{CDCl}_3$ )  $\delta$  7.38-7.16 (m, 10H), 4.23-4.18 (m, 1H), 3.99-3.92 (m, 3H), 3.14/3.13 (s, 3H), 2.94-2.91 (m, 1H), 2.81-2.77 (m, 1H), 1.79-1.42 (m, 4H), 1.48 (s, 9H);  $^{13}\text{C}$  NMR (75 MHz,  $\text{CDCl}_3$ )  $\delta$  153.4, 142.6, 142.3, 142.2, 128.9, 128.9, 128.8, 128.6, 128.5, 126.7, 126.5, 83.1, 83.0, 82.7, 67.2, 67.1, 58.3, 57.9, 56.8, 56.6, 56.5, 56.2, 55.2, 28.8, 28.0, 27.9, 27.4, 27.1; IR (neat) 2981, 2933, 1743, 1495, 1452, 1370, 1281, 1163, 1101, 912, 733, 704  $\text{cm}^{-1}$ ; HRMS (ESI):  $m/z$  calcd for  $\text{C}_{25}\text{H}_{32}\text{O}_5\text{Na}$  ( $\text{M} + \text{Na}^+$ ) 435.2147, found 435.2140.

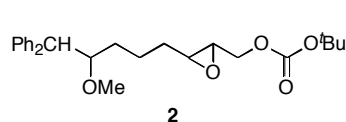

**tert-Butyl (3-(4-methoxy-5,5-diphenylpentyl)oxiran-2-yl)methyl carbonate (2)**

$^1\text{H NMR}$  (300 MHz,  $\text{CDCl}_3$ )  $\delta$  7.39-7.16 (m, 10H), 4.23-4.18 (m, 1H), 4.00 (d,  $J = 8.4$  Hz, 1H), 3.97-3.88 (m, 2H), 3.16/3.16 (s, 3H), 2.96-2.91 (m, 1H), 2.81-2.79 (m, 1H), 1.59-1.43 (m, 6H), 1.50 (s, 9H);  $^{13}\text{C NMR}$  (75 MHz,  $\text{CDCl}_3$ )  $\delta$  153.4, 142.8, 142.4, 129.0, 128.7, 128.6, 128.4, 126.6, 126.4, 83.6, 82.7, 67.2, 58.2, 58.1, 56.6, 56.5, 56.3, 55.2, 55.2, 32.0, 32.0, 31.7, 27.9, 21.6, 21.6; IR (neat) 2980, 2936, 1742, 1495, 1452, 1370, 1280, 1163, 1099, 858, 733, 704  $\text{cm}^{-1}$ ; HRMS (ESI):  $m/z$  calcd for  $\text{C}_{26}\text{H}_{34}\text{O}_5\text{Na}$  ( $\text{M} + \text{Na}^+$ ) 449.2304, found 449.2308.

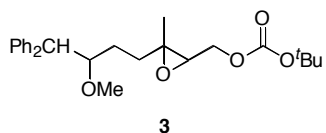

**tert-Butyl (3-(3-methoxy-4,4-diphenylbutyl)-3-methyloxiran-2-yl)methyl carbonate (3)**

$^1\text{H NMR}$  (300 MHz,  $\text{CDCl}_3$ )  $\delta$  7.39-7.17 (m, 10H), 4.20-4.14 (m, 1H), 4.09 (dd,  $J = 11.8, 6.1$  Hz, 1H), 3.99-3.91 (m, 2H), 3.15/3.14 (s, 3H), 2.97-2.91 (m, 1H), 1.83-1.42 (m, 4H), 1.50 (s, 9H), 1.20/1.18 (s, 3H);  $^{13}\text{C NMR}$  (75 MHz,  $\text{CDCl}_3$ )  $\delta$  153.5, 142.6, 142.4, 142.3, 128.9, 128.9, 128.7, 128.6, 128.4, 126.7, 126.5, 83.2, 83.0, 82.7, 65.7, 65.6, 60.8, 60.6, 59.6, 59.2, 58.1, 57.8, 56.4, 56.2, 33.5, 33.3, 27.9, 27.4, 27.1, 17.1, 16.7; IR (neat) 2980, 2933, 1743, 1495, 1453, 1370, 1327, 1279, 1163, 1098, 859, 738, 704  $\text{cm}^{-1}$ ; HRMS (ESI):  $m/z$  calcd for  $\text{C}_{26}\text{H}_{34}\text{O}_5\text{Na}$  ( $\text{M} + \text{Na}^+$ ) 449.2304, found 449.2278.

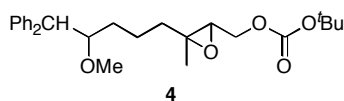

**tert-Butyl (3-(4-methoxy-5,5-diphenylpentyl)-3-methyloxiran-2-yl)methyl carbonate (4)**

$^1\text{H NMR}$  (300 MHz,  $\text{CDCl}_3$ )  $\delta$  7.39-7.17 (m, 10H), 4.18 (dd,  $J = 11.9, 4.8$  Hz, 1H), 4.09 (dd,  $J = 11.9, 6.3$  Hz, 1H), 4.00 (d,  $J = 8.4$  Hz, 1H), 3.93-3.87 (m, 1H), 3.17 (br s, 3H), 2.98-2.94 (m, 1H), 1.64-1.41 (m, 6H), 1.52 (s, 9H), 1.24 (br s, 3H);  $^{13}\text{C NMR}$  (75 MHz,  $\text{CDCl}_3$ )  $\delta$  153.4, 142.8, 142.4, 128.9, 128.6, 128.5, 128.4, 126.5, 126.4, 83.5, 82.6, 65.7, 60.6, 59.5, 59.4, 58.1, 58.0, 56.2, 38.3, 32.0, 27.9, 20.5, 20.5, 16.8, 16.8; IR (neat) 2934, 1742, 1495, 1452, 1369, 1279, 1255, 1163, 1098, 859, 704  $\text{cm}^{-1}$ ; HRMS (ESI):  $m/z$  calcd for  $\text{C}_{27}\text{H}_{36}\text{O}_5\text{Na}$  ( $\text{M} + \text{Na}^+$ ) 463.2460, found 463.2462.

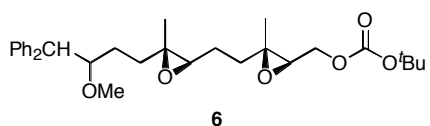

**tert-Butyl ((2R,3R)-3-(2-((2R,3R)-3-(3-methoxy-4,4-diphenylbutyl)-3-methyloxiran-2-yl)ethyl)-3-methyloxiran-2-yl)methyl carbonate (6)**

$^1\text{H NMR}$  (300 MHz,  $\text{CDCl}_3$ )  $\delta$  7.39-7.17 (m, 10H), 4.27-4.10 (m, 2H), 4.00-3.88 (m, 2H), 3.17/3.16 (s, 3H), 3.02 (t,  $J = 5.8$  Hz, 1H), 2.63-2.59 (m, 1H), 1.84-1.38 (m, 8H), 1.52 (s, 9H), 1.32 (s, 3H), 1.14/1.13 (s, 3H);  $^{13}\text{C NMR}$  (75 MHz,  $\text{CDCl}_3$ )  $\delta$  153.5, 142.7, 142.4, 142.3, 129.0, 128.9, 128.8, 128.7, 128.6, 128.4, 126.7, 126.5, 83.3, 82.8, 65.6, 61.1, 61.0, 60.3, 59.2, 58.2, 57.9, 56.4, 34.8, 33.9, 33.8, 27.9, 27.4, 24.3, 17.2, 16.9, 16.8, 16.4; IR (neat) 2978, 2932, 1743, 1495, 1453, 1370, 1279, 1256, 1163, 1098, 858, 756, 704  $\text{cm}^{-1}$ ; HRMS (ESI):  $m/z$  calcd for  $\text{C}_{31}\text{H}_{42}\text{O}_6\text{Na}$  ( $\text{M} + \text{Na}^+$ ) 533.2879, found 533.2859;  $[\alpha]_D = +17.3$  ( $\text{CHCl}_3$ ,  $c$  1.49).

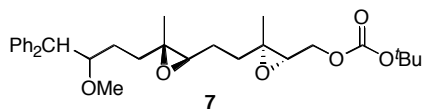

**tert-Butyl ((2S,3S)-3-(2-((2R,3R)-3-(3-methoxy-4,4-diphenylbutyl)-3-methyloxiran-2-yl)ethyl)-3-methyloxiran-2-yl)methyl carbonate (7)**

$^1\text{H NMR}$  (300 MHz,  $\text{CDCl}_3$ )  $\delta$  7.41-7.18 (m, 10H), 4.29-4.21 (m, 1H), 4.19-4.11 (m, 1H), 4.02-3.92 (m, 2H), 3.18/3.17 (s, 3H), 3.04 (dd,  $J = 6.2, 4.8$  Hz, 1H), 2.63-2.59 (m, 1H), 1.82-1.40 (m, 8H), 1.53 (s, 9H), 1.32 (s, 3H), 1.17/1.15 (s, 3H);  $^{13}\text{C NMR}$  (75 MHz,  $\text{CDCl}_3$ )  $\delta$  153.5, 142.7, 142.4, 142.2, 129.0, 128.7, 128.6, 128.4, 126.6, 126.4, 83.3, 82.7, 65.6, 63.1, 62.7, 60.9, 60.3, 59.8, 58.1, 57.8, 56.3, 56.1, 35.2, 33.9, 33.8, 27.9, 27.6, 27.3, 24.5, 16.9, 16.8, 16.4; IR (neat) 2977, 2932, 1742, 1495, 1453, 1370, 1279, 1256, 1163, 1097, 858, 704  $\text{cm}^{-1}$ ; HRMS (ESI):  $m/z$  calcd for  $\text{C}_{31}\text{H}_{42}\text{O}_6\text{Na}$  ( $\text{M} + \text{Na}$ ) 533.2879, found 533.2857;  $[\alpha]_{\text{D}} = +1.3$  ( $\text{CHCl}_3$ ,  $c$  2.2).

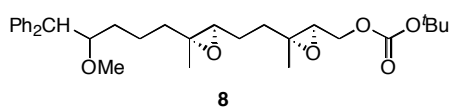

**tert-Butyl ((2R,3R)-3-(2-((2R,3R)-3-(4-methoxy-5,5-diphenylpentyl)-3-methyloxiran-2-yl)ethyl)-3-methyloxiran-2-yl)methyl carbonate (8)**

$^1\text{H NMR}$  (300 MHz,  $\text{CDCl}_3$ )  $\delta$  7.41-7.18 (m, 10H), 4.30-4.14 (m, 2H), 4.02 (d,  $J = 8.4$  Hz, 1H), 3.98-3.85 (m, 1H), 3.19/3.18 (s, 3H), 3.05 (t,  $J = 5.7$  Hz, 1H), 2.66-2.63 (m, 1H), 1.81-1.39 (m, 8H), 1.52 (s, 9H), 1.35 (s, 3H), 1.20/1.19 (s, 3H);  $^{13}\text{C NMR}$  (75 MHz,  $\text{CDCl}_3$ )  $\delta$  153.5, 142.9, 142.5, 142.4, 129.0, 128.9, 128.7, 128.6, 128.4, 126.6, 126.4, 83.7, 83.6, 82.7, 65.6, 62.9, 62.8, 61.0, 60.3, 59.3, 58.1, 58.0, 56.3, 38.8, 38.8, 34.8, 32.2, 27.9, 24.4, 20.9, 20.8, 17.1, 16.5, 16.5; IR (neat) 3026, 2934, 1743, 1495, 1453, 1370, 1279, 1256, 1163, 1098, 859, 747, 705  $\text{cm}^{-1}$ ; HRMS (ESI):  $m/z$  calcd for  $\text{C}_{32}\text{H}_{44}\text{O}_6\text{Na}$  ( $\text{M} + \text{Na}^+$ ) 547.3036, found 547.3002;  $[\alpha]_{\text{D}} = +11.0$  ( $\text{CHCl}_3$ ,  $c$  2.01).

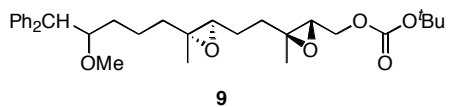

**tert-Butyl ((2S,3S)-3-(2-((2R,3R)-3-(4-methoxy-5,5-diphenylpentyl)-3-methyloxiran-2-yl)ethyl)-3-methyloxiran-2-yl)methyl carbonate (9)**

$^1\text{H NMR}$  (300 MHz,  $\text{CDCl}_3$ )  $\delta$  7.43-7.07 (m, 10H), 4.29 (dd,  $J = 11.9, 4.8$  Hz, 1H), 4.17 (dd,  $J = 11.9, 6.3$  Hz, 1H), 4.04 (d,  $J = 8.4$  Hz, 1H), 3.99-3.90 (m, 1H), 3.20/3.19 (s, 3H), 3.07 (t,  $J = 5.3$  Hz, 1H), 2.67-2.62 (m, 1H), 1.77-1.42 (m, 10H), 1.54 (s, 9H), 1.35 (s, 3H), 1.22 (br s, 3H);  $^{13}\text{C NMR}$  (75 MHz,  $\text{CDCl}_3$ )  $\delta$  153.4, 142.8, 142.4, 142.4, 128.9, 128.8, 128.6, 128.5, 128.3, 126.5, 126.4, 83.5, 83.5, 82.6, 65.6, 63.0, 62.9, 60.8, 60.8, 60.3, 59.7, 58.0, 57.9, 56.2, 38.7, 38.7, 35.1, 32.1, 27.8, 24.4, 20.8, 20.6, 16.8, 16.5, 16.4; IR (neat) 2979, 2935, 1743, 1495, 1453, 1370, 1279, 1163, 1098, 912, 859, 733, 704  $\text{cm}^{-1}$ ; HRMS (ESI):  $m/z$  calcd for  $\text{C}_{32}\text{H}_{44}\text{O}_6\text{Na}$  ( $\text{M} + \text{Na}^+$ ) 547.3036, found 547.3031;  $[\alpha]_{\text{D}} = +0.5$  ( $\text{CHCl}_3$ ,  $c$  1.21).

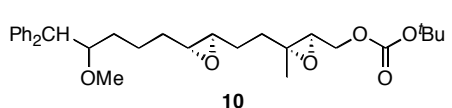

**tert-Butyl ((2R,3R)-3-(2-((2R,3R)-3-(4-methoxy-5,5-diphenylpentyl)oxiran-2-yl)ethyl)-3-methyloxiran-2-yl)methyl carbonate (10)**

$^1\text{H NMR}$  (300 MHz,  $\text{CDCl}_3$ )  $\delta$  7.39-7.17 (m, 10H), 4.22 (dd,  $J = 11.8, 4.7$  Hz, 1H), 4.14 (dd,  $J = 11.9, 6.0$  Hz, 1H), 4.00 (d,  $J = 8.3$  Hz, 1H), 3.93-3.88 (m, 1H), 3.17/3.16 (s, 3H), 3.02 (t,  $J = 5.4$  Hz, 1H), 2.64-2.60 (m, 2H), 1.75-1.44 (m, 10H), 1.50 (s, 9H), 1.32 (s, 3H);  $^{13}\text{C NMR}$  (75 MHz,  $\text{CDCl}_3$ )  $\delta$  153.5, 142.9, 142.4, 129.0, 128.7, 128.6, 128.4, 126.6, 126.4, 83.7, 82.8, 65.6, 60.2, 59.3, 58.8, 58.8, 58.2, 58.1, 56.3, 34.2, 32.2, 27.9, 27.6, 21.7,

17.1; IR (neat) 2978, 2934, 1743, 1495, 1453, 1370, 1279, 1256, 1163, 1097, 859, 746, 704  $\text{cm}^{-1}$ ;  $[\alpha]_{\text{D}} = +19.1$  ( $\text{CHCl}_3$ ,  $c$  1.08).

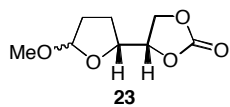

**(S)-4-((R)-Tetrahydro-5-methoxyfuran-2-yl)-1,3-dioxolan-2-one (23)**

To **1** (92.0 mg, 0.223 mmol) in dichloroethane/toluene (8.6 mL, 5:1, v/v) in a borosilicate flask at room temperature were added activated 4Å molecular sieves (184 mg), anhydrous  $\text{Na}_2\text{S}_2\text{O}_3$  (184 mg), NaOAc (184 mg) and *N*-methylquinolinium hexafluorophosphate (6.4 mg, 22  $\mu\text{mol}$ ). The mixture was photoirradiated with gentle aeration for 3 h while stirring at room temperature. The reaction mixture was filtered through a small plug of silica gel and the residue was washed with  $\text{Et}_2\text{O}$  (40 mL). The filtrate was concentrated and the resulting residue was purified by flash chromatography (45% - 55% EtOAc in hexanes) to give the product **23** (24.8 mg, 59.0%) in a 1.9:1 diastereomeric ratio as a colorless oil:  $^1\text{H}$  NMR (300 MHz,  $\text{CDCl}_3$ )  $\delta$  5.04 (dd,  $J = 4.5, 1.8$  Hz, 66% of 1H), 5.01-4.99 (m, 34% of 1H), 4.67-4.46 (m, 2.4H), 4.39-4.20 (m, 1.6H), 3.33/3.32 (s, 3H), 2.26-1.93 (m, 3H), 1.74-1.66 (m, 1H);  $^{13}\text{C}$  NMR (75 MHz,  $\text{CDCl}_3$ )  $\delta$  155.1 (minor), 154.9 (major), 105.7 (minor), 105.6 (major), 79.4 (minor), 77.8 (minor), 77.1 (major), 66.8 (major), 66.4 (minor), 55.1 (major), 32.7 (minor), 31.7 (major), 25.9 (minor), 25.5 (major); IR (neat) 2920, 1807, 1464, 1376, 1170, 1088, 1031, 955  $\text{cm}^{-1}$ ; HRMS (EI):  $m/z$  calcd for  $\text{C}_7\text{H}_9\text{O}_4$  ( $\text{M}^+ - \text{CH}_3\text{O}$ ) 157.0501, found 157.0499.

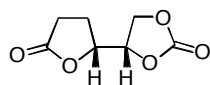

**(S)-4-((R)-Tetrahydro-5-oxofuran-2-yl)-1,3-dioxolan-2-one**

$^1\text{H}$  NMR (300 MHz,  $\text{CDCl}_3$ )  $\delta$  4.74 (ddd,  $J = 8.0, 6.7, 5.8$  Hz, 1H), 4.64 (t,  $J = 8.9$  Hz, 1H), 4.65-4.58 (m, 1H), 4.40 (dd,  $J = 8.9, 5.6$  Hz, 1H), 2.68-2.62 (m, 2H), 2.60-2.50 (m, 1H), 2.20-2.10 (m, 1H);  $^{13}\text{C}$  NMR (75 MHz,  $\text{CDCl}_3$ )  $\delta$  175.2, 154.0, 78.1, 76.2, 66.7, 27.5, 24.0; IR (neat) 2919, 1778, 1462, 1401, 1328, 1173, 1087, 1048  $\text{cm}^{-1}$ ; HRMS (EI):  $m/z$  calcd for  $\text{C}_7\text{H}_8\text{O}_5$  ( $\text{M} + \text{H}$ ) 173.0450, found 173.0455.

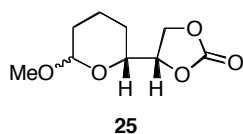

**25**

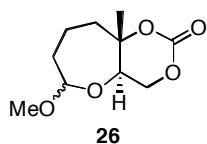

**26**

**(S)-4-((R)-Tetrahydro-6-methoxy-2H-pyran-2-yl)-1,3-dioxolan-2-one (25) and (4aR,9aS)-Hexahydro-6-methoxy-4H-[1,3]dioxino[5,4-b]oxepin-2-one (26)**

To diepoxide **4** (102.0 mg, 0.239 mmol) in dichloroethane/toluene (9.2 mL, 5:1, v/v) in a borosilicate flask at room temperature were added activated 4Å molecular sieves (204 mg), anhydrous  $\text{Na}_2\text{S}_2\text{O}_3$  (204 mg), NaOAc (204 mg) and *N*-methylquinolinium hexafluorophosphate (6.9 mg, 24  $\mu\text{mol}$ ). The mixture was photoirradiated with gentle aeration for 3 h while stirring at room temperature. The reaction mixture was filtered through a small plug of silica gel and the residue was washed with  $\text{Et}_2\text{O}$  (50 mL). The filtrate was concentrated and the resulting yellowish-green residue was dissolved in  $\text{CH}_2\text{Cl}_2$  (2.0 mL). To this solution were added  $\text{Et}_3\text{N}$  (0.22 mL, 1.6 mmol),  $\text{Ac}_2\text{O}$  (57  $\mu\text{L}$ , 0.6 mmol) and DMAP (2.4 mg, 20  $\mu\text{mol}$ ) sequentially. The mixture was stirred at room temperature for 3 h, then concentrated and purified by column chromatography (20% - 50% EtOAc in hexanes) to provide the cyclization products, which were further purified by column chromatography (4% - 10% EtOAc in  $\text{CH}_2\text{Cl}_2$ ) to give **25** (14.6 mg, 30.2%, dr = 2:1) and **26** (10.6 mg, 21.9%, dr = 3.4:1) as colorless oils. **25**:  $^1\text{H}$  NMR (300 MHz,  $\text{CDCl}_3$ )  $\delta$  4.74 (app d,  $J = 2.5$  Hz, 66% of 1H), 4.62-4.45 (m, 3H), 4.37 (dd,  $J = 9.3, 2.2$  Hz, 34% of 1H), 3.96 (ddd,  $J = 11.8, 4.4, 1.9$  Hz, 66% of 1H), 3.66 (ddd,  $J = 11.2, 5.6, 2.2$  Hz, 34% of 1H), 3.46 (s, 34% of 3H), 3.36 (s, 66% of 3H), 1.98-1.16 (m, 6H);  $^{13}\text{C}$  NMR (75 MHz,  $\text{CDCl}_3$ )  $\delta$  155.1



(major), 155.0 (minor), 103.4 (minor), 98.4 (major), 78.0 (major), 77.4 (minor), 75.3 (minor), 68.2 (major), 66.4 (minor), 66.1 (major), 56.4 (minor), 55.0 (major), 30.9 (minor), 29.5 (major), 26.6 (minor), 26.5 (major), 21.2 (minor), 17.2 (major); IR (neat) 2952, 2851, 1799, 1389, 1174, 1078, 1031  $\text{cm}^{-1}$ ; HRMS (EI):  $m/z$  calcd for  $\text{C}_8\text{H}_{11}\text{O}_4$  ( $\text{M}^+$ ) 171.0657, found 171.0650. **26**:  $^1\text{H}$  NMR (300 MHz,  $\text{CDCl}_3$ )  $\delta$  4.74 (t,  $J = 4.2$  Hz, 23% of 1H), 4.66 (dd,  $J = 8.6, 5.7$  Hz, 77% of 1H), 4.42 (dd,  $J = 10.6, 5.8$  Hz, 23% of 1H), 4.36-4.29 (m, 77% of 1H), 4.22-4.06 (m, 2.8H), 3.79 (dt,  $J = 9.7, 9.7, 5.8$  Hz, 23% of 1H), 3.42 (s, 23% of 3H), 3.36 (s, 77% of 3H), 2.37-2.14 (m, 3H), 1.96-1.93 (m, 23% of 1H), 1.77-1.42 (m, 5H);  $^{13}\text{C}$  NMR (75 MHz,  $\text{CDCl}_3$ )  $\delta$  148.5 (minor), 148.1 (major), 104.9 (minor), 102.8 (major), 81.2 (minor), 80.8 (major), 69.3 (major), 69.2 (minor), 68.2 (minor), 61.5 (major), 56.4 (minor), 55.8 (major), 35.5 (major), 34.2 (major), 33.5 (minor), 27.9 (minor), 17.7 (major), 16.6 (minor); IR (neat) 2943, 1760, 1403, 1382, 1224, 1140, 1057  $\text{cm}^{-1}$ ; HRMS (EI):  $m/z$  calcd for  $\text{C}_8\text{H}_{11}\text{O}_4$  ( $\text{M}^+$ ) 171.0657, found 171.0651; an analytical sample of the major diastereomer was obtained through purifying the above mixture by column chromatography (35% - 45% EtOAc in hexanes):  $^1\text{H}$  NMR (300 MHz,  $\text{C}_6\text{D}_6$ )  $\delta$  4.02 (dd,  $J = 8.9, 5.8$  Hz, 1H), 3.60 (dd,  $J = 10.1, 5.5$  Hz, 1H), 3.42 (t,  $J = 10.2$  Hz, 1H), 3.34-3.27 (m, 2H), 2.85 (s, 3H), 1.76-1.67 (m, 1H), 1.57-1.47 (m, 1H), 1.10 (dddd,  $J = 15.3, 11.6, 8.9, 1.0$  Hz, 1H), 0.95-0.85 (m, 2H), 0.82-0.71 (m, 1H).

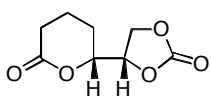

**(R)-Tetrahydro-6-((S)-2-oxo-1,3-dioxolan-4-yl)pyran-2-one**

To a solution of acetal **25** (6.0 mg, 30  $\mu\text{mol}$ ) in  $\text{CH}_2\text{Cl}_2$  (0.6 mL) at 0  $^\circ\text{C}$  were added *m*-chloroperbenzoic acid (pure, 6.7 mg, 39  $\mu\text{mol}$ ) and  $\text{BF}_3 \cdot \text{OEt}_2$  (4.5  $\mu\text{L}$ , 36  $\mu\text{mol}$ ) sequentially. After stirring at 0  $^\circ\text{C}$  for 10 min and then at room temperature for 1.5 h, the mixture was cooled to 0  $^\circ\text{C}$  and  $\text{Et}_3\text{N}$  (20.7  $\mu\text{L}$ , 148  $\mu\text{mol}$ ) was added dropwise. The mixture was stirred at 0  $^\circ\text{C}$  for 1 h, then concentrated, and the resulting residue was purified by column chromatography (15% - 25% EtOAc in  $\text{CH}_2\text{Cl}_2$ ) to give the desired lactone (4.6 mg, 83.6%) as a colorless liquid:  $^1\text{H}$  NMR (300 MHz,  $\text{CDCl}_3$ )  $\delta$  4.69-4.59 (m, 2H), 4.56-4.41 (m, 2H), 2.69 (dddd,  $J = 18.0, 6.8, 4.8, 1.1$  Hz, 1H), 2.54 (ddd,  $J = 17.9, 9.3, 7.0$  Hz, 1H), 2.24-2.16 (m, 1H), 2.08-1.90 (m, 2H), 1.64 (dtd,  $J = 13.8, 11.0, 5.2$  Hz, 1H);  $^{13}\text{C}$  NMR (75 MHz,  $\text{CDCl}_3$ )  $\delta$  169.3, 154.2, 79.0, 76.3, 66.9, 29.8, 24.6, 18.2; IR (neat) 2919, 1790, 1732, 1376, 1239, 1166, 1056  $\text{cm}^{-1}$ ; HRMS (EI):  $m/z$  calcd for  $\text{C}_8\text{H}_{10}\text{O}_5$  ( $\text{M}^+$ ) 186.0528, found 186.0536.

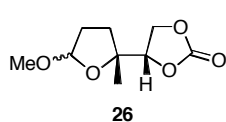

**26**

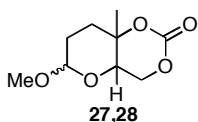

**27,28**

**4-(Tetrahydro-5-methoxy-2-methylfuran-2-yl)-1,3-dioxolan-2-one (26) and Hexahydro-6-methoxy-8a-methylpyrano[3,2-d][1,3]dioxin-2-one (27 and 28)**

To **3** (100 mg, 0.294 mmol) in dichloroethane/toluene (9.0 mL, 5:1, v/v) in a borosilicate flask at room temperature were added activated 4 $\text{\AA}$  molecular sieves (200 mg), anhydrous  $\text{Na}_2\text{S}_2\text{O}_3$  (200 mg), NaOAc (200 mg) and *N*-methylquinolinium hexafluorophosphate (6.8 mg, 23  $\mu\text{mol}$ ). The mixture was photoirradiated with gentle aeration for 2.5 h while stirring at room temperature. The reaction mixture was filtered through a small plug of silica gel and the residue was washed with EtOAc (30 mL). The filtrate was concentrated and the resulting residue was purified by flash chromatography (30% - 45% EtOAc in hexanes) to provide a mixture of **26** and **27** (19 mg, 40%, pale yellow oil) with a molar ratio of 4.8:1 and **28** (3.8 mg, 8.0%) as a white solid. For the mixture of **26** and **27**: IR (neat) 2929, 2835, 1791, 1755, 1463, 1375, 1170, 1084, 1034, 951  $\text{cm}^{-1}$ . **8**:  $^1\text{H}$  NMR (300 MHz,  $\text{CDCl}_3$ )  $\delta$  4.78 (app d,  $J = 2.0$  Hz, 1H), 4.66 (dd,  $J = 12.1, 2.7$  Hz, 1H), 4.34 (dd,  $J = 12.1, 0.4$  Hz, 1H), 3.86 (app d,  $J = 2.0$  Hz, 1H), 3.41 (s, 3H), 2.12-2.00 (m, 1H), 1.94 (dd,  $J = 12.8, 4.0$  Hz, 1H), 1.87-1.81 (m, 1H),

1.67-1.61 (m, 1H), 1.45 (s, 3H);  $^{13}\text{C}$  NMR (75 MHz,  $\text{CDCl}_3$ )  $\delta$  148.5, 98.3, 78.6, 69.3, 63.2, 55.4, 29.4, 25.3, 25.1; IR (neat) 2932, 1748, 1212, 1178, 1130, 1060, 1024  $\text{cm}^{-1}$ ; HRMS (EI):  $m/z$  calcd for  $\text{C}_9\text{H}_{15}\text{O}_5$  ( $\text{M} + \text{H}^+$ ) 203.0919, found 203.0929.

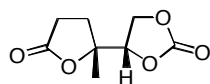

**(S)-4-((R)-Tetrahydro-2-methyl-5-oxofuran-2-yl)-1,3-dioxolan-2-one**

To a solution of the acetal mixture **26** and **27** (18.9 mg, 93.5  $\mu\text{mol}$ ) in acetone (3.0 mL) at 0  $^\circ\text{C}$  was added Jones reagent (0.3 mL). The mixture was stirred at 0  $^\circ\text{C}$  for 15 min and then at room temperature for 3 h. After that time, the reaction was quenched with isopropyl alcohol (1 drop), concentrated and purified by column chromatography (2% - 20% EtOAc in  $\text{CH}_2\text{Cl}_2$ ) to give the unreacted acetal **7** (2.9 mg, 15.3%) as colorless needles and the title lactone (11.0 mg, ~74.8% based on unreacted acetal):  $^1\text{H}$  NMR (300 MHz,  $\text{CDCl}_3$ )  $\delta$  4.72 (dd,  $J = 8.4, 6.2$  Hz, 1H), 4.57 (t,  $J = 9.0$  Hz, 1H), 4.36 (dd,  $J = 9.2, 6.1$  Hz, 1H), 2.70 (t,  $J = 8.8$  Hz, 2H), 2.34-2.24 (m, 1H), 2.19-2.09 (m, 1H), 1.47 (s, 3H);  $^{13}\text{C}$  NMR (75 MHz,  $\text{CDCl}_3$ )  $\delta$  175.0, 154.1, 83.9, 78.7, 65.4, 30.0, 28.2, 20.8; IR (neat) 2920, 1789, 1463, 1267, 1167, 1082  $\text{cm}^{-1}$ ; HRMS (EI):  $m/z$  calcd for  $\text{C}_8\text{H}_{11}\text{O}_5$  ( $\text{M} + \text{H}^+$ ) 187.0606, found 187.0612.

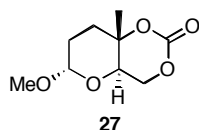

**(4aR,6S,8aS)-Hexahydro-6-methoxy-8a-methylpyrano[3,2-d][1,3]dioxin-2-one (27)**

$^1\text{H}$  NMR (300 MHz,  $\text{CDCl}_3$ )  $\delta$  4.73 (app d,  $J = 2.4$  Hz, 1H), 4.37 (dd,  $J = 8.4, 4.4$  Hz, 1H), 4.18 (d,  $J = 8.2$  Hz, 1H), 4.16 (d,  $J = 4.7$  Hz, 1H), 3.38 (s, 3H), 2.13-2.04 (m, 1H), 1.95-1.76 (m, 3H), 1.50 (s, 3H);  $^{13}\text{C}$  NMR (75 MHz,  $\text{CDCl}_3$ )  $\delta$  148.1, 98.3, 77.5, 67.0, 62.7, 55.3, 31.1, 27.8, 17.5; IR (neat) 2917, 1757, 1464, 1196, 1111, 1068  $\text{cm}^{-1}$ ; HRMS (EI):  $m/z$  calcd for  $\text{C}_9\text{H}_{15}\text{O}_5$  ( $\text{M} + \text{H}^+$ ) 203.0919, found 203.0930.

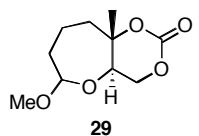

**(4aR,9aS)-Hexahydro-6-methoxy-9a-methyl-4H-[1,3]dioxino[5,4-b]oxepin-2-one (29)**

To *tert*-butyl carbonate **4** (65.8 mg, 149  $\mu\text{mol}$ ) in dichloroethane/toluene (5.7 mL, 5:1, v/v) in a borosilicate flask at room temperature were added activated 4 $\text{\AA}$  molecular sieves (132 mg), anhydrous  $\text{Na}_2\text{S}_2\text{O}_3$  (132 mg, 0.832 mmol), NaOAc (132 mg, 1.60 mmol) and *N*-methylquinolinium hexafluorophosphate (4.3 mg, 15  $\mu\text{mol}$ ). The mixture was photoirradiated with gentle aeration for 2 h while stirring at room temperature. The reaction mixture was filtered through a small plug of silica gel and the residue was washed with EtOAc (20 mL). The filtrate was concentrated and the resulting residue was purified by flash chromatography (5% - 15% EtOAc in  $\text{CH}_2\text{Cl}_2$ ) to provide the desired compound **29** (23.7 mg, 73.4%) as a mixture of two diastereomers in a 1.2:1 ratio:  $^1\text{H}$  NMR (300 MHz,  $\text{CDCl}_3$ )  $\delta$  4.76 (t,  $J = 3.8$  Hz, 46% of 1H), 4.66 (dd,  $J = 8.8, 5.8$  Hz, 54% of 1H), 4.34 (dd,  $J = 10.8, 6.4$  Hz, 46% of 1H), 4.29-4.18 (m, 54% of 2H), 4.19 (t,  $J = 10.8$  Hz, 46% of 1H), 3.88 (dd,  $J = 10.6, 6.4$  Hz, 46% of 1H), 3.42 (s, 46% of 3H), 3.35 (s, 54% of 3H), 2.23-2.01 (m, ~1.5H), 1.96-1.92 (m, 46% of 1H), 1.75-1.58 (m, ~3.5H), 1.51 (s, 46% of 3H), 1.48 (s, 54% of 3H), 1.45-1.35 (m, 1H);  $^{13}\text{C}$  NMR (75 MHz,  $\text{CDCl}_3$ )  $\delta$  148.2, 148.0, 104.3, 102.8, 84.2, 83.0, 68.1, 66.7, 66.3, 62.7, 56.3, 55.7, 43.2, 41.7, 34.5, 34.4, 19.6, 19.3, 18.3, 16.7; IR (neat) 2941, 1755, 1464, 1384, 1252, 1199, 1128, 1091, 1050, 969; HRMS (EI):  $m/z$  calcd for  $\text{C}_9\text{H}_{13}\text{O}_4\text{Na}$  ( $\text{M}^+ - \text{CH}_3\text{O}$ ) 185.0814, found 185.0811; an analytical sample of the slightly major diastereomer was obtained through purifying the above mixture by column chromatography (35% - 40% EtOAc in hexanes):  $^1\text{H}$  NMR (300 MHz,  $\text{C}_6\text{D}_6$ )  $\delta$  4.00 (dd,  $J = 8.8, 5.9$  Hz, 1H), 3.60 (d,  $J = 10.4$  Hz, 1H), 3.58 (d,  $J =$

6.8 Hz, 1H), 3.44 (dd,  $J = 10.4, 6.8$  Hz, 1H), 2.85 (s, 3H), 1.56-1.48 (m, 2H), 1.19-1.10 (m, 2H), 0.98-0.88 (m, 1H), 0.94 (s, 3H), 0.75-0.66 (m, 1H).

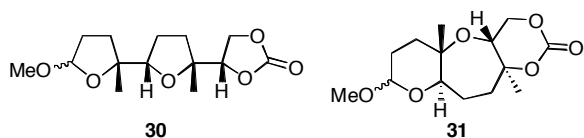

**(S)-4-((2R,5S)-Tetrahydro-5-((R)-tetrahydro-5-methoxy-2-methylfuran-2-yl)-2-methylfuran-2-yl)-1,3-dioxolan-2-one (30)** and **(4aR,5aS,9aR,11aS)-8-Methoxy-5a,11a-dimethyldecahydro-1,3,5,9-tetraoxadibenzo[a,d]cyclohepten-2-one (31)**

To diepoxide **6** (129 mg, 0.253 mmol) in dichloroethane/toluene (9.7 mL, 5:1, v/v) in a borosilicate flask at room temperature were added activated 4Å molecular sieves (258 mg), anhydrous  $\text{Na}_2\text{S}_2\text{O}_3$  (258 mg, 1.63 mmol), NaOAc (258 mg, 3.15 mmol) and *N*-methylquinolinium hexafluorophosphate (7.3 mg, 25  $\mu\text{mol}$ ). The mixture was photoirradiated with gentle aeration for 4.5 h while stirring at room temperature. The reaction mixture was filtered through a small plug of silica gel and the residue was washed with EtOAc (40 mL). The filtrate was concentrated and the resulting residue was purified by flash chromatography (35% - 50% EtOAc in hexanes) to provide a mixture of **12** and **13** (28.7 mg, 39.6%) as a colorless oil: IR (neat) 2926, 1796, 1754, 1460, 1374, 1166, 1085, 1036, 1006, 952  $\text{cm}^{-1}$ .

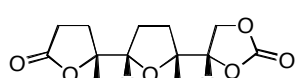

**(S)-4-((2R,5S)-Tetrahydro-5-((R)-tetrahydro-2-methyl-5-oxofuran-2-yl)-2-methylfuran-2-yl)-1,3-dioxolan-2-one**

A mixture of acetals **30** and **31** (21 mg, 73  $\mu\text{mol}$ ) in acetone (2.1 mL) at 0 °C was treated dropwise with Jones reagent (0.2 mL). The mixture was stirred at 0 °C for 10 min, then at room temperature for 1.5 h and purified without workup by column chromatography (50% - 90% EtOAc in hexanes) to give the unreacted acetal **31** (3.2 mg, 15.4%, nearly pure) and the title lactone (13.8 mg, ~80%).  $^1\text{H}$  NMR (300 MHz,  $\text{CDCl}_3$ )  $\delta$  4.60 (dd,  $J = 8.4, 6.2$  Hz, 1H), 4.50 (t,  $J = 8.6$  Hz, 1H), 4.38 (dd,  $J = 8.7, 6.2$  Hz, 1H), 4.08 (dd,  $J = 8.6, 6.3$  Hz, 1H), 2.64-2.58 (m, 2H), 2.31-2.19 (m, 1H), 2.10-2.04 (m, 2H), 1.94-1.73 (m, 3H), 1.39 (s, 3H), 1.27 (s, 3H);  $^{13}\text{C}$  NMR (75 MHz,  $\text{CDCl}_3$ )  $\delta$  176.7, 155.1, 86.9, 83.5, 83.2, 79.5, 66.0, 34.1, 29.3, 29.2, 26.7, 23.8, 21.0; IR (neat) 2958, 2924, 2853, 1790, 1770, 1456, 1382, 1248, 1166, 1085, 1020, 944, 770, 728  $\text{cm}^{-1}$ ; HRMS (EI):  $m/z$  calcd for  $\text{C}_{13}\text{H}_{18}\text{O}_6$  (M) 270.1103, found 270.1094;  $[\alpha]_{\text{D}} = +4.5$  ( $\text{CHCl}_3$ ,  $c$  0.24).

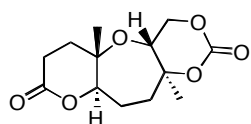

**4aR,5aS,9aR,11aS)-5a,11a-Dimethyloctahydro-1,3,5,9-tetraoxadibenzo[a,d]cycloheptene-2,8-dione**

A solution of acetal **31** (2.9 mg, 11  $\mu\text{mol}$ ) in  $\text{CH}_2\text{Cl}_2$  (0.5 mL) at 0 °C was treated with *m*-chloroperbenzoic acid (2.5 mg, 15  $\mu\text{mol}$ ) and  $\text{BF}_3 \cdot \text{OEt}_2$  (1.9  $\mu\text{L}$ , 13  $\mu\text{mol}$ ) sequentially. After stirred at 0 °C for 10 min and then at room temperature for 30 min, the mixture was cooled to 0 °C and  $\text{Et}_3\text{N}$  (7.8  $\mu\text{L}$ , 56  $\mu\text{mol}$ ) was added dropwise. The mixture was stirred at 0 °C for 30 min, and purified by column chromatography (10% - 20% EtOAc in  $\text{CH}_2\text{Cl}_2$ ) to give the desired lactone (1.8 mg, 67%) as colorless needles:  $^1\text{H}$  NMR (300 MHz,  $\text{CDCl}_3$ )  $\delta$  4.28 (dd,  $J = 8.6, 5.1$  Hz, 1H), 4.21-4.14 (m, 1H), 4.09 (dd,  $J = 10.1, 8.6$  Hz, 1H), 4.06 (dd,  $J = 11.0, 2.9$  Hz, 1H), 2.80 (ddd,  $J = 18.3, 9.4, 5.5$  Hz, 1H), 2.64 (ddd,  $J = 18.3, 8.7, 7.4$  Hz, 1H), 2.35-2.28 (m, 1H), 2.17-1.88 (m, 5H), 1.50 (s, 3H), 1.38 (s, 3H);  $^{13}\text{C}$  NMR (75 MHz,  $\text{CDCl}_3$ )  $\delta$  170.4, 148.2, 83.1, 82.7, 77.4, 75.7, 66.5, 65.2, 37.2, 34.3, 27.5, 24.8, 22.4, 16.0; IR (neat) 2923, 1747, 1463, 1408, 1229, 1124, 1068  $\text{cm}^{-1}$ ;  $^1\text{H}$  NMR (300 MHz,  $\text{C}_6\text{D}_6$ )  $\delta$  3.44 (d,  $J = 7.7$  Hz, 1H), 3.43 (d,  $J = 9.6$  Hz, 1H), 3.18 (dd,  $J = 9.6, 7.7$  Hz, 1H), 2.93 (dd,  $J = 10.9, 3.0$  Hz,

1H), 2.02-1.97 (m, 2H), 1.65 (td,  $J = 15.3, 4.8$  Hz, 1H), 1.43-1.26 (m, 3H), 1.17-1.04 (m, 2H), 0.81 (s, 3H), 0.48 (s, 3H); HRMS (ESI):  $m/z$  calcd for  $C_{13}H_{18}O_6Na$  ( $M + Na^+$ ) 293.1001, found 293.1020;  $[\alpha]_D = +101$  ( $CHCl_3, c 0.15$ ).

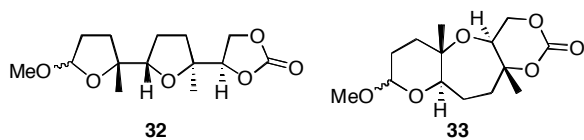

**(R)-4-((2S,5S)-tetrahydro-5-((R)-tetrahydro-5-methoxy-2-methylfuran-2-yl)-2-methylfuran-2-yl)-1,3-dioxolan-2-one (32)** and **(4aS,5aS,9aR,11aR)-8-methoxy-5a,11a-dimethyldecahydro-1,3,5,9-tetraoxadibenzo[a,d]cyclohepten-2-one (33)**

To diepoxide **7** (150 mg, 0.294 mmol) in dichloroethane/toluene (11.3 mL, 5:1, v/v) in a borosilicate flask at room temperature were added activated 4Å molecular sieves (300 mg), anhydrous  $Na_2S_2O_3$  (300 mg, 1.90 mmol), NaOAc (300 mg, 3.66 mmol) and *N*-methylquinolinium hexafluorophosphate (8.5 mg, 29 μmol). The mixture was photoirradiated with gentle aeration for 4.5 h while stirring at room temperature. The reaction mixture was filtered through a small plug of silica gel and the residue was washed with EtOAc (40 mL). The filtrate was concentrated and the resulting residue was purified by flash chromatography (35% - 50% EtOAc in hexanes) to provide a mixture of **32** and **33** (51.2 mg, 60.9%): IR (neat) 2925, 1797, 1750, 1462, 1384, 1259, 1167, 1120  $cm^{-1}$ .

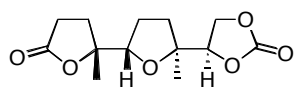

**(R)-4-((2S,5S)-tetrahydro-5-((R)-tetrahydro-2-methyl-5-oxofuran-2-yl)-2-methylfuran-2-yl)-1,3-dioxolan-2-one**

A mixture of acetals **32** and **33** (34.9 mg, 122 μmol) in acetone (1.8 mL) at 0 °C was treated dropwise with Jones reagent (0.3 mL). The mixture was stirred at 0 °C for 10 min, then at room temperature for 1.5 h and purified without workup by column chromatography (50% - 90% EtOAc in hexanes) to give the unreacted acetal **16** (4.9 mg, nearly pure) and the title lactone (22.1 mg, ~81%). For the title lactone:  $^1H$  NMR (300 MHz,  $CDCl_3$ )  $\delta$  4.58 (dd,  $J = 8.3, 6.1$  Hz, 1H), 4.48 (t,  $J = 8.4$  Hz, 1H), 4.32 (dd,  $J = 8.8, 6.1$  Hz, 1H), 4.08 (dd,  $J = 8.8, 5.6$  Hz, 1H), 2.65-2.59 (m, 2H), 2.24 (ddd,  $J = 12.9, 9.6, 6.9$  Hz, 1H), 2.07-1.81 (m, 5H), 1.38 (s, 3H), 1.27 (s, 3H);  $^{13}C$  NMR (75 MHz,  $CDCl_3$ )  $\delta$  176.7, 155.0, 86.9, 85.1, 83.1, 80.3, 66.2, 34.5, 29.4, 29.1, 27.0, 23.4, 21.3; IR (neat) 2979, 2880, 1790, 1767, 1454, 1382, 1170, 1111, 1085, 944  $cm^{-1}$ ; HRMS (EI):  $m/z$  calcd for  $C_{13}H_{18}O_6$  ( $M$ ) 270.1103, found 270.1095;  $[\alpha]_D = -11.3$  ( $CHCl_3, c 1.03$ ).

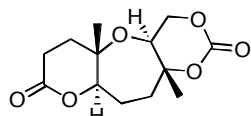

**(4aS,5aS,9aR,11aR)-5a,11a-dimethyloctahydro-1,3,5,9-tetraoxadibenzo[a,d]cycloheptene-2,8-dione**

A solution of acetal **33** (4.5 mg, 16 μmol) in  $CH_2Cl_2$  (0.5 mL) at 0 °C was treated with *m*-chloroperbenzoic acid (3.5 mg, 20 μmol) and  $BF_3 \cdot OEt_2$  (2.7 μL, 19 μmol) sequentially. After stirring at 0 °C for 10 min and at room temperature for 20 min, the mixture was cooled to 0 °C and  $Et_3N$  (10.9 μL, 78.5 μmol) was added dropwise. The mixture was stirred at 0 °C for 30 min and purified by column chromatography (15% - 25% EtOAc in  $CH_2Cl_2$ ) to give the desired lactone (3.0 mg, 71%) as colorless needles:  $^1H$  NMR (300 MHz,  $CDCl_3$ )  $\delta$  4.40 (app dd,  $J = 10.0, 2.2$  Hz, 1H), 4.23 (dd,  $J = 10.5, 6.1$  Hz, 1H), 4.09 (t,  $J = 10.2, 6.1$  Hz, 1H), 4.00 (dd,  $J = 10.1, 6.1$  Hz, 1H), 2.88 (ddd,  $J = 18.3, 11.2, 4.7$  Hz, 1H), 2.72 (ddd,  $J = 18.3, 9.6, 5.5$  Hz, 1H); 2.21-1.76 (m, 6H), 1.49 (s, 3H), 1.24 (s, 3H);  $^{13}C$  NMR (75 MHz,  $CDCl_3$ )  $\delta$  170.7, 147.4, 83.8, 81.4, 77.4, 66.6, 64.9, 39.1, 30.8, 28.1, 24.4, 20.5, 19.5; IR (neat) 2924,

1748, 1463, 1408, 1229, 1124, 1068  $\text{cm}^{-1}$ ; HRMS (ESI):  $m/z$  calcd for  $\text{C}_{13}\text{H}_{18}\text{O}_6\text{Na}$  ( $\text{M} + \text{Na}$ ) 293.1001, found 293.0988;  $[\alpha]_{\text{D}} = +48.7$  ( $\text{CHCl}_3$ ,  $c$  0.23).

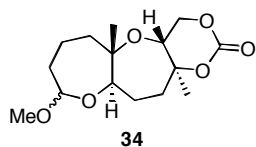

**(4aR,5aS,10aR,12aS)-9-Methoxy-5a,12a-dimethyldecahydro-1,3,5,10-tetraoxabenzob[b]heptalen-2-one (34)**

To diepoxide **8** (145 mg, 276  $\mu\text{mol}$ ) in dichloroethane/toluene (10.6 mL, 5:1, v/v) in a borosilicate flask at room temperature were added activated 4 $\text{\AA}$  molecular sieves (290 mg), anhydrous  $\text{Na}_2\text{S}_2\text{O}_3$  (290 mg, 1.83 mmol), NaOAc (290 mg, 3.53 mmol) and *N*-methylquinolinium hexafluorophosphate (8.0 mg, 28  $\mu\text{mol}$ ). The mixture was photoirradiated with gentle aeration for 2 h while stirring at room temperature. The reaction mixture was filtered through a small plug of silica gel and the residue was washed with EtOAc (40 mL). The filtrate was concentrated and the resulting residue was purified by flash chromatography (25% - 35% EtOAc in hexanes) to provide **34** (44.8 mg, 54.0%, pale yellow liquid) as two diastereomers in an approximately 1:1 ratio:  $^1\text{H}$  NMR (300 MHz,  $\text{CDCl}_3$ )  $\delta$  4.54-4.48 (m, 1H), 4.25-3.98 (m, 3H), 3.92-3.85 (m, 0.5H), 3.56 (dd,  $J = 11.2, 2.4$  Hz, 0.5H), 3.40/3.37 (s, 3H), 3.24 (dd,  $J = 10.8, 3.8$  Hz, 0.5H), 2.26-1.94 (m, 2.5H), 1.91-1.72 (m, 3.5H), 1.65-1.52 (m, 3.5H), 1.47/1.44 (s, 3H), 1.33/1.29 (s, 3H), 1.21-1.18 (m, 0.5H);  $^{13}\text{C}$  NMR (75 MHz,  $\text{CDCl}_3$ )  $\delta$  149.0, 148.6, 105.2, 102.6, 83.3, 83.2, 81.4, 80.3, 79.7, 75.6, 67.0, 67.0, 65.2, 63.8, 56.1, 55.9, 44.6, 43.3, 37.5, 37.0, 35.3, 33.6, 27.6, 26.2, 22.3, 21.6, 19.2, 17.7, 17.0, 16.7; IR (neat) 2940, 1759, 1454, 1384, 1209, 1111, 1053, 1008, 921; HRMS (ESI):  $m/z$  calcd for  $\text{C}_{15}\text{H}_{24}\text{O}_6\text{Na}$  ( $\text{M} + \text{Na}^+$ ) 323.1471, found 323.1500;  $[\alpha]_{\text{D}} = +31.5$  ( $\text{CHCl}_3$ ,  $c$  1.45).

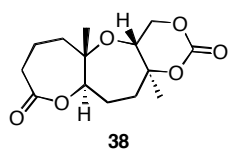

**(4aR,5aS,10aR,12aS)-5a,12a-Dimethyldecahydro-1,3,5,10-tetraoxabenzob[b]heptalen-2,9-dione (38)**

A solution of acetal **34** (15.6 mg, 51.9  $\mu\text{mol}$ ) in  $\text{CH}_2\text{Cl}_2$  (0.5 mL) at 0  $^\circ\text{C}$  was treated with *m*-chloroperbenzoic acid (11.6 mg, 67.5  $\mu\text{mol}$ ) and  $\text{BF}_3 \cdot \text{OEt}_2$  (7.2  $\mu\text{L}$ , 57  $\mu\text{mol}$ ) sequentially. After stirring at 0  $^\circ\text{C}$  for 10 min, then at room temperature for 1 h, the mixture was cooled to 0  $^\circ\text{C}$  and  $\text{Et}_3\text{N}$  (36.2  $\mu\text{L}$ , 256  $\mu\text{mol}$ ) was added dropwise. The mixture was stirred at 0  $^\circ\text{C}$  for 1.5 h, then quenched with a mixture of saturated  $\text{NaHCO}_3$ /saturated  $\text{Na}_2\text{S}_2\text{O}_3$  (4 mL, 1:1, v/v). The mixture was poured onto water (5 mL) and extracted with  $\text{Et}_2\text{O}$  (3 x 25 mL). The extracts were dried over  $\text{MgSO}_4$ , filtered and concentrated, and the resulting residue was purified by column chromatography (10% - 20% EtOAc in  $\text{CH}_2\text{Cl}_2$ ) to give lactone **21** (9.9 mg, 67%) as a white crystalline solid:  $^1\text{H}$  NMR (300 MHz,  $\text{CDCl}_3$ )  $\delta$  4.26-4.20 (m, 2H), 4.14-4.06 (m, 2H), 2.70-2.55 (m, 2H), 2.35-2.23 (m, 2H), 1.99-1.81 (m, 4H), 1.77-1.68 (m, 2H), 1.46 (s, 3H), 1.31 (s, 3H);  $^{13}\text{C}$  NMR (75 MHz,  $\text{CDCl}_3$ )  $\delta$  173.3, 148.6, 84.3, 82.2, 78.9, 66.8, 64.3, 43.2, 36.2, 33.6, 26.6, 22.0, 20.0, 15.8; IR (neat) 2989, 2941, 2871, 1748, 1727, 1501, 1454, 1365, 1328, 1272, 1212, 1098, 1040  $\text{cm}^{-1}$ ; HRMS (ESI):  $m/z$  calcd for  $\text{C}_{14}\text{H}_{20}\text{O}_6\text{Na}$  ( $\text{M} + \text{Na}$ ) 307.1158, found 307.1158;  $[\alpha]_{\text{D}} = +50.4$  ( $\text{CHCl}_3$ ,  $c$  0.42).

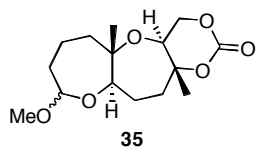

**(4aS,5aS,10aR,12aR)-9-Methoxy-5a,12a-dimethyldecahydro-1,3,5,10-tetraoxabenzob[b]heptalen-2-one (35)**

To diepoxide **9** (48.2 mg, 91.9  $\mu\text{mol}$ ) in dichloroethane/toluene (3.5 mL, 5:1, v/v) in a borosilicate flask at room temperature were added activated 4 $\text{\AA}$  molecular sieves (96 mg), anhydrous  $\text{Na}_2\text{S}_2\text{O}_3$  (96 mg), NaOAc (96 mg) and *N*-methylquinolinium hexafluorophosphate (2.6 mg, 9.2  $\mu\text{mol}$ ). The mixture was photoirradiated with gentle aeration for 3 h while stirring at room temperature. The reaction mixture was filtered

through a small plug of silica gel and the residue was washed with EtOAc (30 mL). The filtrate was concentrated and the resulting residue was purified by flash chromatography (25% - 35% EtOAc in hexanes) to provide **23** (22 mg, 79%, pale yellow needles) as two diastereomers in about 1:1 ratio:  $^1\text{H NMR}$  (300 MHz,  $\text{CDCl}_3$ )  $\delta$  4.69 (dd,  $J = 3.8, 2.2$  Hz, 0.5H), 4.54 (dd,  $J = 8.9, 5.7$  Hz, 0.5H), 4.17 (dd,  $J = 10.7, 6.6$  Hz, 1H), 4.02 (t,  $J = 10.7$  Hz, 1H), 3.90 (dd,  $J = 10.7, 6.6$  Hz, 1H), 3.90-3.85 (m, 0.5H), 3.52 (dd,  $J = 10.1, 0.8$  Hz, 0.5H), 3.40/3.37 (s, 3H), 2.08-2.00 (m, 2H), 1.89-1.53 (m, 8H), 1.44 (s, 3H), 1.21/1.17 (s, 3H);  $^{13}\text{C NMR}$  (75 MHz,  $\text{CDCl}_3$ )  $\delta$  151.6, 148.0, 102.7, 102.4, 83.6, 83.6, 81.3, 80.6, 78.8, 74.1, 67.0 (2C), 64.0, 63.9, 56.0, 55.8, 40.5, 40.2, 39.8, 39.5, 33.7, 33.4, 27.3 (2C), 20.8, 20.3, 19.4, 19.3, 19.3, 17.5; IR (neat) 2940, 1755, 1461, 1382, 1246, 1223, 1116, 1051, 913  $\text{cm}^{-1}$ ; HRMS (ESI):  $m/z$  calcd for  $\text{C}_{15}\text{H}_{24}\text{O}_6\text{Na}$  ( $\text{M} + \text{Na}^+$ ) 323.1471, found 323.1462;  $[\alpha]_{\text{D}} = +26.6$  ( $\text{CHCl}_3$ ,  $c$  0.55).

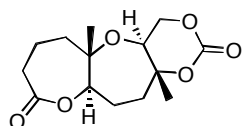

**(4a*S*,5a*S*,10a*R*,12a*R*)-5a,12a-Dimethyldecahydro-1,3,5,10-tetraoxabenzob[*b*]heptalene-2,9-dione**

A solution of acetal **35** (19.0 mg, 63.2  $\mu\text{mol}$ ) in  $\text{CH}_2\text{Cl}_2$  (2.0 mL) at 0  $^\circ\text{C}$  was treated with *m*-chloroperbenzoic acid (14.2 mg, 82.2  $\mu\text{mol}$ ) and  $\text{BF}_3 \cdot \text{OEt}_2$  (9.5  $\mu\text{L}$ , 76  $\mu\text{mol}$ ) sequentially. The mixture was stirred at 0  $^\circ\text{C}$  for 10 min, and then at room temperature for 1 h. After that time, the mixture was cooled to 0  $^\circ\text{C}$  and  $\text{Et}_3\text{N}$  (44.0  $\mu\text{L}$ , 316  $\mu\text{mol}$ ) was added dropwise. The mixture was stirred at 0  $^\circ\text{C}$  for 30 min, then concentrated, and the resulting residue was purified by column chromatography (15% - 25% EtOAc in  $\text{CH}_2\text{Cl}_2$ ) to give the desired lactone (14.4 mg, 80.0%) as colorless needles:  $^1\text{H NMR}$  (600 MHz,  $\text{CDCl}_3$ )  $\delta$  4.47 (dd,  $J = 10.4$  Hz, 1H), 4.20 (dd,  $J = 10.7, 6.4$  Hz, 1H), 4.05 (t,  $J = 10.7$  Hz, 1H), 3.98 (dd,  $J = 10.5, 6.4$  Hz, 1H), 2.70 (dt,  $J = 14.1, 14.1, 2.2$  Hz, 1H), 2.64 (ddd,  $J = 14.1, 5.8, 1.3$  Hz, 1H), 2.12 (ddd,  $J = 13.6, 5.9, 2.0$  Hz, 1H), 2.07-1.98 (m, 3H), 1.90 (dddd,  $J = 14.7, 5.8, 2.6, 1.0$  Hz, 1H), 1.84 (app dt,  $J = 13.6, 13.6, 1.7$  Hz, 1H), 1.78-1.70 (m, 2H), 1.48 (s, 3H), 1.14 (s, 3H);  $^{13}\text{C NMR}$  (151 MHz,  $\text{CDCl}_3$ )  $\delta$  173.4, 147.8, 83.6, 82.7, 79.0, 66.8, 64.6, 39.3, 38.3, 33.4, 26.4, 20.4, 19.14, 19.10; IR (neat) 2984, 2941, 1747, 1732, 1444, 1388, 1274, 1252, 1200, 1116, 1100, 1070, 1049  $\text{cm}^{-1}$ ; HRMS (EI):  $m/z$  calcd for  $\text{C}_{14}\text{H}_{20}\text{O}_6$  ( $\text{M}^+$ ) 284.1260, found 284.1254;  $[\alpha]_{\text{D}} = +17.2$  ( $\text{CHCl}_3$ ,  $c$  0.52).

Key observations from NOESY spectrum

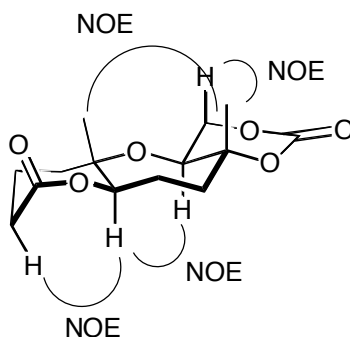

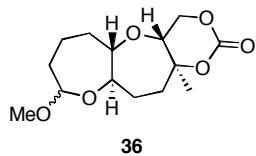

36

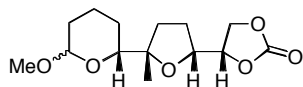

37

(4*aR*,5*aS*,10*aR*,12*aS*)-9-Methoxy-12a-methyldecahydro-1,3,5,10-tetraoxabenzob[heptalen]-2-one (**36**) and (*S*)-4-((2*R*,5*S*)-tetrahydro-5-((*R*)-tetrahydro-6-methoxy-2*H*-pyran-2-yl)-2-methylfuran-2-yl)-

### 1,3-dioxolan-2-one (**37**)

To diepoxide **10** (52.8 mg, 103  $\mu\text{mol}$ ) in dichloroethane/toluene (4.0 mL, 5:1, v/v) in a borosilicate flask at room temperature were added activated 4 $\text{\AA}$  molecular sieves (106 mg), anhydrous  $\text{Na}_2\text{S}_2\text{O}_3$  (106 mg), NaOAc (106 mg) and *N*-methylquinolinium hexafluorophosphate (3.0 mg, 10  $\mu\text{mol}$ ). The mixture was photoirradiated with gentle aeration for 4 h while stirring at room temperature. The reaction mixture was filtered through a small plug of silica gel and the residue was washed with EtOAc (20 mL). The filtrate was concentrated and the resulting residue was purified by flash chromatography (5% - 20% EtOAc in  $\text{CH}_2\text{Cl}_2$ ) to provide the *endo*, *endo* product **36** (8.8 mg, 30%) as a colorless oil and the *exo*, *exo* product **37** (7.3 mg, 25%) as a white solid. **36** (dr = 2.3:1):  $^1\text{H}$  NMR (600 MHz,  $\text{CDCl}_3$ )  $\delta$  4.56 (dd,  $J = 8.8, 5.8$  Hz, 70% of 1H), 4.49-4.46 (m, 30% of 1H), 4.39-4.34 (m, 1H), 4.11 (t,  $J = 10.6$  Hz, 70% of 1H), 4.10 (t,  $J = 10.6$  Hz, 30% of 1H), 3.94 (dd,  $J = 11.3, 6.5$  Hz, 70% of 1H), 3.84 (dd,  $J = 11.0, 6.3$  Hz, 30% of 1H), 3.68 (dt,  $J = 8.5, 4.5$  Hz, 70% of 1H), 3.62-3.59 (m, 30% of 1H), 3.49-3.47 (m, 30% of 1H), 3.42 (s, 30% of 3H), 3.38 (s, 70% of 3H), 3.37-3.33 (70% of 1H), 2.22-1.97 (m, 4H), 1.92-1.78 (m, 2H), 1.65-1.59 (m, 2H), 1.46 (s, 30% of 3H), 1.43 (s, 70% of 3H), 1.38-1.33 (m, 1H), 1.28-1.25 (m, 1H);  $^{13}\text{C}$  NMR (151 MHz,  $\text{CDCl}_3$ )  $\delta$  149.0 (minor), 148.9 (major), 106.9 (minor), 102.6 (major), 86.4 (major), 83.3 (minor), 82.6 (minor), 82.4 (major), 79.5 (minor), 75.2 (minor), 74.0 (major), 73.2 (minor), 73.1 (major), 66.5 (major), 56.1 (minor), 55.9 (major), 39.5 (minor), 36.7 (major), 35.9 (minor), 35.6 (major), 34.9 (minor), 33.5 (major), 29.7 (major), 28.6 (minor), 28.0 (minor), 21.0 (major), 18.9 (major), 17.9 (minor); IR (neat) 2939, 1755, 1455, 1384, 1255, 1205, 1109, 1042, 999  $\text{cm}^{-1}$ ; HRMS (EI):  $m/z$  calcd for  $\text{C}_{14}\text{H}_{22}\text{O}_6$  ( $\text{M}^+$ ) 286.1416, found 286.1414;  $[\alpha]_{\text{D}} = +11.8$  ( $\text{CHCl}_3$ ,  $c$  0.85). **37** (dr = 2:1):  $^1\text{H}$  NMR (600 MHz,  $\text{CDCl}_3$ )  $\delta$  4.71 (br s, 67% of 1H), 4.61-4.56 (m, 1H), 4.54-4.50 (m, 1H), 4.44-4.41 (m, 1H), 4.32 (dd,  $J = 9.5, 2.0$  Hz, 33% of 1H), 4.02 (dd,  $J = 7.1, 4.9$  Hz, 33% of 1H), 3.98 (dd,  $J = 7.4, 4.4$  Hz, 67% of 1H), 3.73-3.70 (ddd,  $J = 11.6, 4.2, 2.0$  Hz, 67% of 1H), 3.48 (s, 33% of 3H), 3.40 (ddd,  $J = 11.3, 4.7, 1.9$  Hz, 67% of 1H), 3.33 (s, 67% of 3H), 2.05-1.95 (m, 4H), 1.90-1.78 (m, 3H), 1.73-1.65 (m, 1H), 1.60 (s, 3H), 1.55-1.48 (m, 1H), 1.31-1.22 (m, 1H), 1.28 (s, 3H);  $^{13}\text{C}$  NMR (75 MHz,  $\text{CDCl}_3$ )  $\delta$  155.3 (major), 151.1 (minor), 103.7 (minor), 98.7 (major), 82.2 (major, 2C), 81.9 (minor), 79.6 (minor), 79.2 (major), 69.7 (major), 66.0 (major), 56.3 (minor), 54.7 (major), 35.1 (major), 34.7 (minor), 31.3 (minor), 29.9 (major), 27.6 (minor), 27.3 (major), 26.7 (minor), 26.3 (major), 22.0 (minor), 20.9 (minor), 20.5 (major), 17.8 (major); IR (neat) 2943, 1798, 1455, 1374, 1166, 1033, 949  $\text{cm}^{-1}$ ; HRMS (EI):  $m/z$  calcd for  $\text{C}_{14}\text{H}_{22}\text{O}_6$  ( $\text{M}^+$ ) 286.1416, found 286.1419;  $[\alpha]_{\text{D}} = -24.1$  ( $\text{CHCl}_3$ ,  $c$  0.71).

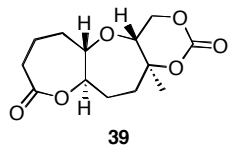

39

### (4*aR*,5*aS*,10*aR*,12*aS*)-12a-Methyldecahydro-1,3,5,10-tetraoxabenzob[heptalene]-2,9-dione (**39**)

To a solution of acetal **36** (8.0 mg, 28  $\mu\text{mol}$ ) in  $\text{CH}_2\text{Cl}_2$  (0.5 mL) at 0  $^\circ\text{C}$  were added *m*-chloroperbenzoic acid (6.2 mg, 36  $\mu\text{mol}$ ) and  $\text{BF}_3 \cdot \text{OEt}_2$  (4.2  $\mu\text{L}$ , 33  $\mu\text{mol}$ ) sequentially. After stirring at room temperature for 30 min, the mixture was cooled to 0  $^\circ\text{C}$  and  $\text{Et}_3\text{N}$  (19.4  $\mu\text{L}$ , 140  $\mu\text{mol}$ ) was added dropwise. The mixture was stirred at 0  $^\circ\text{C}$  for 30 min, then concentrated, and the resulting residue was purified by column chromatography (10% - 20% EtOAc in  $\text{CH}_2\text{Cl}_2$ ) to give lactone **39** (5.3 mg, 70.2%) as a white crystalline solid:  $^1\text{H}$  NMR

(600 MHz, CDCl<sub>3</sub>) δ 4.43-4.39 (m, 1H), 4.40 (dd, *J* = 10.4, 6.5 Hz, 1H), 4.13 (dd, *J* = 11.2, 10.5 Hz, 1H), 3.86 (dd, *J* = 11.3, 6.5 Hz, 1H), 3.53 (ddd, *J* = 10.6, 8.0, 3.4 Hz, 1H), 2.70-2.61 (m, 2H), 2.22-2.17 (m, 3H), 2.07-2.01 (m, 2H), 1.92 (ddd, *J* = 15.4, 9.6, 2.2 Hz, 1H), 1.77-1.73 (m, 2H), 1.48 (s, 3H); <sup>1</sup>H NMR (500 MHz, C<sub>6</sub>D<sub>6</sub>) δ 3.58 (dd, *J* = 10.0, 6.6 Hz, 1H), 3.46 (dd, *J* = 11.2, 10.2 Hz, 1H), 3.38-3.34 (m, 1H), 2.66 (dd, *J* = 11.2, 6.6 Hz, 1H), 2.58 (ddd, *J* = 11.2, 7.8, 3.3 Hz, 1H), 2.22-2.18 (m, 1H), 1.73-1.65 (m, 2H), 1.52 (dddd, *J* = 15.8, 8.8, 3.8, 1.4 Hz, 1H), 1.42-1.38 (m, 1H), 1.30 (ddd, *J* = 14.4, 8.8, 1.4 Hz, 1H), 1.22 (dddd, *J* = 17.1, 11.6, 5.2, 1.5 Hz, 1H), 1.16-1.11 (m, 2H), 0.92-0.84 (m, 1H), 0.80 (s, 3H); <sup>13</sup>C NMR (151 MHz, CDCl<sub>3</sub>) δ 173.9, 148.2, 85.5, 81.9, 81.2, 78.4, 66.5, 35.7, 34.5, 33.6, 27.5, 21.0, 19.2; IR (neat) 2922, 2850, 1747, 1453, 1387, 1273, 1204, 1106, 1058, 1015 cm<sup>-1</sup>; HRMS (EI): *m/z* calcd for C<sub>13</sub>H<sub>18</sub>O<sub>6</sub> (M<sup>+</sup>) 270.1103, found 270.1111; [α]<sub>D</sub> = +12.7 (CHCl<sub>3</sub>, *c* 0.26).

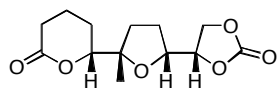

**(R)-Tetrahydro-6-((2S,5R)-tetrahydro-5-methyl-5-((S)-2-oxo-1,3-dioxolan-4-yl)furan-2-yl)pyran-2-one**

To a solution of acetal **37** (6.8 mg, 24 μmol) in CH<sub>2</sub>Cl<sub>2</sub> (0.5 mL) at 0 °C were added *m*-chloroperbenzoic acid (5.3 mg, 31 μmol) and BF<sub>3</sub>·OEt<sub>2</sub> (4.0 μL, 28 μmol) sequentially. After stirred at room temperature for 30 min, the mixture was cooled to 0 °C and Et<sub>3</sub>N (16.5 μL, 118 μmol) was added dropwise. The mixture was stirred at 0 °C for 30 min, then concentrated, and the resulting residue was purified by column chromatography (15% - 25% EtOAc in CH<sub>2</sub>Cl<sub>2</sub>) to give the desired lactone (5.2 mg, 81%) as a white solid: <sup>1</sup>H NMR (500 MHz, CDCl<sub>3</sub>) δ 4.64 (dd, *J* = 8.4, 6.0 Hz, 1H), 4.52 (t, *J* = 8.8 Hz, 1H), 4.45 (dd, *J* = 8.8, 6.0 Hz, 1H), 4.30 (dd, *J* = 11.4, 4.6, 3.0 Hz, 1H), 4.10 (dt, *J* = 7.2, 4.6 Hz, 1H), 2.62 (dddd, *J* = 17.8, 6.6, 4.8, 1.4 Hz, 1H), 2.46 (ddd, *J* = 17.8, 9.3, 7.0 Hz, 1H), 2.19-2.12 (m, 1H), 2.07-2.02 (m, 1H), 2.01-1.93 (m, 3H), 1.90-1.85 (m, 1H), 1.84-1.79 (m, 1H), 1.28 (s, 3H); <sup>13</sup>C NMR (125 MHz, CDCl<sub>3</sub>) δ 171.1, 155.2, 83.0, 81.1, 80.7, 79.0, 66.1, 34.5, 29.9, 26.4, 24.8, 20.7, 18.5; IR (neat) 2957, 2929, 1789, 1731, 1242, 1173, 1084, 1049, 1018, 771 cm<sup>-1</sup>; HRMS (EI): *m/z* calcd for C<sub>13</sub>H<sub>18</sub>O<sub>6</sub> (M<sup>+</sup>) 270.1103, found 270.1104; [α]<sub>D</sub> = -42.8 (CHCl<sub>3</sub>, *c* 0.50).



Coordinates for all of the TSs.

The geometries of the stationary points (ground state structures and transition state structures) were optimized at B3LYP/6-31G(d) level. Ground state structures have all positive frequencies and TS structures have one imaginary frequencies corresponding to motions along reaction coordinates.

TS1

Electronic Energy: -654.801107 Hartree

|   |           |           |           |
|---|-----------|-----------|-----------|
| O | 2.908183  | 0.145304  | 0.385906  |
| C | 3.731982  | 1.219492  | -0.205787 |
| C | 1.585963  | 0.027196  | -1.819110 |
| C | 1.730256  | -0.455806 | -0.385927 |
| C | 0.930360  | 0.283134  | 0.641281  |
| C | 0.663739  | -0.223573 | 2.013053  |
| C | 1.819736  | -1.963716 | -0.253651 |
| H | 0.655100  | -0.374024 | -2.227483 |
| H | 1.540319  | 1.116977  | -1.895697 |
| H | 0.822569  | 1.345457  | 0.447786  |
| H | 0.859678  | -2.416380 | -0.521607 |
| H | 2.584529  | -2.350543 | -0.932382 |
| H | 2.087100  | -2.263247 | 0.761544  |
| H | 0.308757  | -1.256026 | 2.003755  |
| H | 4.203080  | 0.863055  | -1.123202 |
| H | 4.486940  | 1.422182  | 0.552894  |
| H | 1.604521  | -0.200945 | 2.578965  |
| H | 3.149027  | 2.123092  | -0.402547 |
| H | 2.412686  | -0.338478 | -2.434160 |
| H | -0.054617 | 0.406745  | 2.540696  |
| O | -2.774376 | 1.282710  | 0.380185  |
| C | -2.217261 | 0.124852  | 0.007286  |
| O | -0.982847 | -0.085203 | -0.188393 |
| O | -3.161469 | -0.801566 | -0.158610 |
| C | -2.776717 | -2.170608 | -0.571903 |
| H | -2.106165 | -2.606530 | 0.169923  |
| H | -3.721562 | -2.705578 | -0.609583 |
| H | -2.302950 | -2.136762 | -1.553741 |
| C | -1.953179 | 2.502158  | 0.496612  |
| H | -2.681310 | 3.304532  | 0.582247  |
| H | -1.339429 | 2.452121  | 1.398376  |
| H | -1.340451 | 2.629130  | -0.397970 |

TS2

Electronic Energy: -654.807793 Hartree

|   |           |           |           |
|---|-----------|-----------|-----------|
| C | -0.701275 | 1.632401  | -1.841478 |
| O | -0.009792 | 0.337241  | -1.790982 |
| C | 0.631331  | -0.033091 | -0.502573 |
| C | 2.114849  | -0.254321 | -0.711291 |
| C | -0.268882 | -1.229777 | -0.281408 |
| C | 0.007893  | -2.470642 | -1.047088 |
| C | -1.640867 | -1.001252 | 0.256233  |
| O | 0.674942  | -1.750694 | 1.579590  |
| C | 0.537546  | -2.176865 | 2.764099  |
| O | 0.412318  | -3.458939 | 3.117028  |
| C | 0.483945  | -4.519778 | 2.091065  |
| O | 0.535429  | -1.404974 | 3.855198  |
| C | 0.721248  | 0.054459  | 3.721670  |
| H | -2.026354 | -1.896077 | 0.750279  |
| H | -1.695131 | -0.149511 | 0.935461  |
| H | 0.438136  | 0.732371  | 0.254221  |
| H | 1.031900  | -2.816778 | -0.894331 |
| H | -0.700156 | -3.269340 | -0.824050 |
| H | -0.083858 | -2.211843 | -2.113542 |
| H | 2.301953  | -0.930524 | -1.549125 |
| H | -0.989286 | 1.757408  | -2.884684 |
| H | -0.022995 | 2.435820  | -1.539080 |
| H | 2.591119  | 0.702204  | -0.945165 |
| H | -1.595735 | 1.634631  | -1.208551 |
| H | -2.310088 | -0.808464 | -0.596479 |
| H | 2.574505  | -0.661881 | 0.192554  |
| H | 1.349101  | -4.357088 | 1.446789  |
| H | 0.588917  | -5.435806 | 2.666239  |
| H | -0.440973 | -4.533839 | 1.512123  |
| H | 0.797346  | 0.403677  | 4.747874  |
| H | 1.636715  | 0.263233  | 3.166364  |
| H | -0.146753 | 0.494983  | 3.227694  |

TS3\_exo

Electronic Energy: -691.912189235 Hartree

|   |           |           |           |
|---|-----------|-----------|-----------|
| O | -1.804015 | -1.086175 | 0.167616  |
| C | -3.037005 | -0.826979 | -0.614784 |
| C | -3.632731 | 0.546424  | -0.364710 |
| C | -2.563700 | 1.634738  | -0.503288 |
| C | -1.495664 | 1.444133  | 0.581553  |

C -0.919886 0.033674 0.669771  
C -0.253554 -0.515202 -0.522756  
C 0.656794 -1.730199 -0.523955  
C -0.403177 -0.331270 2.045105  
H -0.576902 -0.120724 -1.477675  
H -4.083487 0.586798 0.634436  
H -3.009677 2.626612 -0.386198  
H -4.443811 0.689043 -1.087650  
H -2.123762 1.613600 -1.509622  
H -1.932871 1.687891 1.556371  
H -0.646615 2.121764 0.434329  
H 0.803876 -2.088018 -1.546589  
O 1.944349 -1.422080 0.040638  
H 0.242749 -2.532710 0.085243  
H 0.352859 0.400359 2.349923  
H -1.224864 -0.283143 2.765352  
H 0.037902 -1.328630 2.088325  
H -2.776392 -0.967334 -1.668218  
H -3.692041 -1.643215 -0.303233  
C 2.320289 -0.171740 -0.242781  
O 3.563335 0.042695 0.083925  
O 1.528679 0.639489 -0.737188  
C 4.086452 1.381212 -0.152580  
H 5.119226 1.335174 0.185923  
H 4.032278 1.613632 -1.217162  
H 3.515826 2.108727 0.427072

TS3\_endo

Electronic Energy: -691.918988090 Hartree

O 1.860390 1.146094 0.310337  
C 2.911233 1.040794 -0.714536  
C 3.467838 -0.373441 -0.830704  
C 2.385886 -1.438084 -1.052978  
C 1.492095 -1.650113 0.193008  
C 0.903184 -0.422472 0.803950  
C 0.522402 0.697433 -0.070927  
C -0.557816 1.710029 0.285524  
C 0.729649 -0.366881 2.274929  
H 0.468907 0.448616 -1.132133  
H 4.052446 -0.613057 0.066083  
H 2.859098 -2.400368 -1.268542  
H 4.169339 -0.374253 -1.672806  
H 1.781161 -1.193832 -1.934745  
H 2.038064 -2.209842 0.958897

H 0.612694 -2.259115 -0.076317  
H -0.253080 2.691321 -0.084141  
O -1.784769 1.422266 -0.390615  
H -0.729517 1.775802 1.362408  
H -0.121728 -1.023454 2.506817  
H 1.606970 -0.769330 2.788777  
H 0.500981 0.629135 2.654742  
H 2.479648 1.393323 -1.657299  
H 3.667185 1.751485 -0.375797  
C -2.321244 0.208532 -0.137783  
O -3.529799 0.164501 -0.653134  
O -1.740781 -0.688185 0.457119  
C -4.247266 -1.085944 -0.501349  
H -5.200669 -0.921818 -0.999795  
H -3.692957 -1.896545 -0.978510  
H -4.394636 -1.304586 0.557898

TS4\_trans\_exo

Electronic Energy: -806.440823512 Hartree

O -1.418502 -0.431474 0.255836  
C -2.697312 0.022304 -0.469949  
C -2.897493 1.519268 -0.360454  
C -1.604458 2.296206 -0.621429  
C -0.577666 1.977286 0.470550  
C -0.314868 0.485473 0.663732  
C 0.235795 -0.245021 -0.495681  
C 0.832834 -1.639836 -0.421936  
C 0.157474 0.128042 2.059064  
H -0.021082 0.146959 -1.471275  
H -3.284722 1.737995 0.641430  
H -1.808518 3.370772 -0.614776  
H -3.681308 1.792159 -1.074785  
H -1.211948 2.071452 -1.622625  
H -0.933150 2.385931 1.423188  
H 0.389572 2.448756 0.261812  
H 0.864716 -2.092611 -1.416493  
O 2.176732 -1.601701 0.098543  
H 0.264869 -2.278526 0.252505  
H 1.048547 0.715284 2.306058  
H -0.624727 0.384983 2.779070  
H 0.393769 -0.931822 2.172041  
H -2.517907 -0.315089 -1.499904  
C 2.796968 -0.470605 -0.235548  
O 4.063926 -0.500989 0.062273

O 2.176383 0.470091 -0.751025  
C 4.841618 0.696313 -0.228522  
H 5.851570 0.450766 0.092308  
H 4.809007 0.904043 -1.299031  
H 4.444355 1.540256 0.337807  
O -3.718145 -0.636308 0.128294  
C -3.856082 -2.033309 -0.174951  
H -4.821011 -2.334998 0.232079  
H -3.846535 -2.195630 -1.259906  
H -3.059508 -2.614360 0.299867

TS4\_trans\_endo

Electronic Energy: -806.447709573 Hartree

O -1.514269 -0.446508 0.455266  
C -2.588468 -0.135915 -0.561221  
C -2.710533 1.368142 -0.758856  
C -1.396779 2.078148 -1.114469  
C -0.394976 2.164447 0.062043  
C -0.076777 0.889080 0.762420  
C -0.145360 -0.371117 -0.001167  
C 0.673987 -1.590545 0.399441  
C 0.134908 0.929661 2.229093  
H -0.080935 -0.233821 -1.083977  
H -3.149261 1.789342 0.153348  
H -1.619249 3.107238 -1.411177  
H -3.439873 1.521018 -1.561376  
H -0.930271 1.611240 -1.990287  
H -0.725223 2.909174 0.793752  
H 0.582292 2.510870 -0.314652  
H 0.152704 -2.489551 0.065255  
O 1.938314 -1.624642 -0.276062  
H 0.828419 -1.657460 1.478992  
H 0.991982 1.589417 2.417959  
H -0.733063 1.393279 2.711572  
H 0.331800 -0.039888 2.683532  
H -2.256695 -0.661811 -1.471373  
C 2.722630 -0.539574 -0.141819  
O 3.909236 -0.806777 -0.638389  
O 2.361687 0.525451 0.348086  
C 4.880378 0.269652 -0.609978  
H 5.773091 -0.150059 -1.069511  
H 4.511356 1.122090 -1.183622  
H 5.076738 0.566872 0.421767  
O -3.751337 -0.619888 -0.062516

C -3.919101 -2.046881 -0.092452  
H -4.957119 -2.231977 0.182995  
H -3.730835 -2.435617 -1.100964  
H -3.254361 -2.532035 0.628491

TS4\_cis\_exo

Electronic Energy: -806.443127663 Hartree

O 1.467844 0.178356 0.944665  
C 2.795512 0.137066 0.195422  
C 3.106456 -1.265374 -0.293084  
C 1.927390 -1.878452 -1.053099  
C 0.744105 -2.068354 -0.096915  
C 0.364568 -0.821989 0.697585  
C -0.020481 0.377810 -0.062306  
C -0.746010 1.572927 0.530136  
C -0.324769 -1.126956 2.011475  
H 0.405421 0.481612 -1.050667  
H 3.366175 -1.890281 0.569707  
H 2.212359 -2.852787 -1.460271  
H 3.997040 -1.191400 -0.924434  
H 1.660956 -1.251137 -1.911751  
H 0.986719 -2.862061 0.619025  
H -0.157618 -2.387504 -0.632361  
H -0.689667 2.422993 -0.155174  
O -2.133750 1.278615 0.774581  
H -0.323764 1.851996 1.494539  
H -1.213317 -1.738237 1.820204  
H 0.349930 -1.707370 2.647204  
H -0.627791 -0.230753 2.555698  
C -2.633035 0.451743 -0.149183  
O -3.928960 0.346797 -0.048291  
O -1.899338 -0.126416 -0.957878  
C -4.590749 -0.549660 -0.985276  
H -5.643428 -0.499842 -0.715428  
H -4.430385 -0.197722 -2.005526  
H -4.202515 -1.562518 -0.865762  
H 3.463852 0.476973 0.993946  
O 2.753552 1.014950 -0.855753  
C 2.983252 2.396904 -0.533009  
H 3.950030 2.517135 -0.031696  
H 2.995858 2.931594 -1.482905  
H 2.187919 2.796906 0.106589

TS4\_cis\_endo

Electronic Energy: -806.450332320 Hartree

O 1.584817 0.089738 1.002323  
C 2.763452 0.267130 0.071709  
C 3.007227 -1.011904 -0.721314  
C 1.784396 -1.513009 -1.500725  
C 0.690560 -2.107994 -0.582267  
C 0.256767 -1.257602 0.561849  
C 0.261121 0.203715 0.399354  
C -0.670964 1.108463 1.194531  
C -0.103612 -1.917336 1.839370  
H 0.325449 0.552632 -0.630921  
H 3.362310 -1.786816 -0.031519  
H 2.095887 -2.311640 -2.179941  
H 3.827122 -0.796138 -1.413654  
H 1.383528 -0.713716 -2.131881  
H 0.995952 -3.092315 -0.212761  
H -0.236147 -2.262402 -1.160404  
H -0.162194 2.052766 1.395845  
O -1.826658 1.469021 0.428889  
H -0.979035 0.666126 2.144959  
H -1.051174 -2.445641 1.661365  
H 0.642090 -2.672175 2.106779  
H -0.247402 -1.227416 2.670426  
C -2.582735 0.444443 -0.014538  
O -3.692397 0.927899 -0.529422  
O -2.255608 -0.733094 0.046300  
C -4.614085 -0.039417 -1.090676  
H -5.448809 0.553324 -1.459951  
H -4.134413 -0.585108 -1.905762  
H -4.943083 -0.734686 -0.316183  
H 3.556745 0.460261 0.802042  
O 2.548710 1.321518 -0.771683  
C 2.800066 2.631098 -0.227753  
H 3.837235 2.706257 0.116700  
H 2.632051 3.333306 -1.044068  
H 2.119820 2.857196 0.600432

TS5\_trans\_exo

Electronic Energy: -767.119183783 Hartree

O 1.398326 -0.442959 -0.391191  
C 2.686244 0.062576 0.319098  
C 2.855958 1.556942 0.142029  
C 1.557756 2.329729 0.398367  
C 0.511357 1.949876 -0.655541  
C 0.279615 0.454055 -0.743311  
C -0.224099 -0.304388 0.406322  
C -0.857307 -1.671307 0.246228  
H 0.043917 0.049632 1.393419  
H 3.220584 1.738491 -0.875573  
H 1.749759 3.404863 0.342586  
H 3.649725 1.870100 0.828544  
H 1.186964 2.139967 1.414962  
H 0.840901 2.303781 -1.638574  
H -0.459162 2.417666 -0.453134  
H -0.961168 -2.167475 1.214816  
O -2.160489 -1.556195 -0.355830  
H -0.270730 -2.294393 -0.429011  
H 2.509176 -0.236781 1.360718  
C -2.795198 -0.460197 0.070874  
O -4.045056 -0.451254 -0.294689  
O -2.199452 0.411890 0.715557  
C -4.834690 0.714140 0.080261  
H -5.828741 0.508166 -0.310509  
H -4.851890 0.811991 1.166676  
H -4.410831 1.609126 -0.378253  
O 3.705216 -0.606064 -0.259545  
C 3.871839 -1.987410 0.103008  
H 4.840148 -2.286912 -0.297057  
H 3.870697 -2.102034 1.193782  
H 3.083651 -2.601285 -0.342946  
H -0.110207 0.127645 -1.708858

TS5\_trans\_endo

Electronic Energy: -767.120970326 Hartree

O -1.454655 -0.463902 0.486912  
C -2.635508 0.017389 -0.371015  
C -2.721480 1.534719 -0.332802  
C -1.409161 2.263650 -0.657466  
C -0.344450 2.108810 0.449773



C -0.005494 0.707959 0.797179  
C -0.135783 -0.418577 -0.116632  
C 0.698027 -1.654914 0.180276  
H -0.162931 -0.183388 -1.183026  
H -3.089856 1.821426 0.658979  
H -1.615013 3.332760 -0.761267  
H -3.494875 1.821032 -1.053565  
H -1.012177 1.938572 -1.627096  
H -0.648782 2.639937 1.357585  
H 0.607093 2.562448 0.130306  
H 0.266719 -2.536283 -0.296736  
O 2.011613 -1.530369 -0.384155  
H 0.765681 -1.826935 1.259634  
H -2.397684 -0.383914 -1.368348  
C 2.737728 -0.458758 -0.020251  
O 3.969053 -0.612079 -0.443874  
O 2.302852 0.514238 0.594405  
C 4.894008 0.473208 -0.170512  
H 5.838653 0.144714 -0.599132  
H 4.545632 1.389599 -0.650543  
H 4.984203 0.621397 0.906869  
O -3.746165 -0.518897 0.174187  
C -3.968105 -1.923435 -0.047361  
H -4.977172 -2.125535 0.310470  
H -3.900937 -2.158814 -1.116421  
H -3.248614 -2.521710 0.518883  
H 0.219781 0.452462 1.826473

TS5\_cis\_exo

Electronic Energy: -767.121585241 Hartree

O 1.421256 -0.296728 -1.035370  
C 2.772929 -0.087101 -0.326920  
C 3.043266 1.390840 -0.113438  
C 1.866558 2.101958 0.563786  
C 0.650213 2.078431 -0.370118  
C 0.315499 0.692294 -0.882827  
C -0.024250 -0.408857 0.017040  
C -0.800075 -1.618858 -0.458845  
H 0.414201 -0.404797 1.005836  
H 3.257304 1.853503 -1.084071  
H 2.133340 3.140959 0.776223  
H 3.953636 1.459885 0.489935  
H 1.643514 1.633323 1.529035  
H 0.841734 2.722665 -1.235525

H -0.250780 2.462483 0.122582  
H -0.843718 -2.379158 0.325659  
O -2.140305 -1.250860 -0.827260  
H -0.351179 -2.040090 -1.359011  
C -2.654338 -0.360728 0.034118  
O -3.933738 -0.196914 -0.160493  
O -1.944338 0.210277 0.865707  
C -4.607051 0.774318 0.689320  
H -5.643336 0.756363 0.358772  
H -4.522850 0.469856 1.733642  
H -4.166075 1.761886 0.543399  
H 3.428150 -0.549637 -1.072277  
O 2.772091 -0.759057 0.861830  
C 3.039002 -2.171940 0.793452  
H 3.999568 -2.354806 0.299826  
H 3.085291 -2.520168 1.825218  
H 2.243667 -2.702468 0.257724  
H -0.232705 0.694319 -1.825699

TS5\_cis\_endo

Electronic Energy: -767.123442672 Hartree

O -1.491047 -0.265733 1.062646  
C -2.780258 -0.077317 0.255690  
C -2.955997 1.391806 -0.105891  
C -1.749426 2.021373 -0.815232  
C -0.545616 2.207148 0.133917  
C -0.108958 0.972815 0.829386  
C -0.252512 -0.370476 0.292947  
C 0.676499 -1.446230 0.832192  
H -0.440051 -0.468271 -0.775666  
H -3.188748 1.949079 0.809219  
H -2.030008 3.012493 -1.182622  
H -3.840099 1.446200 -0.749168  
H -1.472843 1.432677 -1.696339  
H -0.753889 2.984558 0.876437  
H 0.341616 2.542862 -0.426190  
H 0.231944 -2.435089 0.710143  
O 1.894479 -1.490610 0.077368  
H 0.894180 -1.279038 1.892315  
C 2.616553 -0.355303 0.023751  
O 3.783403 -0.618299 -0.516407  
O 2.226441 0.744763 0.405651  
C 4.688554 0.503286 -0.685207  
H 5.577932 0.074203 -1.142395

H 4.237190 1.252294 -1.338660  
H 4.921921 0.941887 0.286490  
H -3.507719 -0.418759 0.999487  
O -2.749262 -0.857023 -0.860605  
C -3.090561 -2.246465 -0.678832  
H -4.091424 -2.335804 -0.243447  
H -3.080593 -2.690273 -1.673983  
H -2.361958 -2.754253 -0.038030  
H 0.260760 1.036622 1.846864

TS6\_exo

Electronic Energy: -652.599425127 Hartree

O 2.120065 0.930672 -0.092684  
C 3.092903 0.335510 -1.034126  
C 2.746874 -1.150755 -1.129200  
C 2.092231 -1.474184 0.230748  
C 1.437174 -0.173387 0.686977  
C 0.431281 0.384747 -0.225893  
C -0.390776 1.634474 0.011580  
C 1.382607 0.089029 2.169783  
H 2.840747 -1.772892 0.970431  
H 1.352042 -2.276844 0.162093  
H 3.640373 -1.755214 -1.303997  
H 2.064228 -1.344334 -1.962335  
H 0.366575 -0.047972 -1.217848  
H 0.675702 -0.613200 2.624630  
H 2.367018 -0.077594 2.615432  
H 1.065678 1.105835 2.409733  
H -0.397316 1.928041 1.063549  
O -1.741911 1.424112 -0.424957  
H 4.065916 0.521890 -0.572100  
H 3.016738 0.892816 -1.968796  
H -0.008656 2.458821 -0.592596  
C -2.175618 0.189194 -0.135761  
O -3.459086 0.080075 -0.332241  
O -1.398211 -0.692175 0.241561  
C -4.051103 -1.230879 -0.105671  
H -5.104756 -1.100217 -0.342492  
H -3.587915 -1.964207 -0.767819  
H -3.916670 -1.518896 0.938061

TS6\_endo

Electronic Energy: -652.595022419 Hartree

O 2.103605 1.080385 0.085335  
C 3.193991 0.475063 -0.670672  
C 3.277862 -0.995563 -0.270226  
C 1.816216 -1.557590 -0.196912  
C 0.978238 -0.495285 0.426718  
C 0.769731 0.695896 -0.405994  
C -0.244042 1.777203 -0.020569  
C 0.574664 -0.588329 1.845377  
H 1.800287 -2.477256 0.393718  
H 1.444184 -1.768794 -1.205526  
H 3.744654 -1.084189 0.715744  
H 3.872152 -1.581869 -0.977408  
H 0.794773 0.495193 -1.476263  
H -0.219458 -1.350820 1.884481  
H 1.394273 -0.971668 2.463269  
H 0.178797 0.338535 2.259678  
H 0.143973 2.354212 0.820608  
O -1.526663 1.302073 0.409813  
H 4.081336 1.039798 -0.378255  
H 3.004995 0.616888 -1.740131  
H -0.387738 2.454277 -0.867839  
C -2.036749 0.189849 -0.158935  
O -3.325024 0.139806 0.096474  
O -1.378017 -0.643006 -0.767409  
C -4.031413 -1.032903 -0.384197  
H -5.062600 -0.883393 -0.070301  
H -3.958705 -1.090927 -1.471544  
H -3.613120 -1.934097 0.068518

TS7\_trans\_exo

Electronic Energy: -767.130911209 Hartree

O -1.701204 0.146569 0.759548  
C -2.718053 0.043042 -0.380391  
C -2.183831 0.967029 -1.473642  
C -1.237547 1.959415 -0.778651  
C -0.710648 1.231298 0.456948  
C 0.008094 -0.023039 0.204055  
C 0.662254 -0.894305 1.256140  
C -0.379470 2.089506 1.652522  
H -1.770773 2.858601 -0.456308

H -0.412686 2.277889 -1.422907  
H -3.007199 1.471794 -1.984821  
H -1.672211 0.351723 -2.220041  
H -0.097850 -0.466249 -0.779653  
H 0.488481 2.712097 1.410432  
H -1.221473 2.748171 1.882210  
H -0.150437 1.505325 2.546028  
H 0.827795 -0.357785 2.192617  
O 1.923205 -1.385713 0.772256  
H 0.053230 -1.778969 1.445177  
C 2.563837 -0.474503 0.030641  
O 3.786332 -0.843970 -0.228306  
O 1.999725 0.557451 -0.347291  
C 4.574867 0.038344 -1.076692  
H 5.534700 -0.463697 -1.176919  
H 4.087163 0.150233 -2.046417  
H 4.688997 1.008952 -0.591553  
H -3.630158 0.395123 0.116320  
O -2.802692 -1.239333 -0.812220  
C -3.583901 -2.134527 0.002547  
H -4.594439 -1.736266 0.147091  
H -3.634426 -3.073712 -0.547806  
H -3.105270 -2.296826 0.973801

TS7\_trans\_endo

Electronic Energy: -767.131811311 Hartree

O -1.705878 0.008189 0.999603  
C -2.787546 -0.073757 -0.034838  
C -2.727720 1.239613 -0.809008  
C -1.230079 1.577866 -1.119193  
C -0.474789 1.278992 0.130001  
C -0.356328 -0.152323 0.443635  
C 0.617600 -0.682620 1.485062  
C -0.102741 2.372162 1.049389  
H -1.140181 2.629989 -1.401025  
H -0.872175 0.946808 -1.938611  
H -3.152432 2.034349 -0.188835  
H -3.306556 1.176048 -1.733795  
H -0.375189 -0.804975 -0.430172  
H 0.828478 2.797020 0.644326  
H -0.853178 3.169028 1.043565  
H 0.096314 2.045540 2.070366  
H 0.887015 0.068264 2.232023  
O 1.800739 -1.204320 0.870677

H 0.161732 -1.534818 1.992358  
C 2.478990 -0.353728 0.072627  
O 3.622066 -0.909519 -0.264027  
O 2.064284 0.741558 -0.282141  
C 4.468310 -0.145388 -1.159247  
H 5.337600 -0.778136 -1.327668  
H 3.942096 0.051226 -2.095374  
H 4.757644 0.795027 -0.686532  
H -3.680648 -0.161343 0.594564  
O -2.616099 -1.138321 -0.874065  
C -2.997861 -2.422440 -0.341473  
H -2.869024 -3.135479 -1.155301  
H -2.362272 -2.704430 0.504680  
H -4.047140 -2.405067 -0.026675

TS7\_cis\_exo

Electronic Energy: -767.129973828 Hartree

O -1.535977 -0.609226 0.020554  
C -2.564893 0.066941 -0.889130  
C -1.987583 1.458192 -1.123424  
C -1.234812 1.793110 0.179190  
C -0.721926 0.451836 0.704387  
C 0.207262 -0.256069 -0.187163  
C 0.889993 -1.574389 0.111950  
C -0.650554 0.291839 2.202007  
H -1.913203 2.230577 0.916041  
H -0.406845 2.490893 0.024174  
H -2.793193 2.164436 -1.332721  
H -1.322241 1.450182 -1.992194  
H 0.286333 0.103433 -1.206662  
H 0.115604 0.968210 2.595577  
H -1.612480 0.563861 2.644727  
H -0.407091 -0.726984 2.510668  
H 0.878001 -1.808942 1.178452  
O 2.251918 -1.539082 -0.343860  
H -2.609614 -0.598062 -1.758980  
H 0.412846 -2.383049 -0.443364  
C 2.814594 -0.339876 -0.146468  
O 4.099662 -0.377077 -0.360217  
O 2.138089 0.641990 0.173921  
C 4.824739 0.879143 -0.233399  
H 5.856596 0.624546 -0.465418  
H 4.430367 1.606141 -0.945282  
H 4.733543 1.254732 0.786929

O -3.730336 0.141423 -0.198805  
C -4.477292 -1.083315 -0.073395  
H -3.956630 -1.790594 0.578860  
H -5.433642 -0.805808 0.369029  
H -4.642366 -1.532268 -1.059912

TS7\_cis\_endo

Electronic Energy: -767.127253140 Hartree

O -1.593857 -0.449339 0.467221  
C -2.555445 0.009364 -0.609675  
C -2.361807 1.519348 -0.743131  
C -0.850371 1.889349 -0.633855  
C -0.267627 1.009829 0.423071  
C -0.206097 -0.413358 0.050251  
C 0.660599 -1.405426 0.810575  
C -0.038968 1.534949 1.784411  
H -0.746559 2.946873 -0.378825  
H -0.339019 1.701653 -1.584881  
H -2.920248 1.984364 0.075094  
H -2.777144 1.887385 -1.685651  
H -0.102832 -0.582407 -1.026865  
H 0.883588 2.131147 1.730872  
H -0.844750 2.216522 2.077350  
H 0.096107 0.764162 2.543088  
H 0.793166 -1.127534 1.859407  
O 1.939326 -1.568157 0.184694  
H -2.266237 -0.561295 -1.506179  
H 0.194753 -2.391441 0.765518  
C 2.649131 -0.448299 -0.054722  
O 3.860161 -0.787773 -0.433744  
O 2.211193 0.692427 0.047211  
C 4.757685 0.297535 -0.780342  
H 5.685864 -0.191889 -1.068751  
H 4.345632 0.872427 -1.611918  
H 4.911353 0.944595 0.085112  
O -3.813406 -0.250969 -0.191477  
C -4.233061 -1.626859 -0.256223  
H -5.295060 -1.626066 -0.012998  
H -4.085047 -2.025925 -1.266929  
H -3.685131 -2.230675 0.473155

Full Reference for Gaussian 03, Revision C.02

Frisch, M. J.; Trucks, G. W.; Schlegel, H. B.; Scuseria, G. E.; Robb, M. A.; Cheeseman, J. R.; Montgomery, Jr., J. A.; Vreven, T.; Kudin, K. N.; Burant, J. C.; Millam, J. M.; Iyengar, S. S.; Tomasi, J.; Barone, V.; Mennucci, B.; Cossi, M.; Scalmani, G.; Rega, N.; Petersson, G. A.; Nakatsuji, H.; Hada, M.; Ehara, M.; Toyota, K.; Fukuda, R.; Hasegawa, J.; Ishida, M.; Nakajima, T.; Honda, Y.; Kitao, O.; Nakai, H.; Klene, M.; Li, X.; Knox, J. E.; Hratchian, H. P.; Cross, J. B.; Bakken, V.; Adamo, C.; Jaramillo, J.; Gomperts, R.; Stratmann, R. E.; Yazyev, O.; Austin, A. J.; Cammi, R.; Pomelli, C.; Ochterski, J. W.; Ayala, P. Y.; Morokuma, K.; Voth, G. A.; Salvador, P.; Dannenberg, J. J.; Zakrzewski, V. G.; Dapprich, S.; Daniels, A. D.; Strain, M. C.; Farkas, O.; Malick, D. K.; Rabuck, A. D.; Raghavachari, K.; Foresman, J. B.; Ortiz, J. V.; Cui, Q.; Baboul, A. G.; Clifford, S.; Cioslowski, J.; Stefanov, B. B.; Liu, G.; Liashenko, A.; Piskorz, P.; Komaromi, I.; Martin, R. L.; Fox, D. J.; Keith, T.; Al-Laham, M. A.; Peng, C. Y.; Nanayakkara, A.; Challacombe, M.; Gill, P. M. W.; Johnson, B.; Chen, W.; Wong, M. W.; Gonzalez, C.; and Pople, J. A.; Gaussian, Inc., Wallingford CT, 2004.



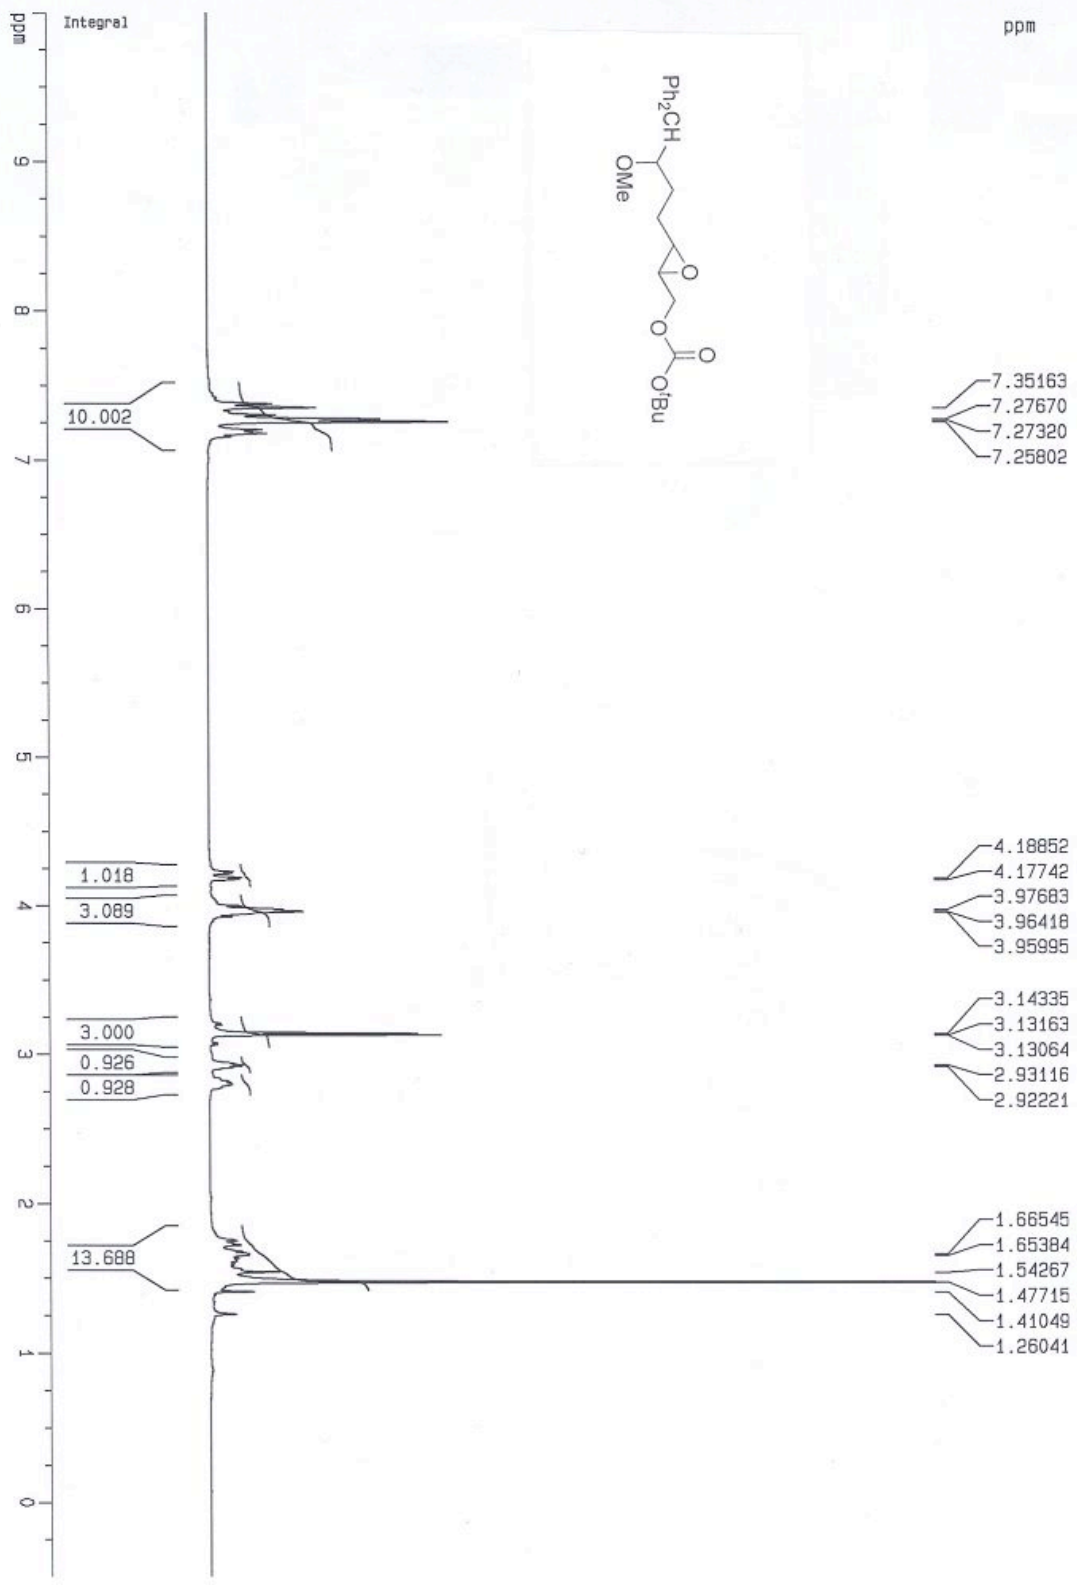

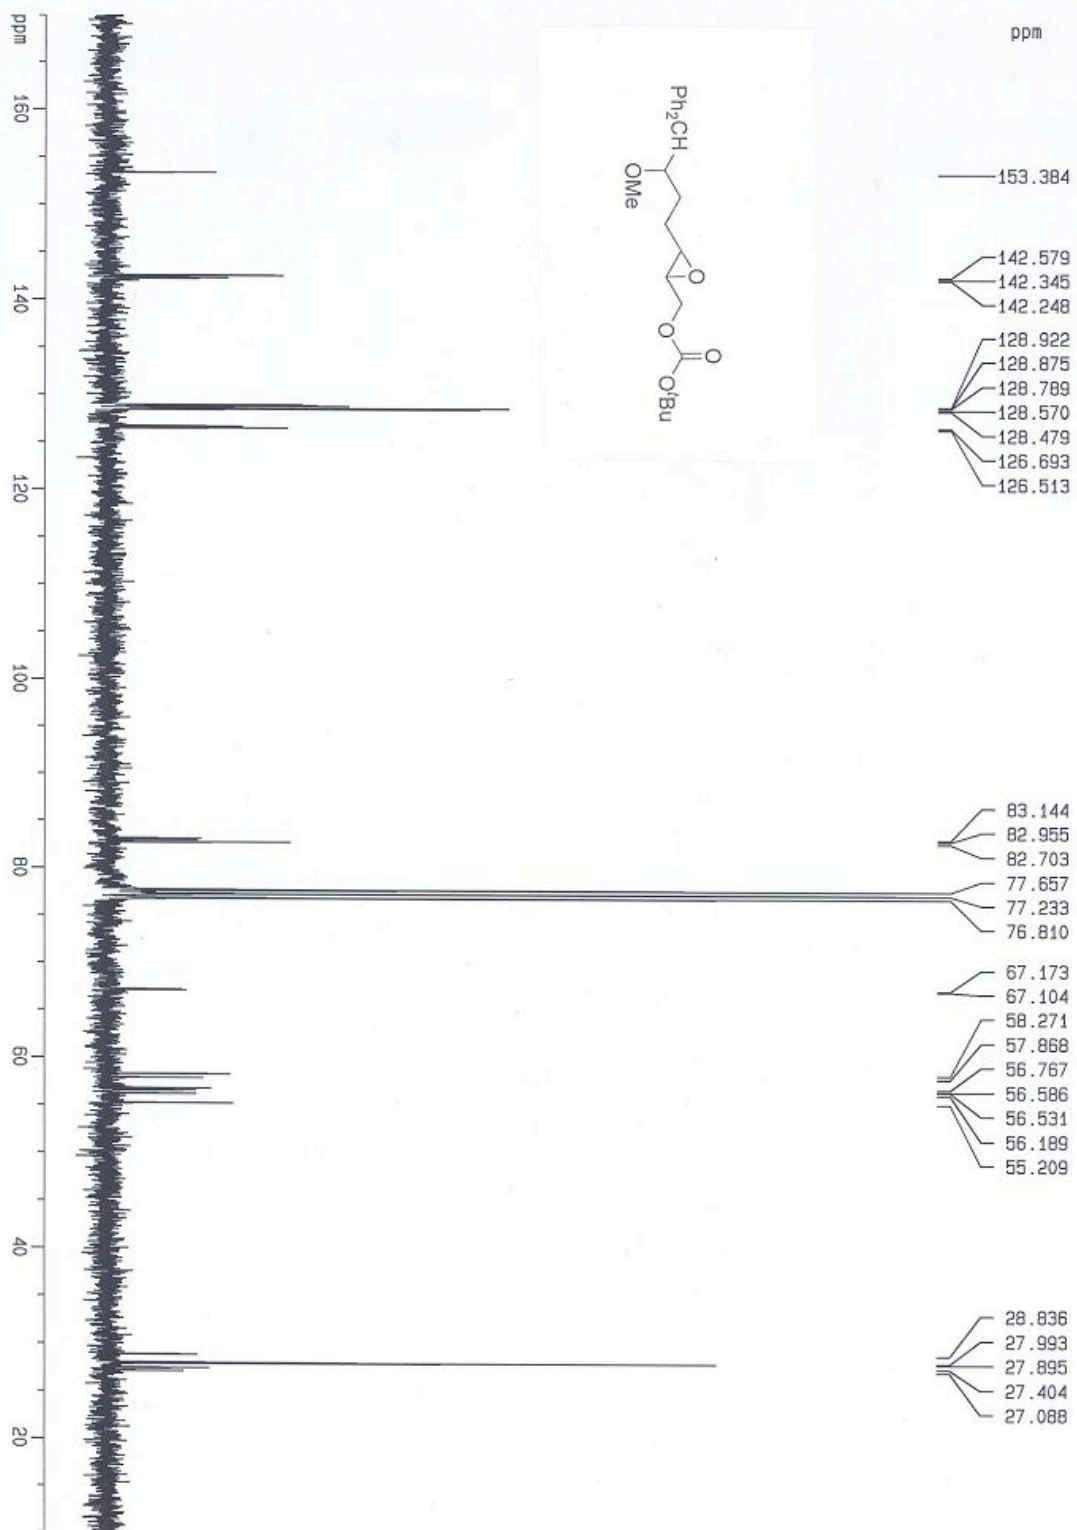

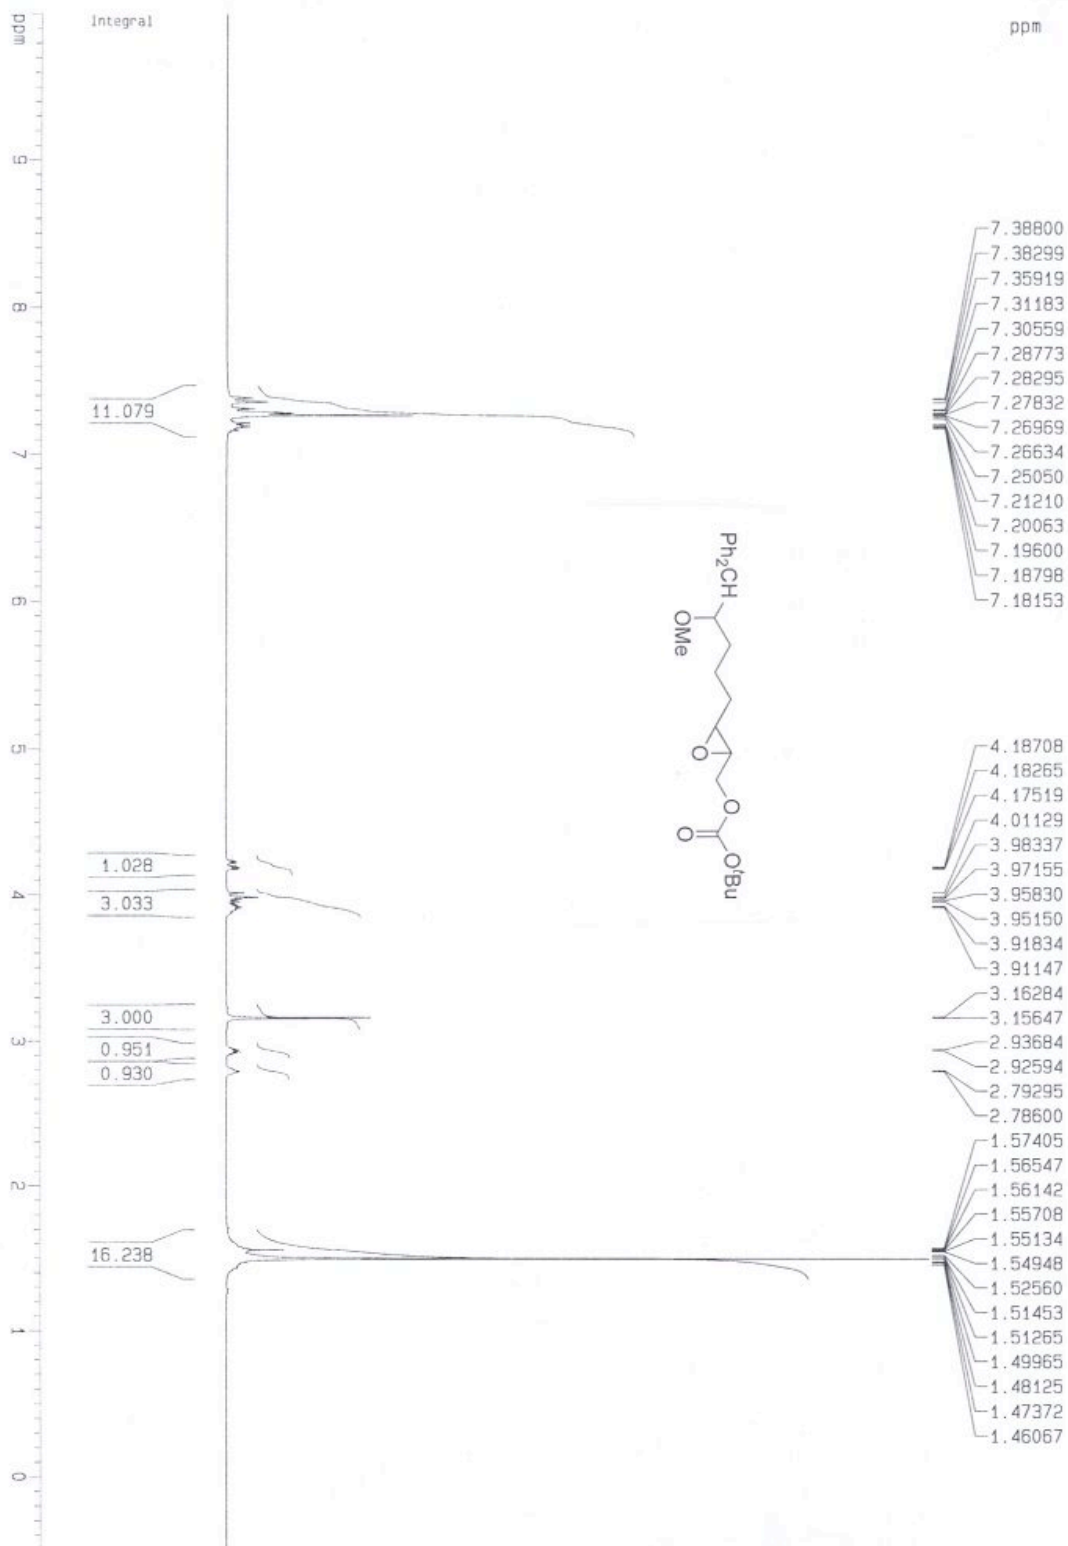

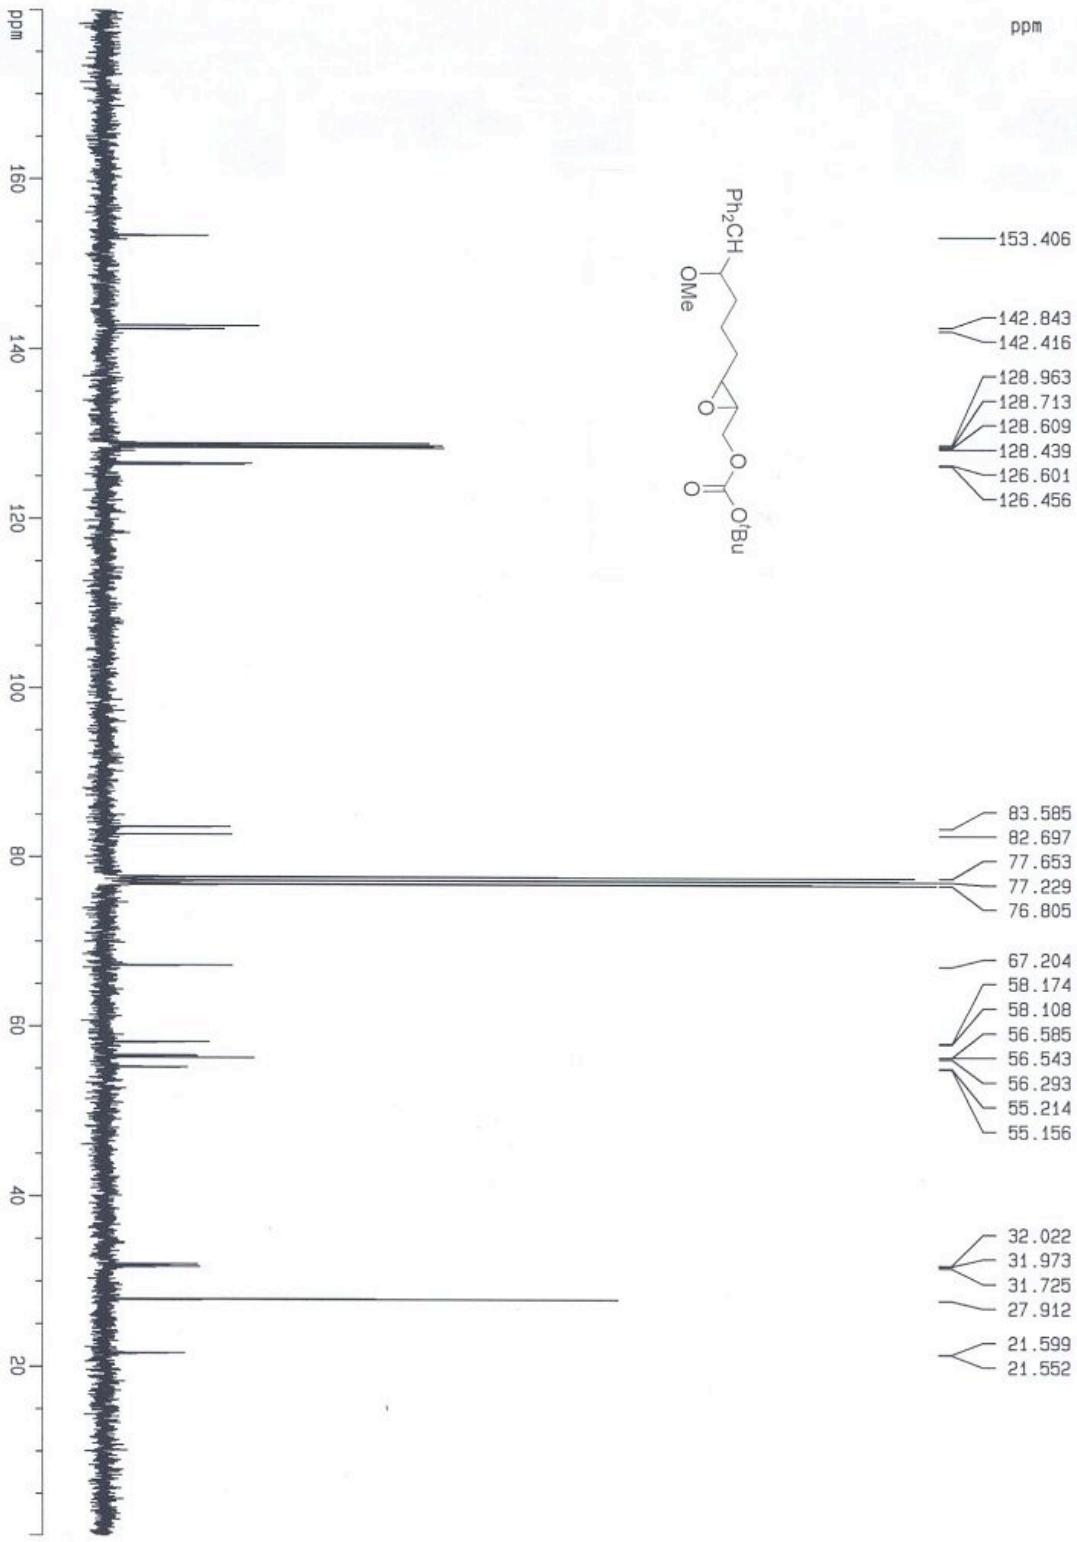

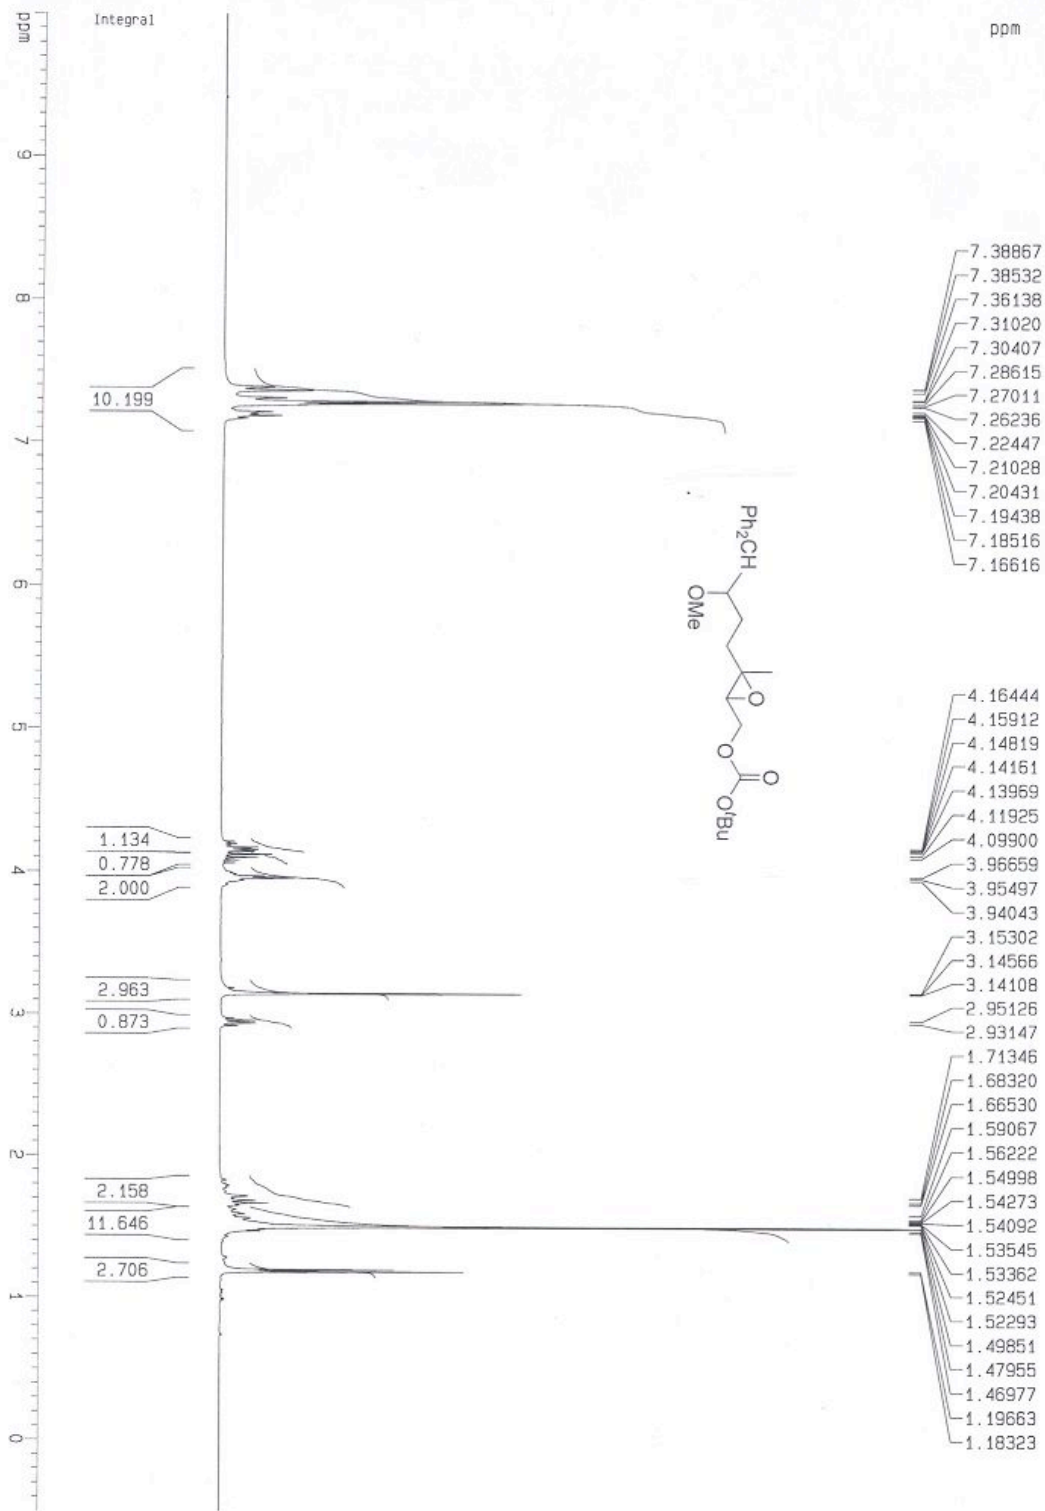

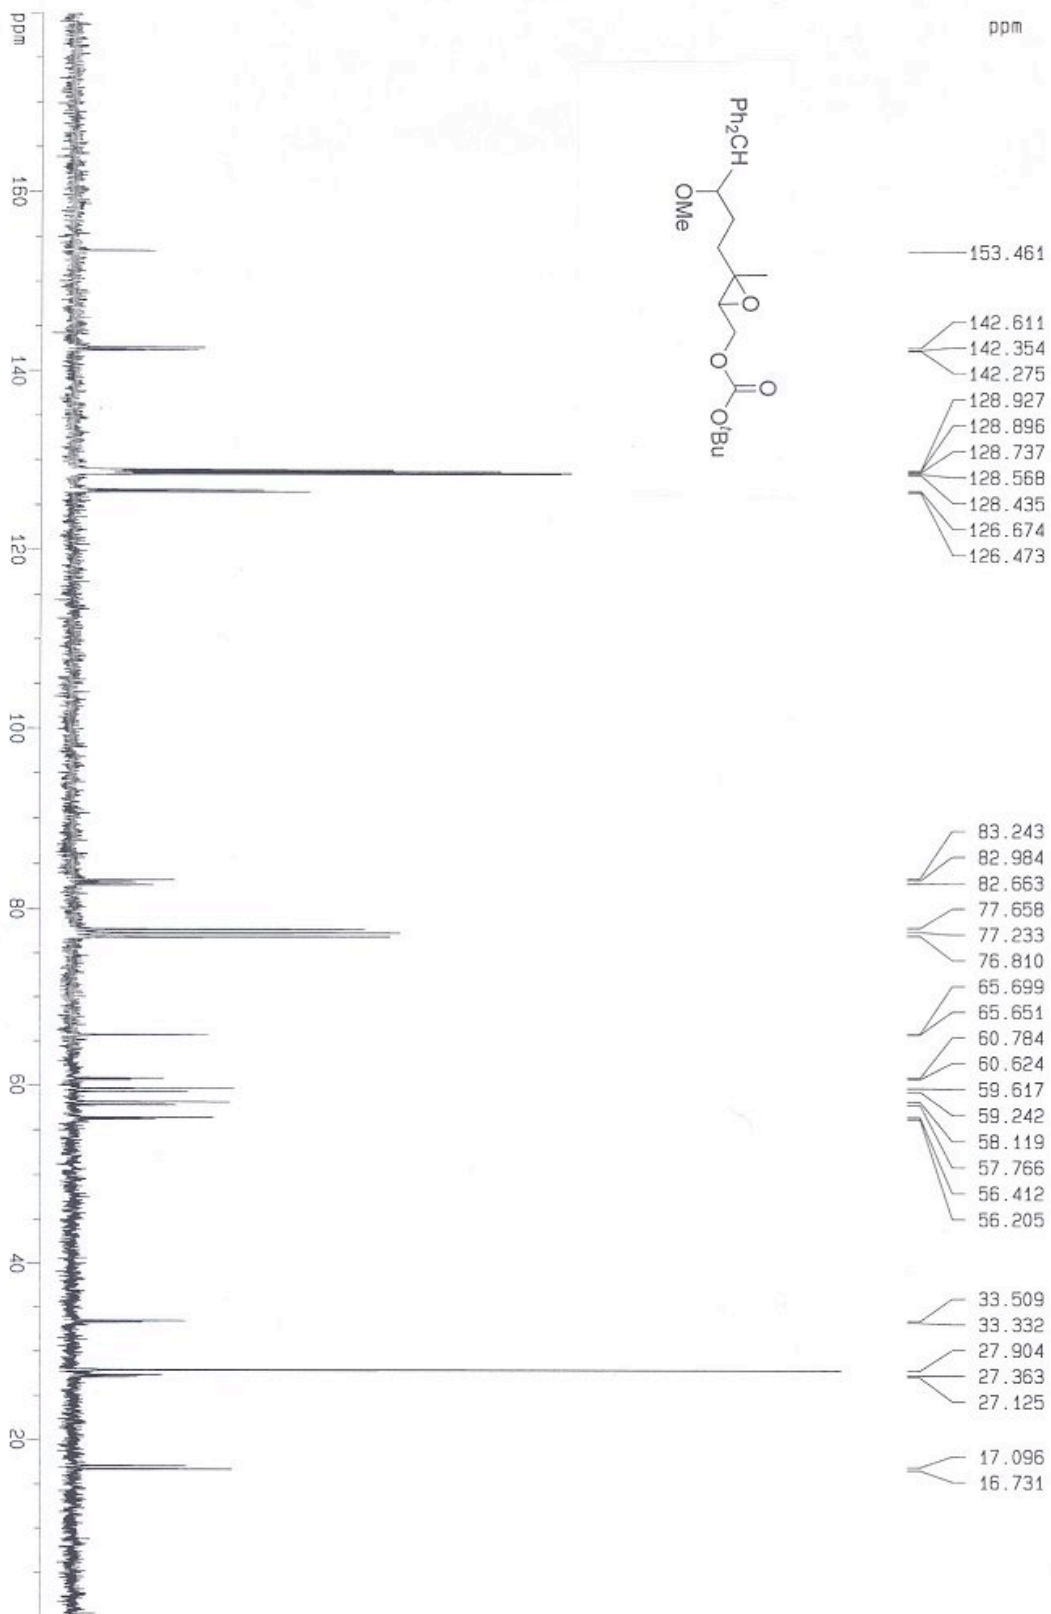

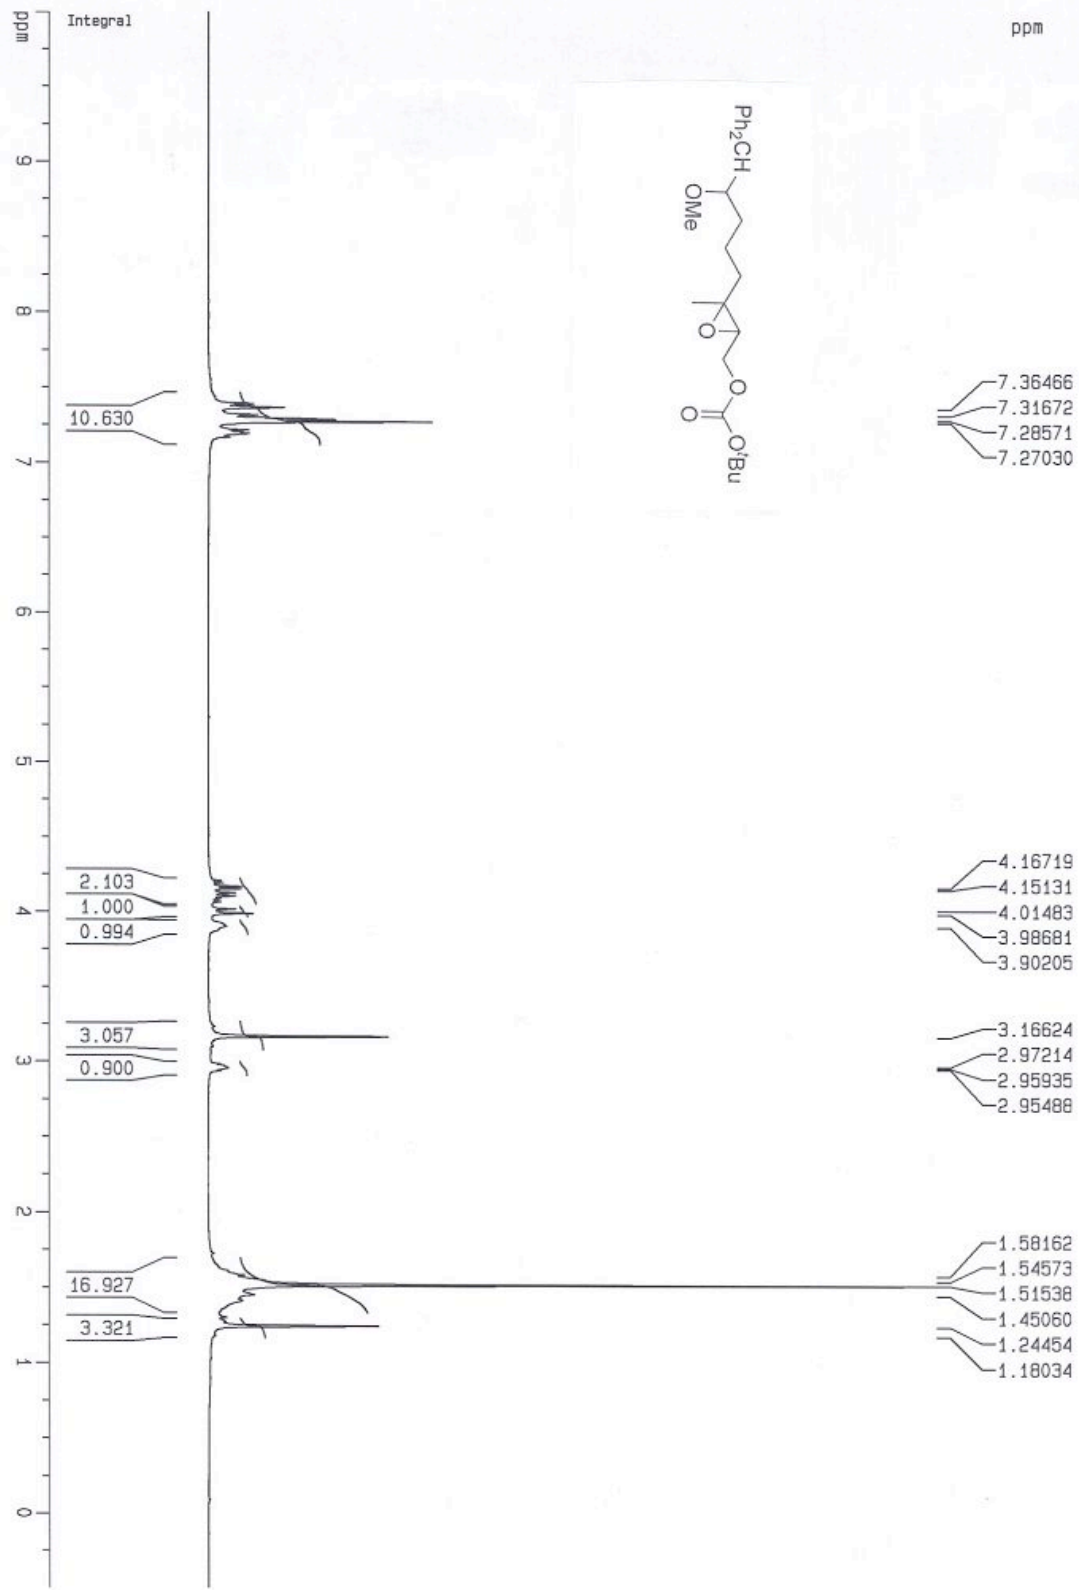

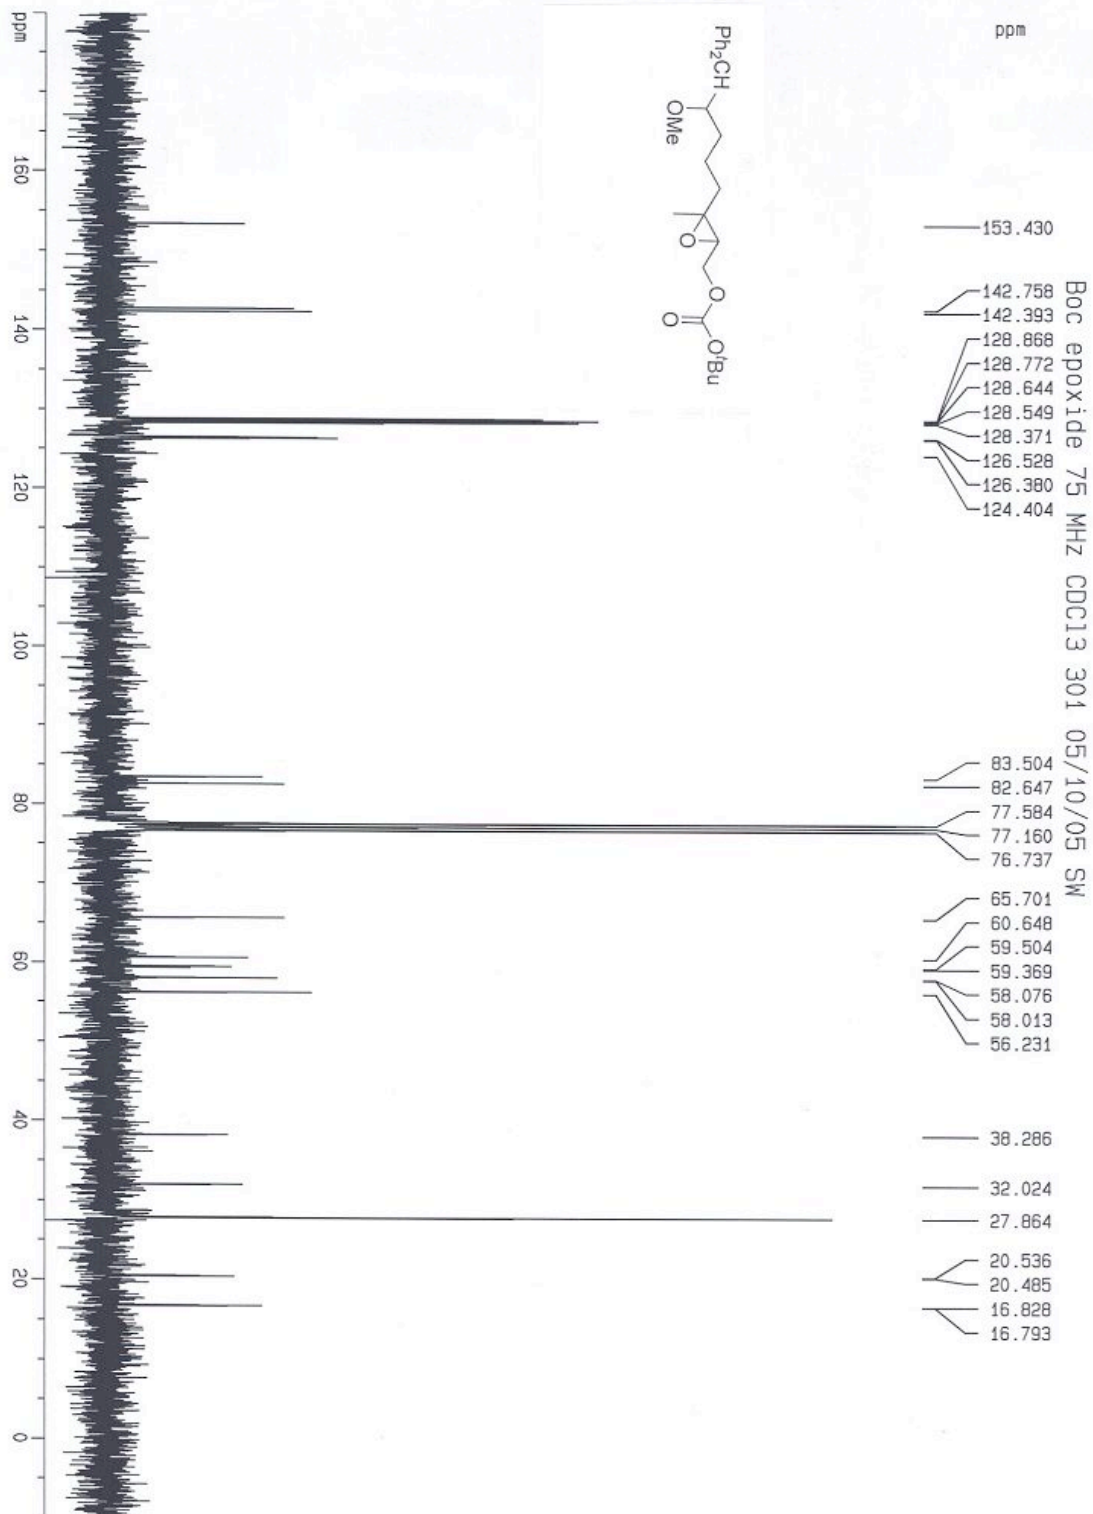



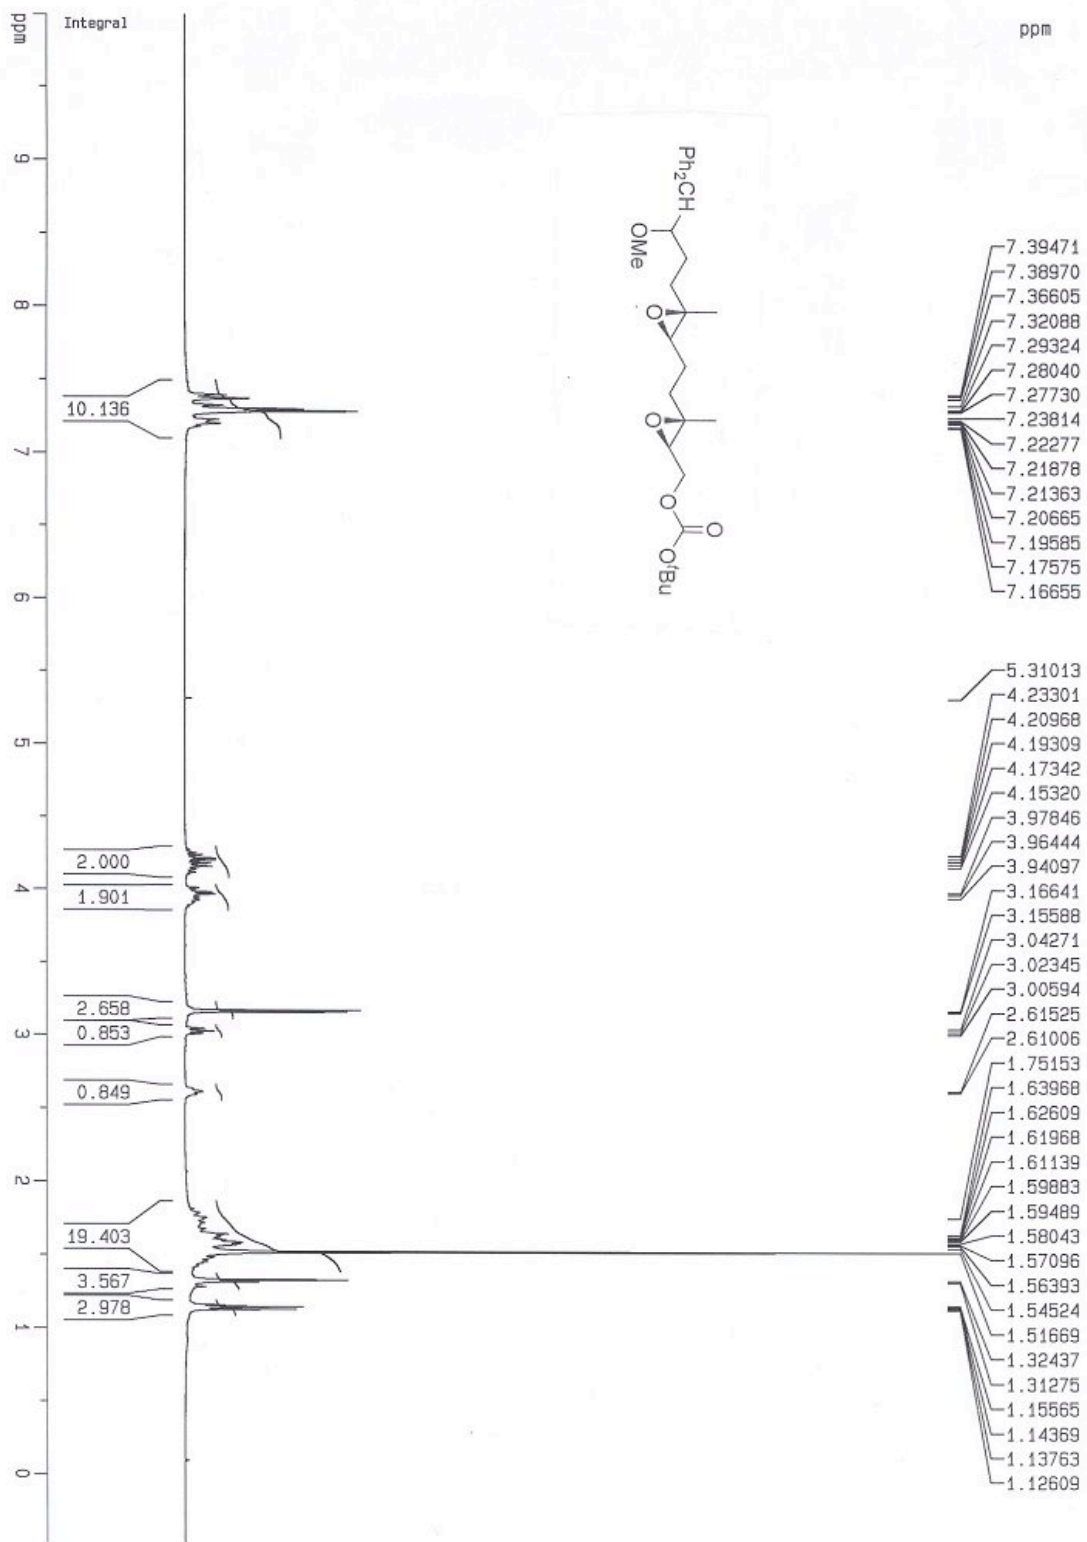

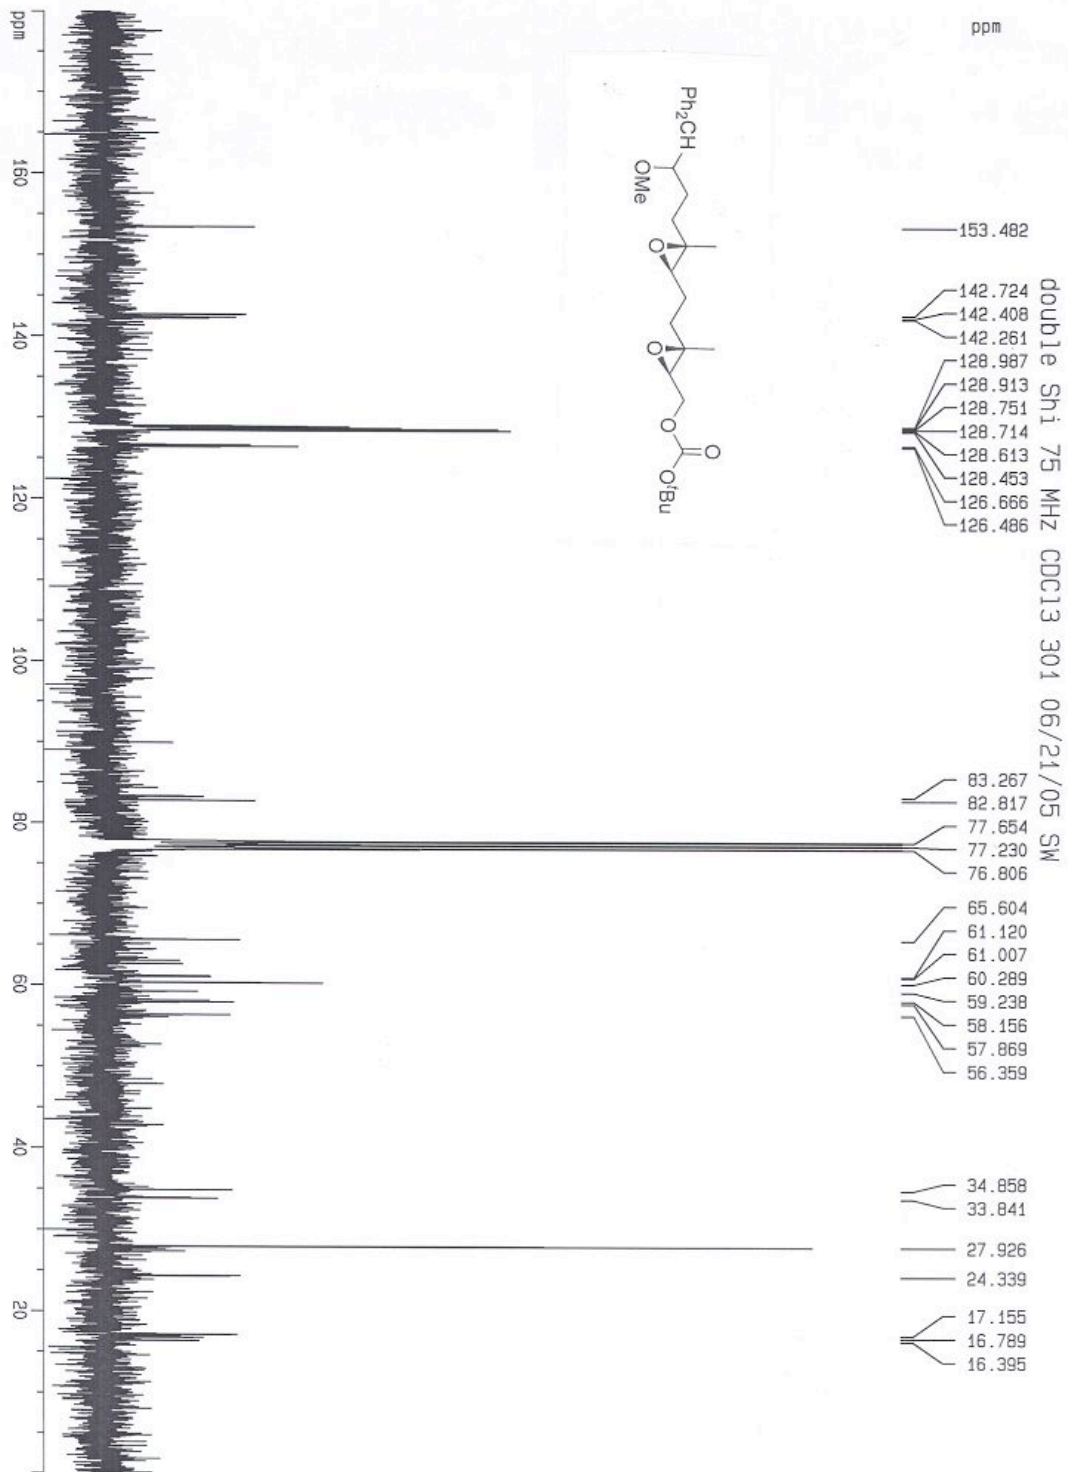

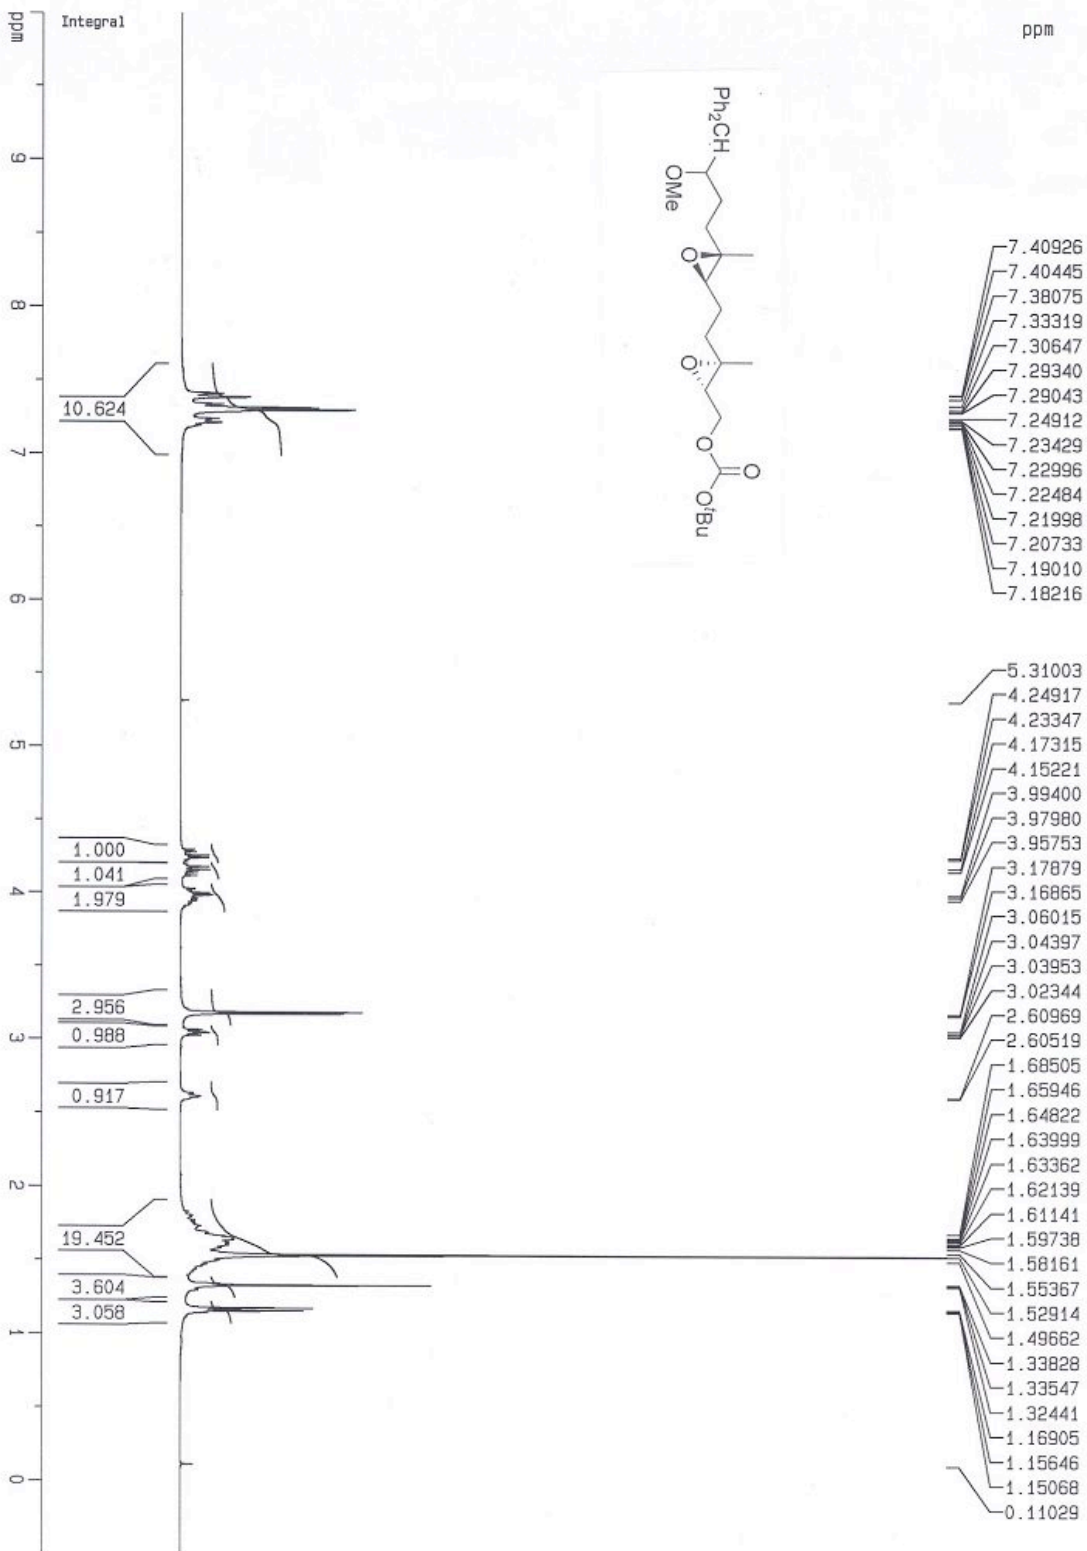

ppm

160

140

120

100

80

60

40

20

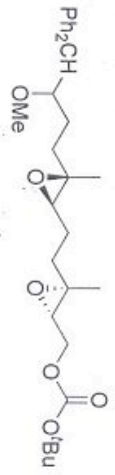

ppm

- 153.470
- 142.700
- 142.386
- 142.246
- 128.968
- 128.692
- 128.597
- 128.418
- 126.626
- 126.454
- 83.279
- 82.713
- 77.653
- 77.229
- 76.806
- 65.632
- 63.100
- 62.716
- 60.890
- 60.323
- 59.752
- 59.200
- 58.123
- 57.830
- 56.335
- 56.070
- 35.203
- 33.926
- 33.834
- 27.903
- 27.604
- 27.345
- 24.469
- 16.893
- 16.417

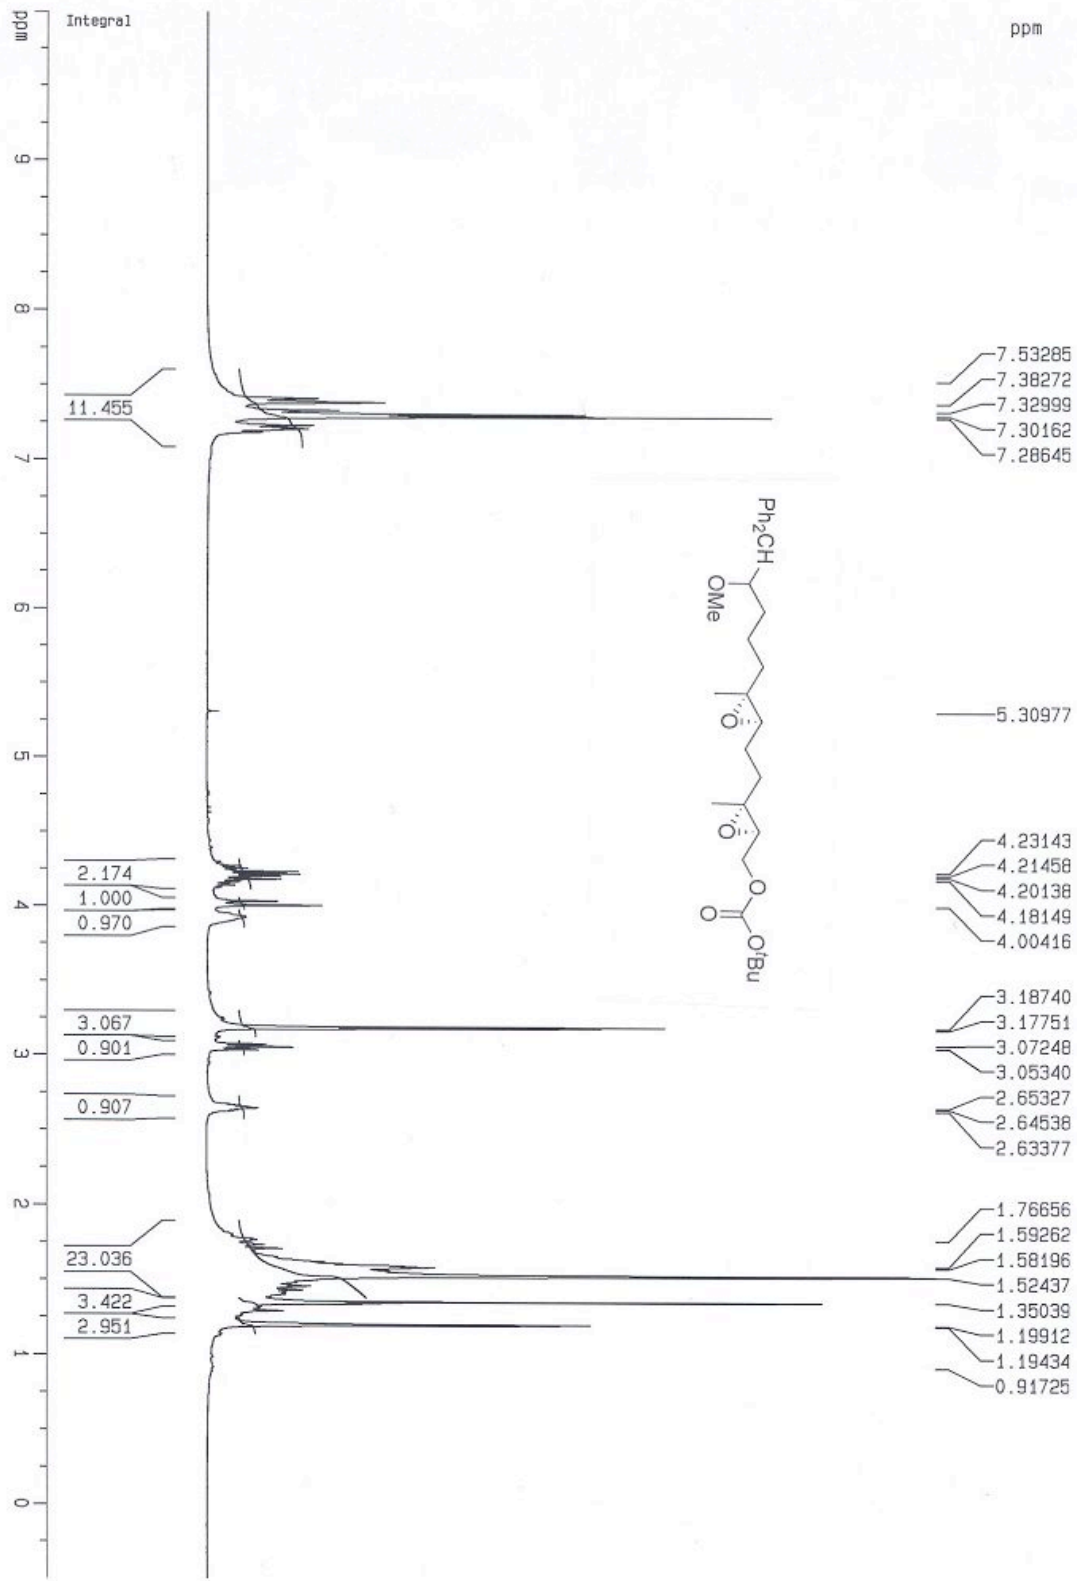

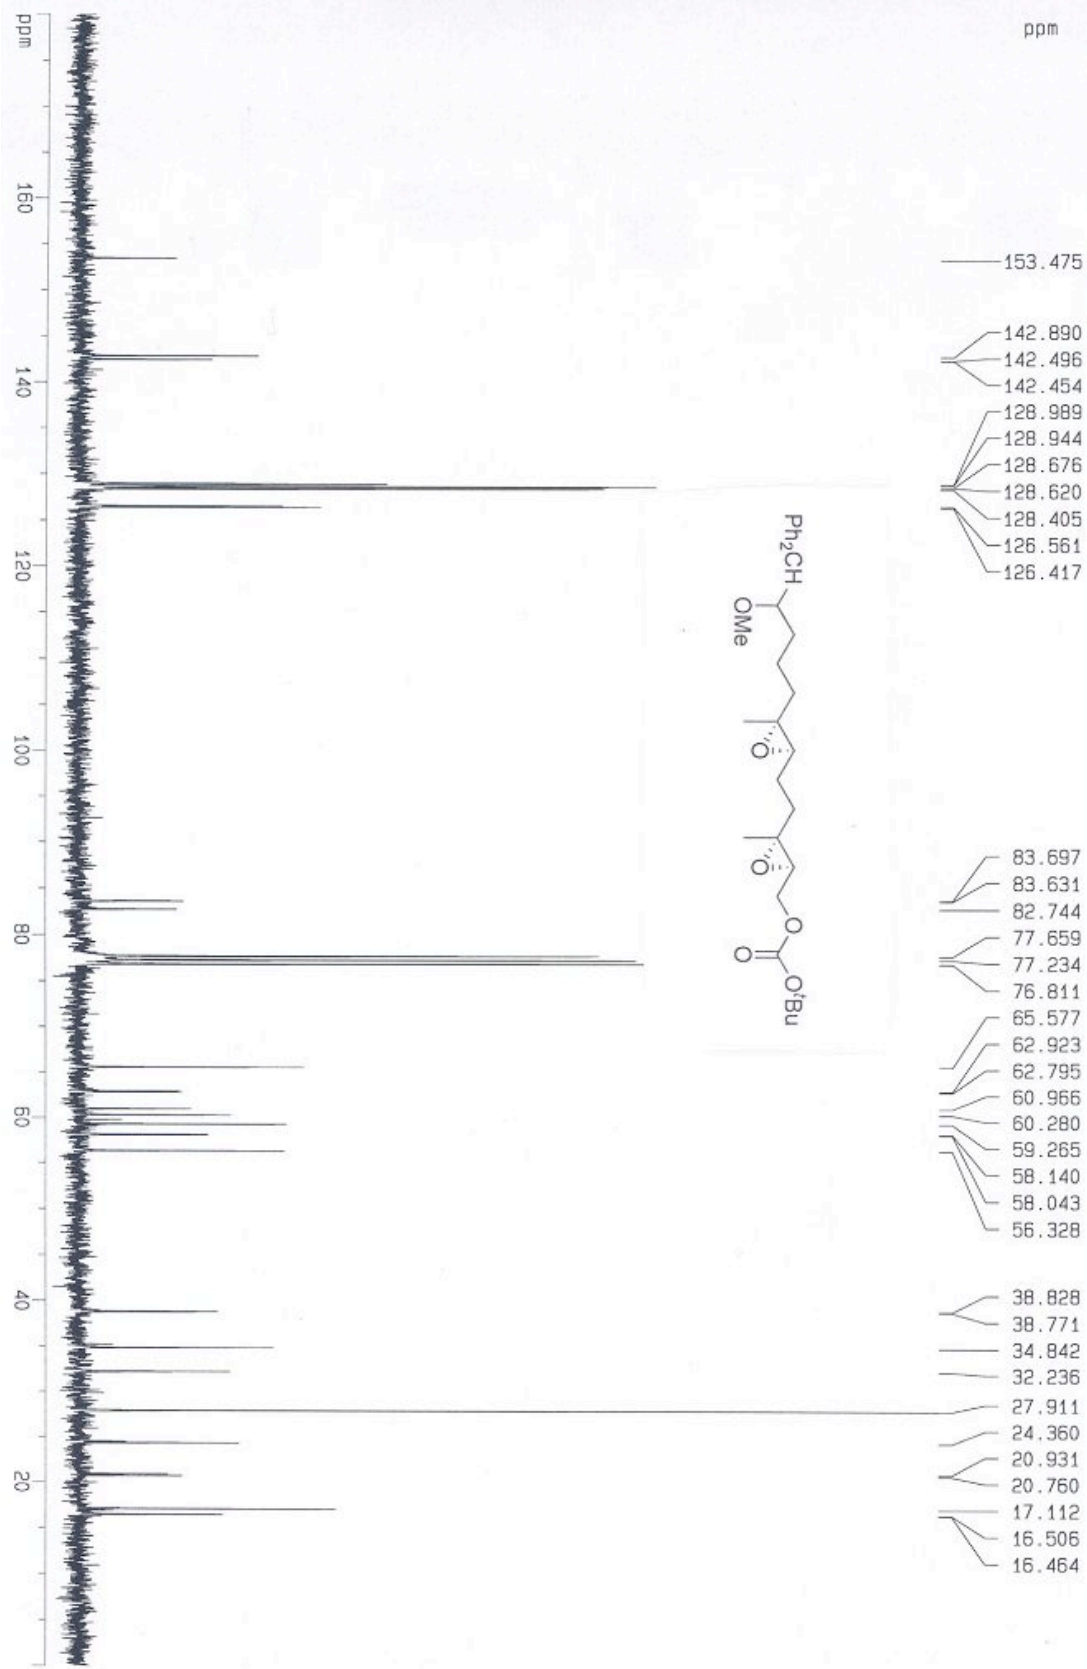

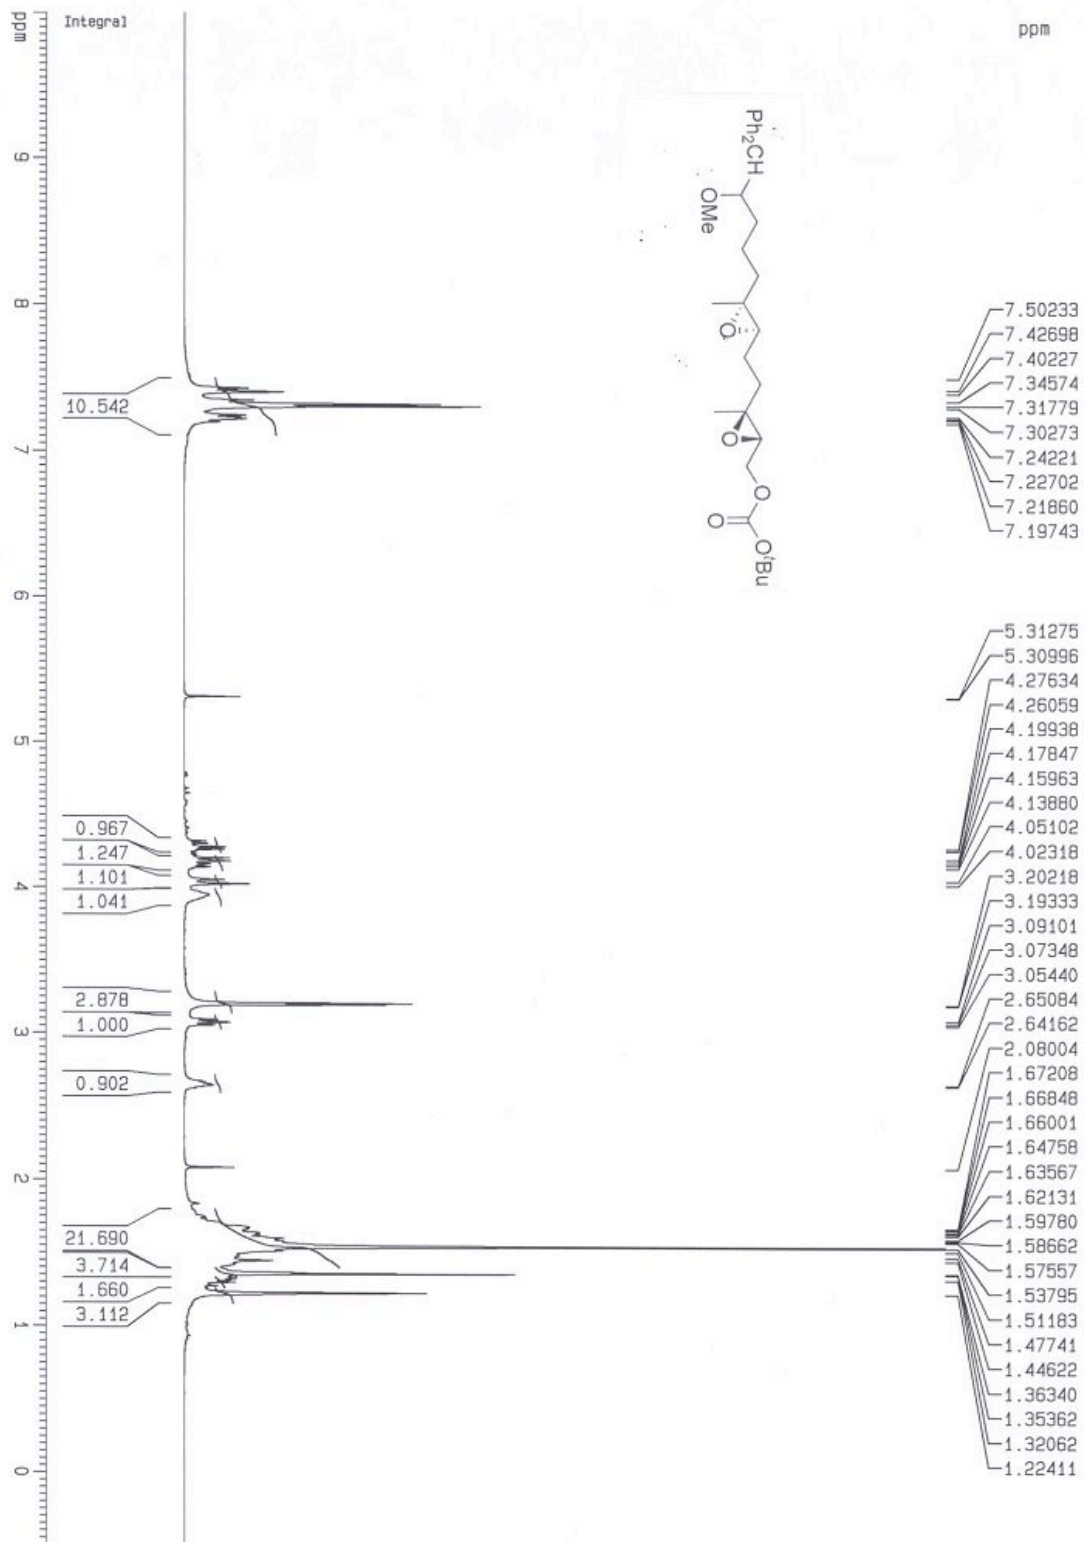



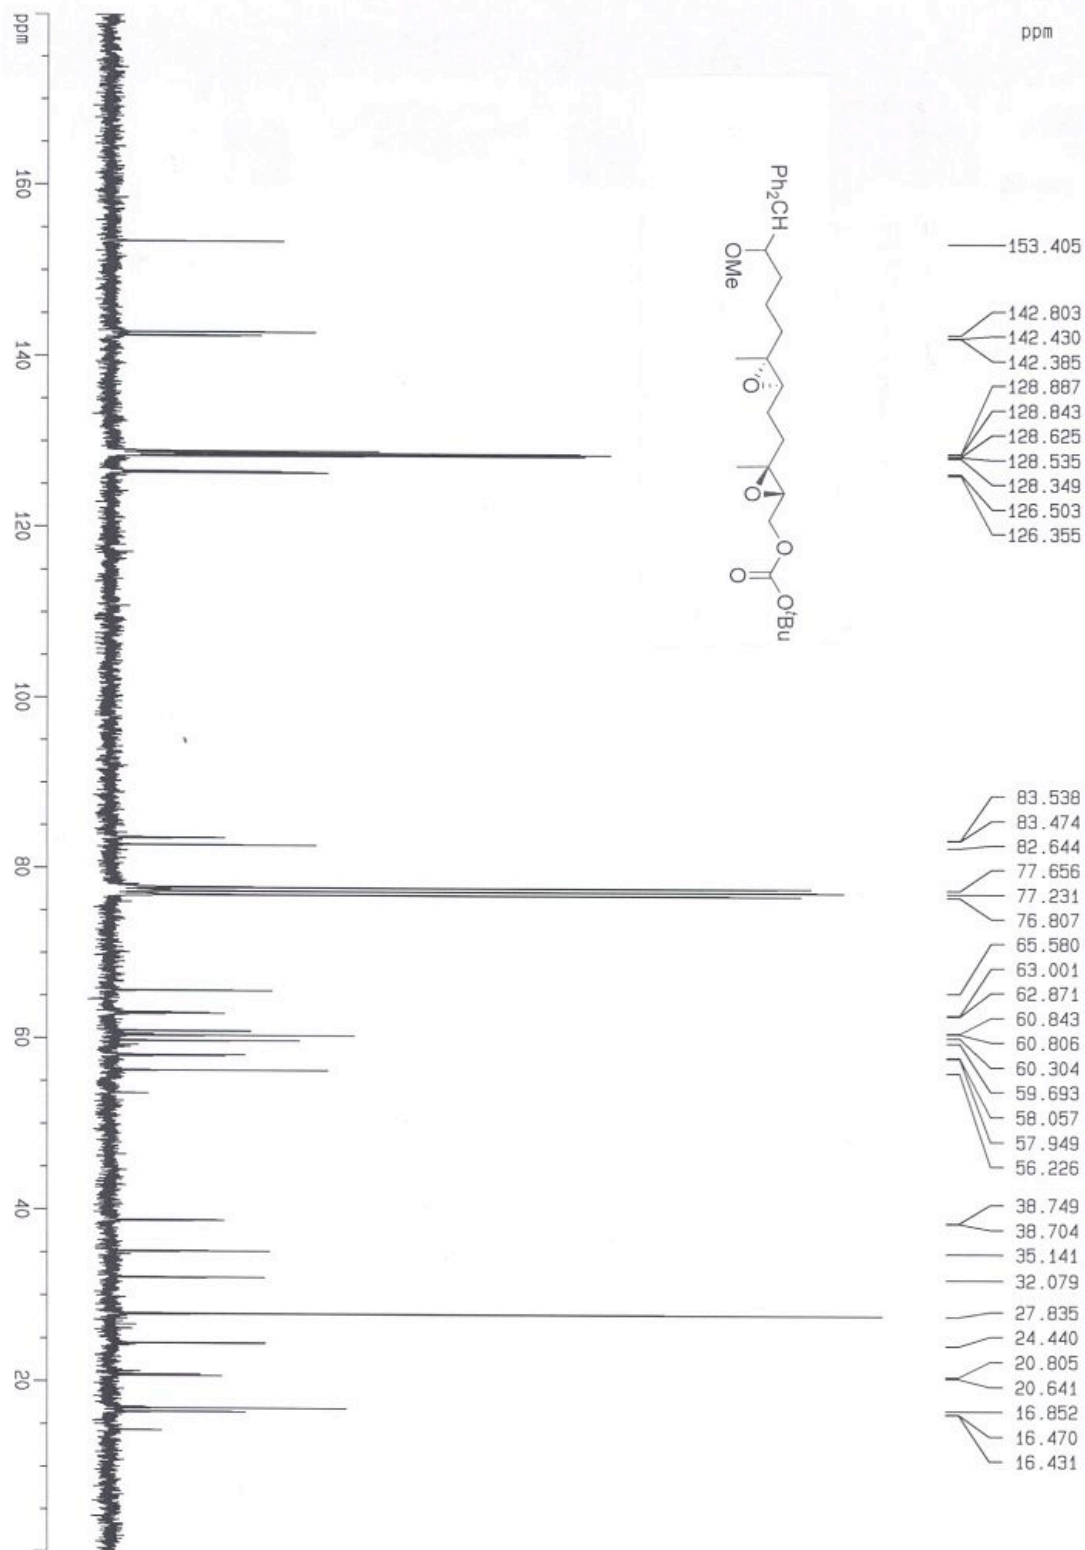



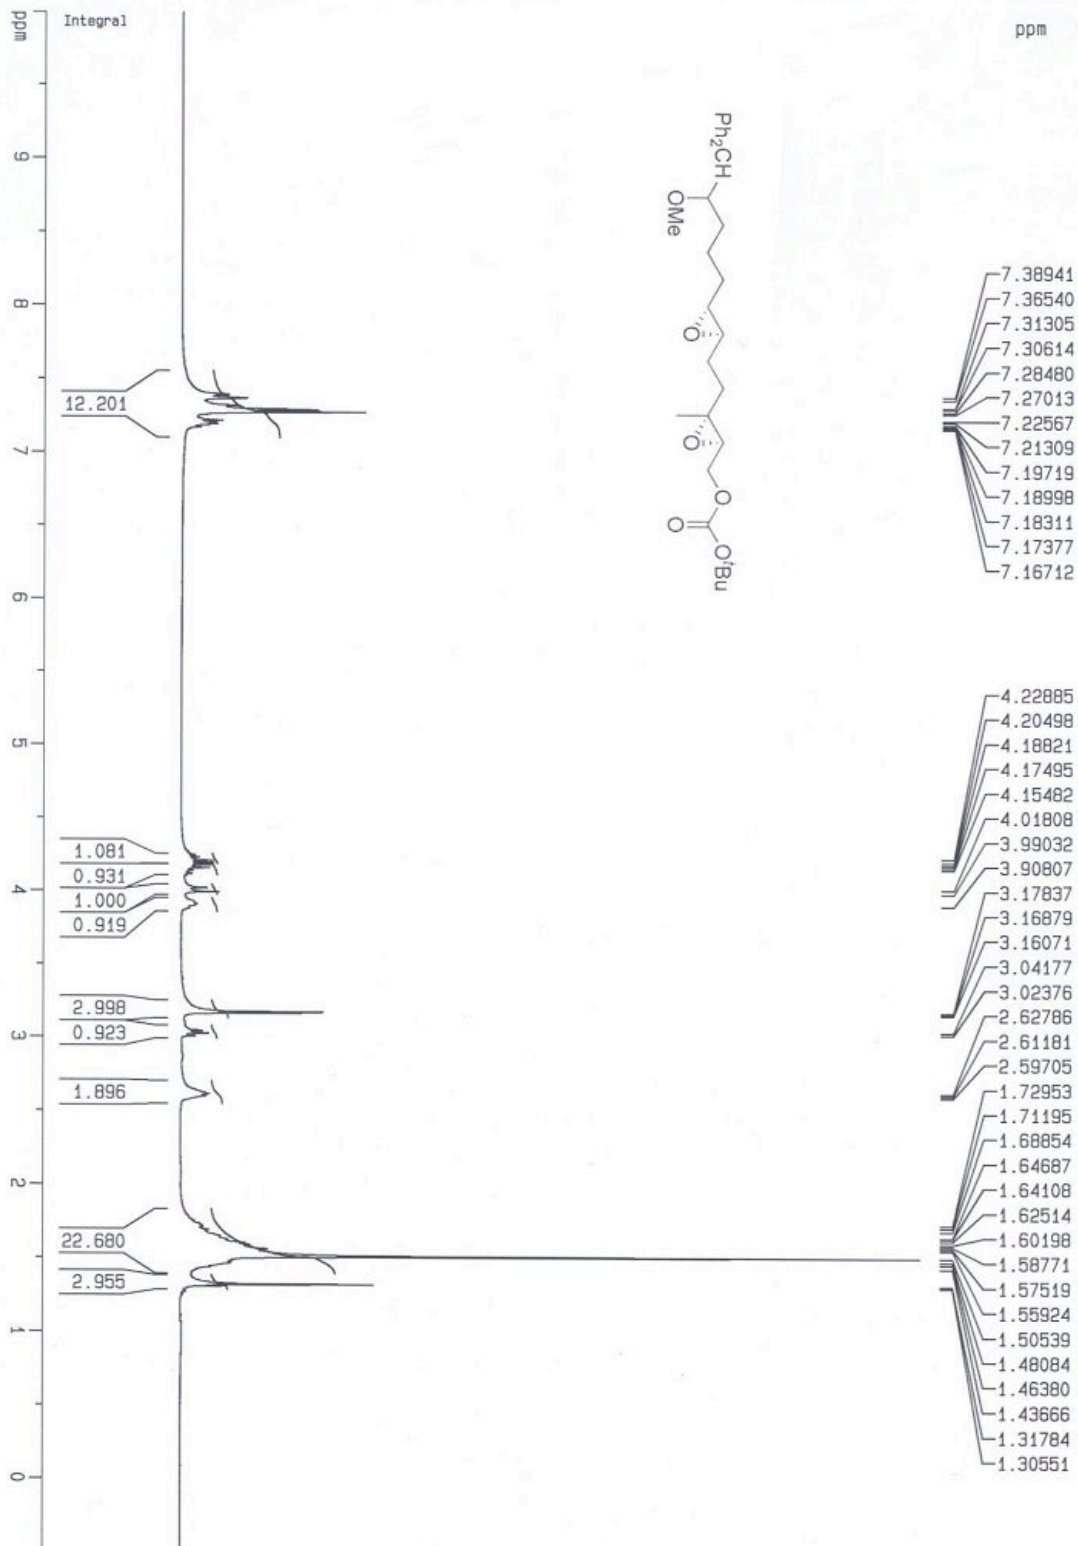

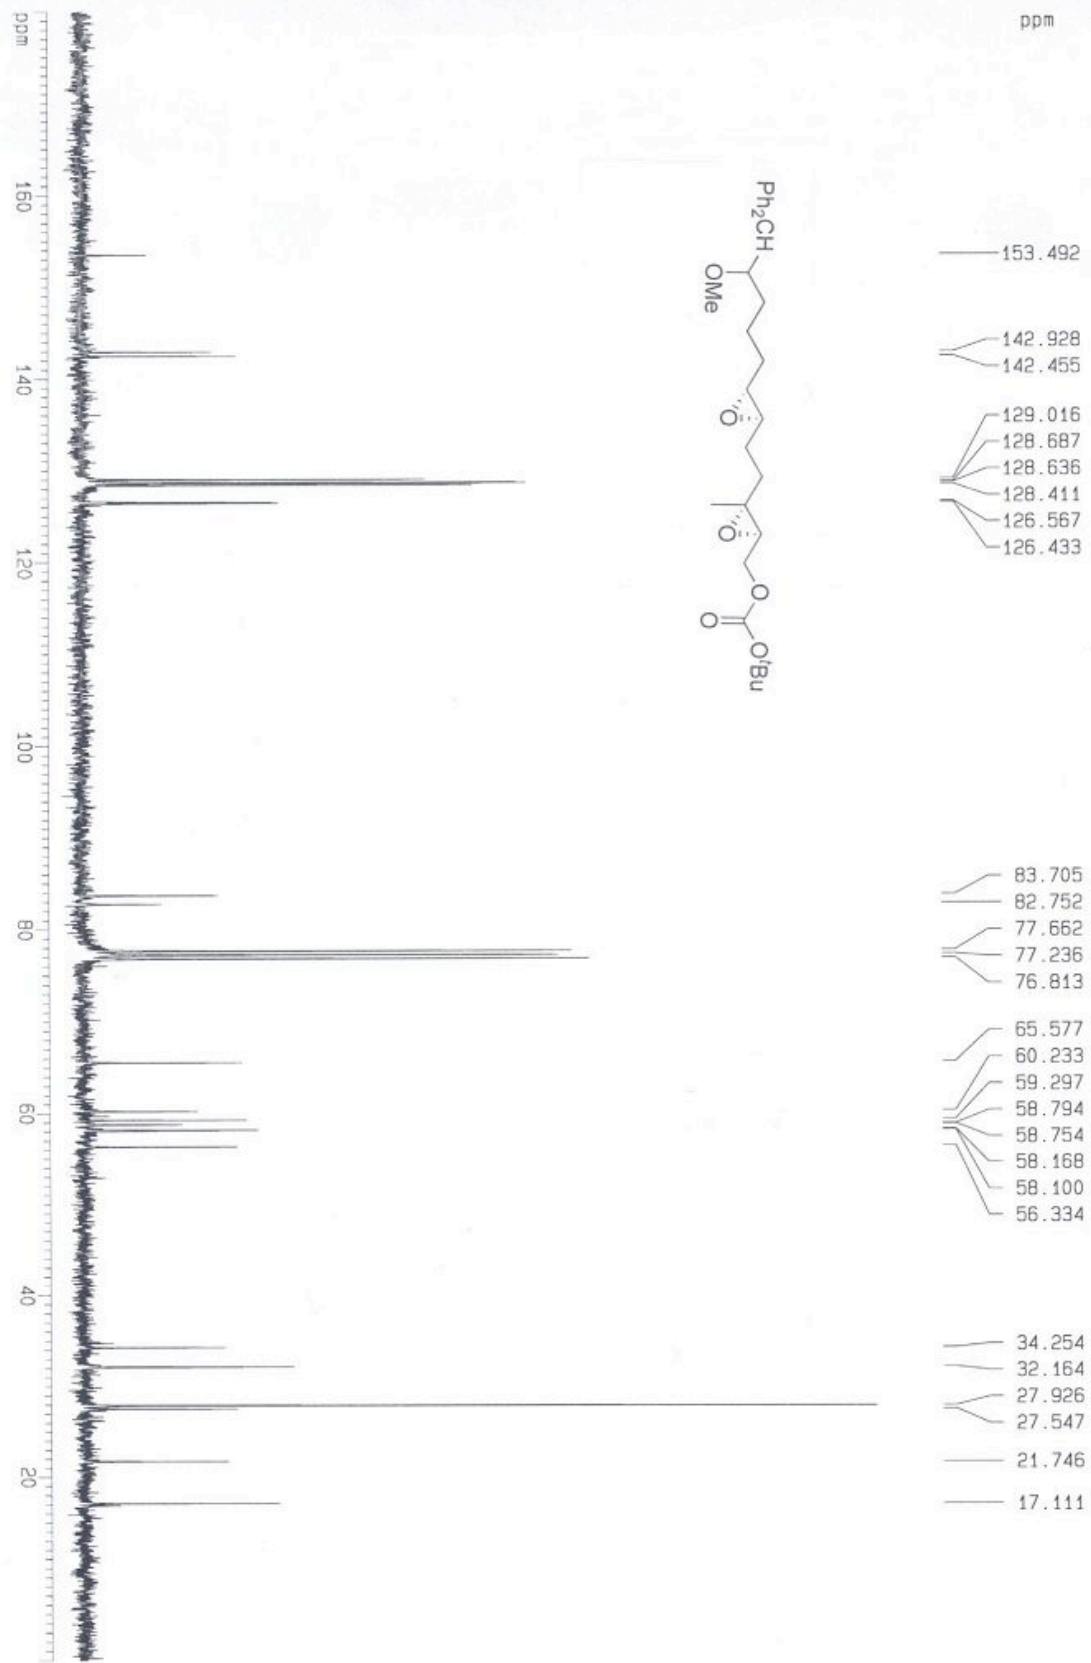

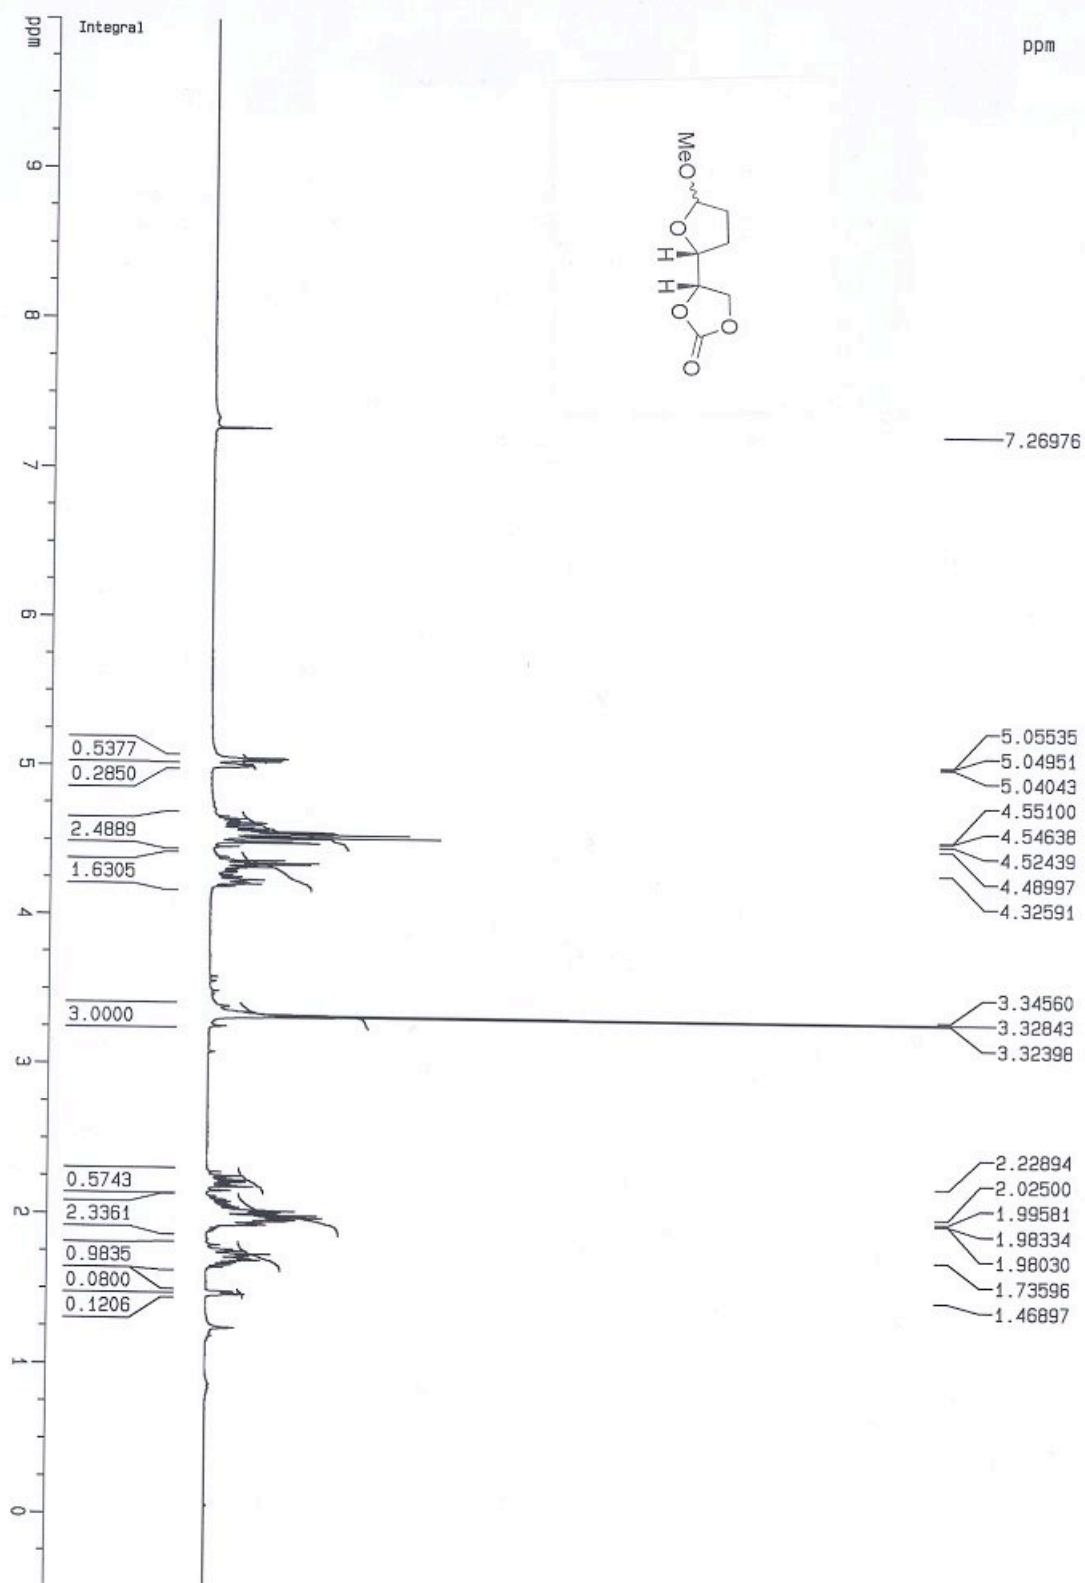

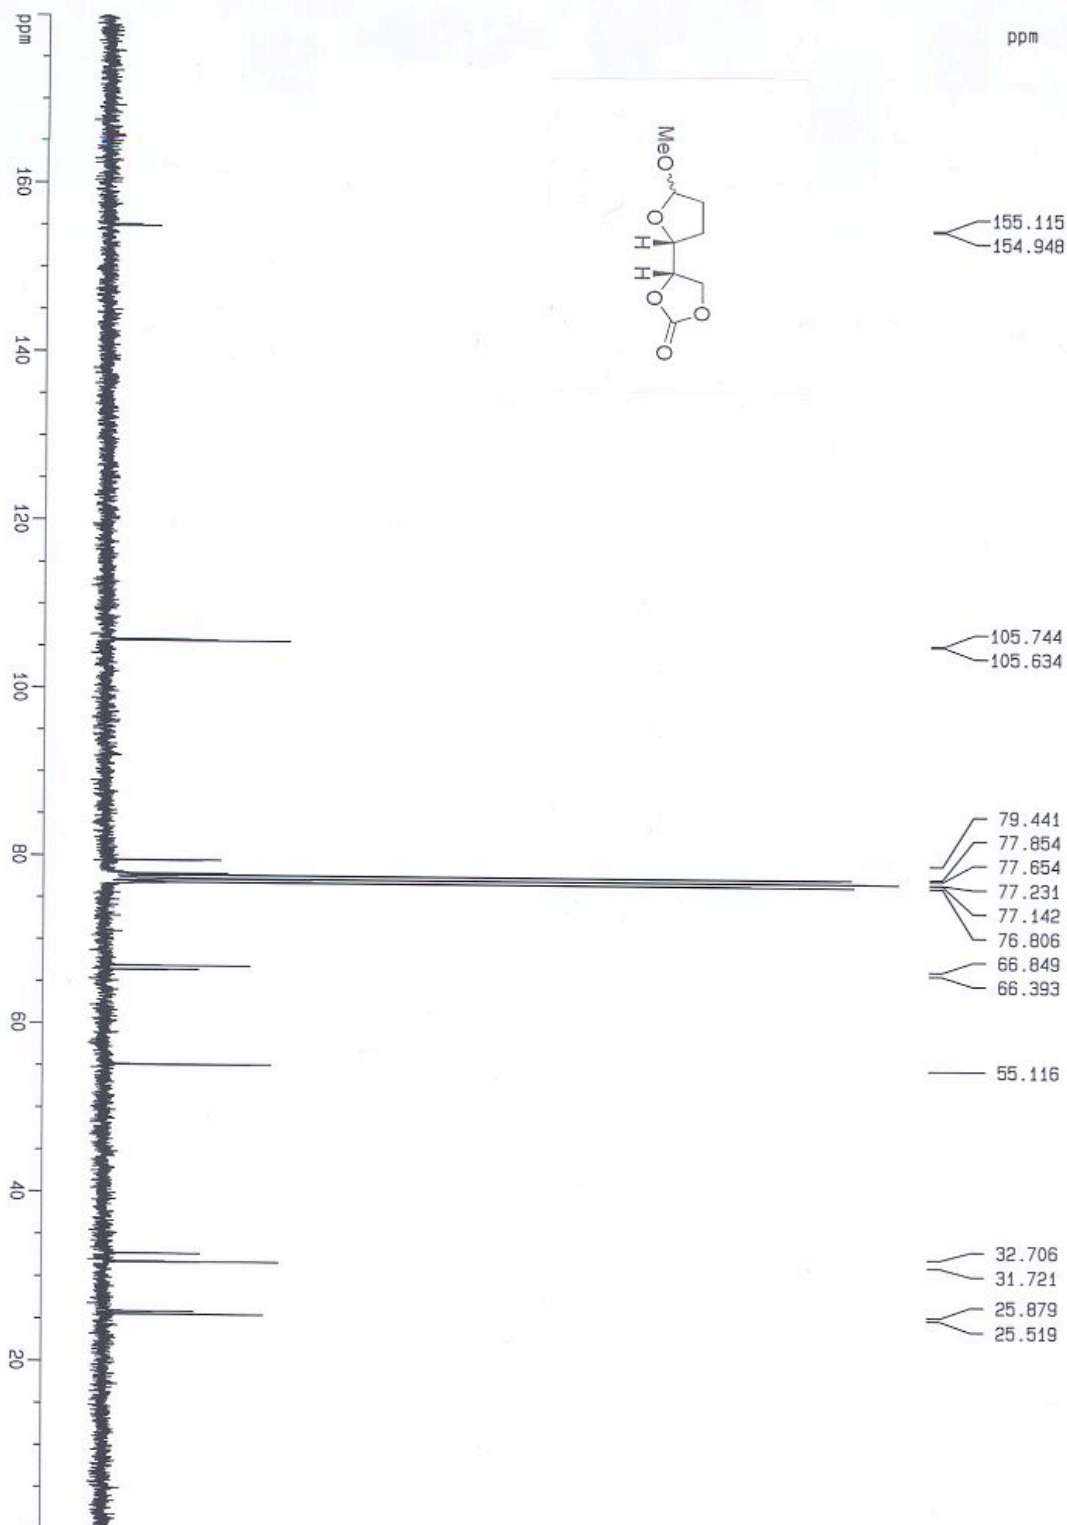

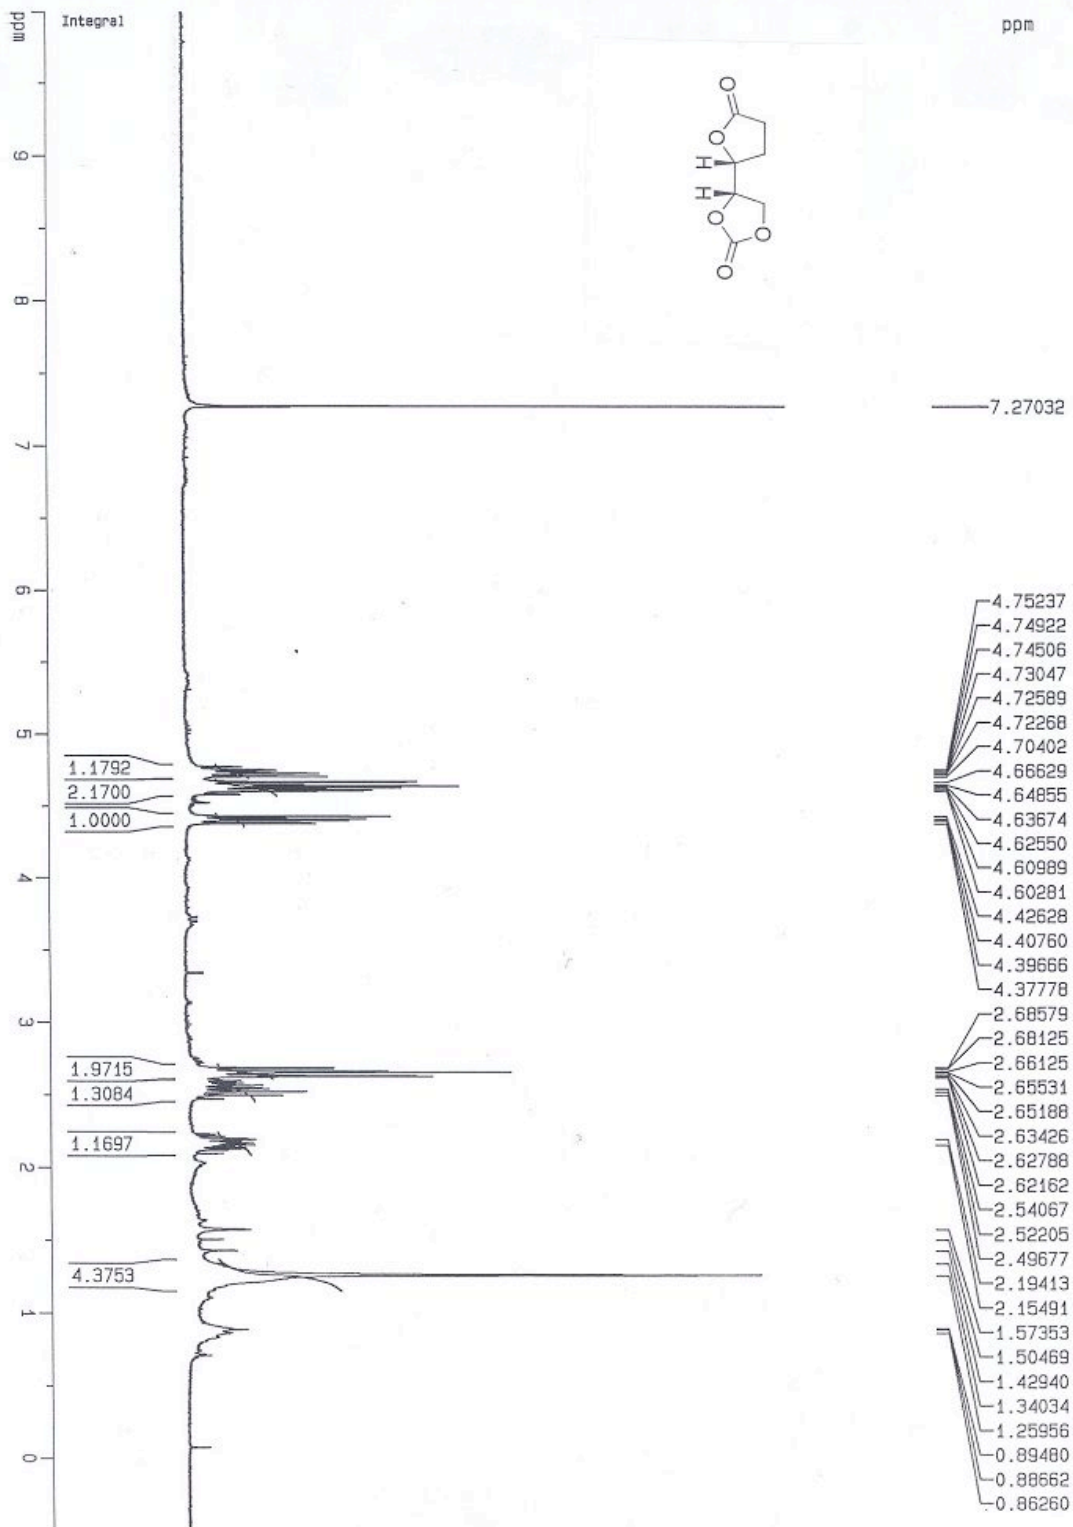

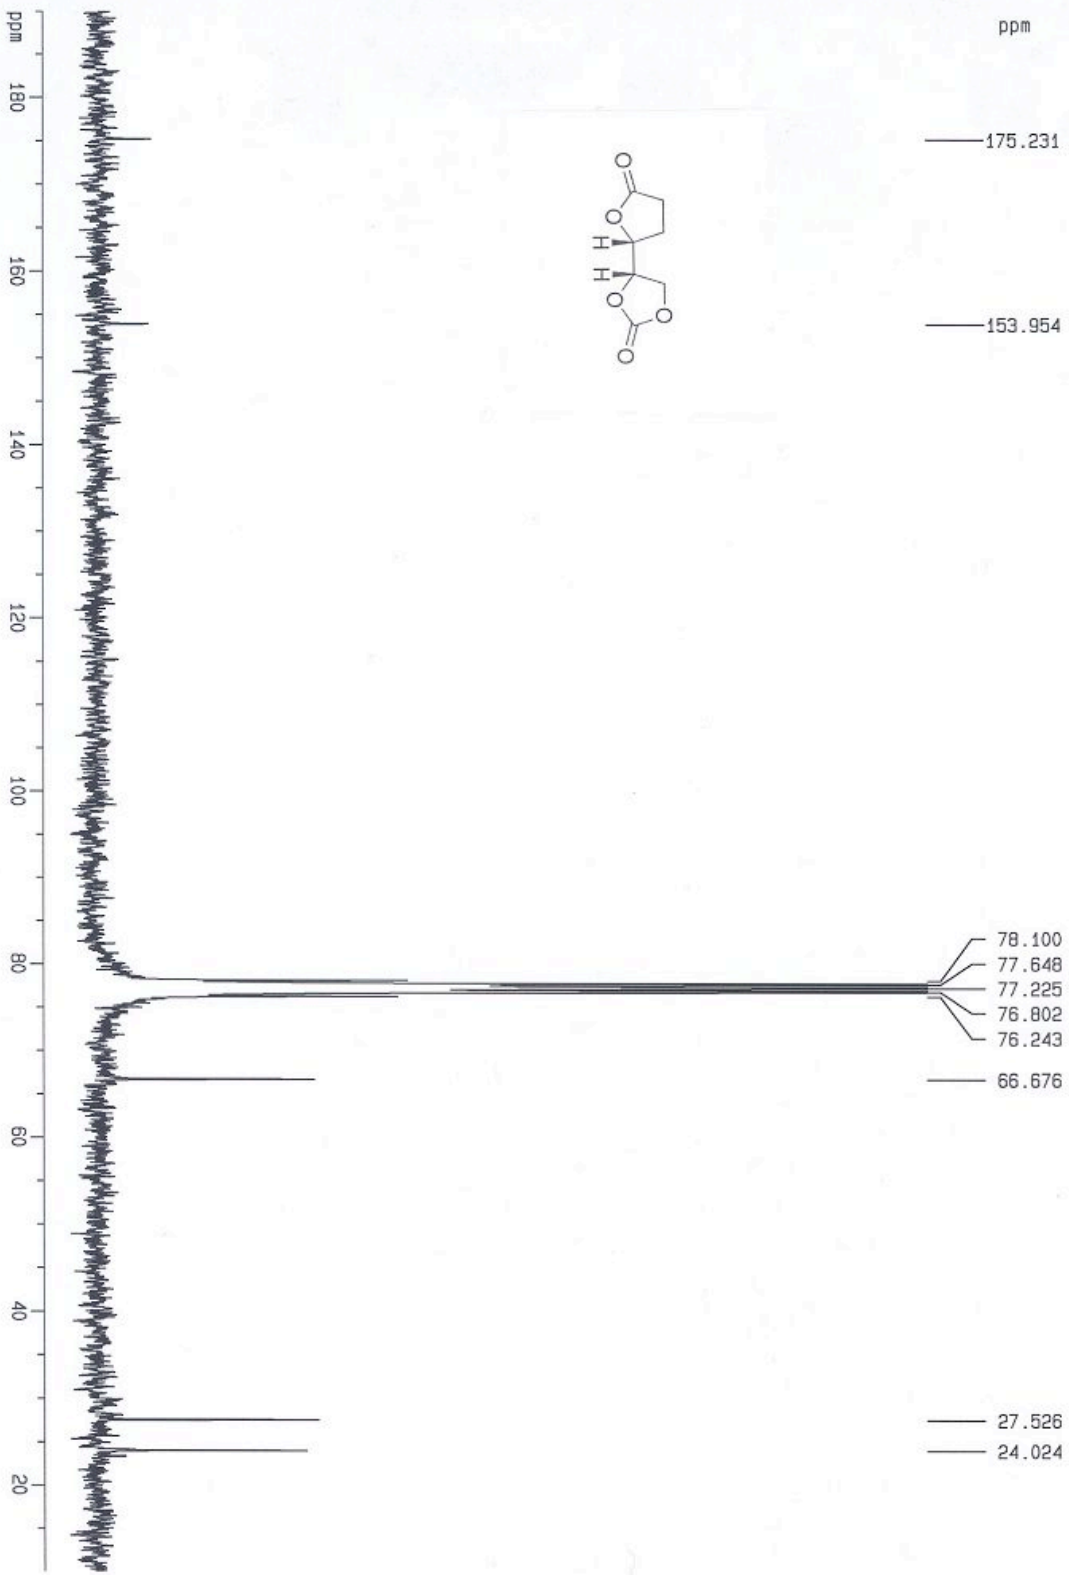

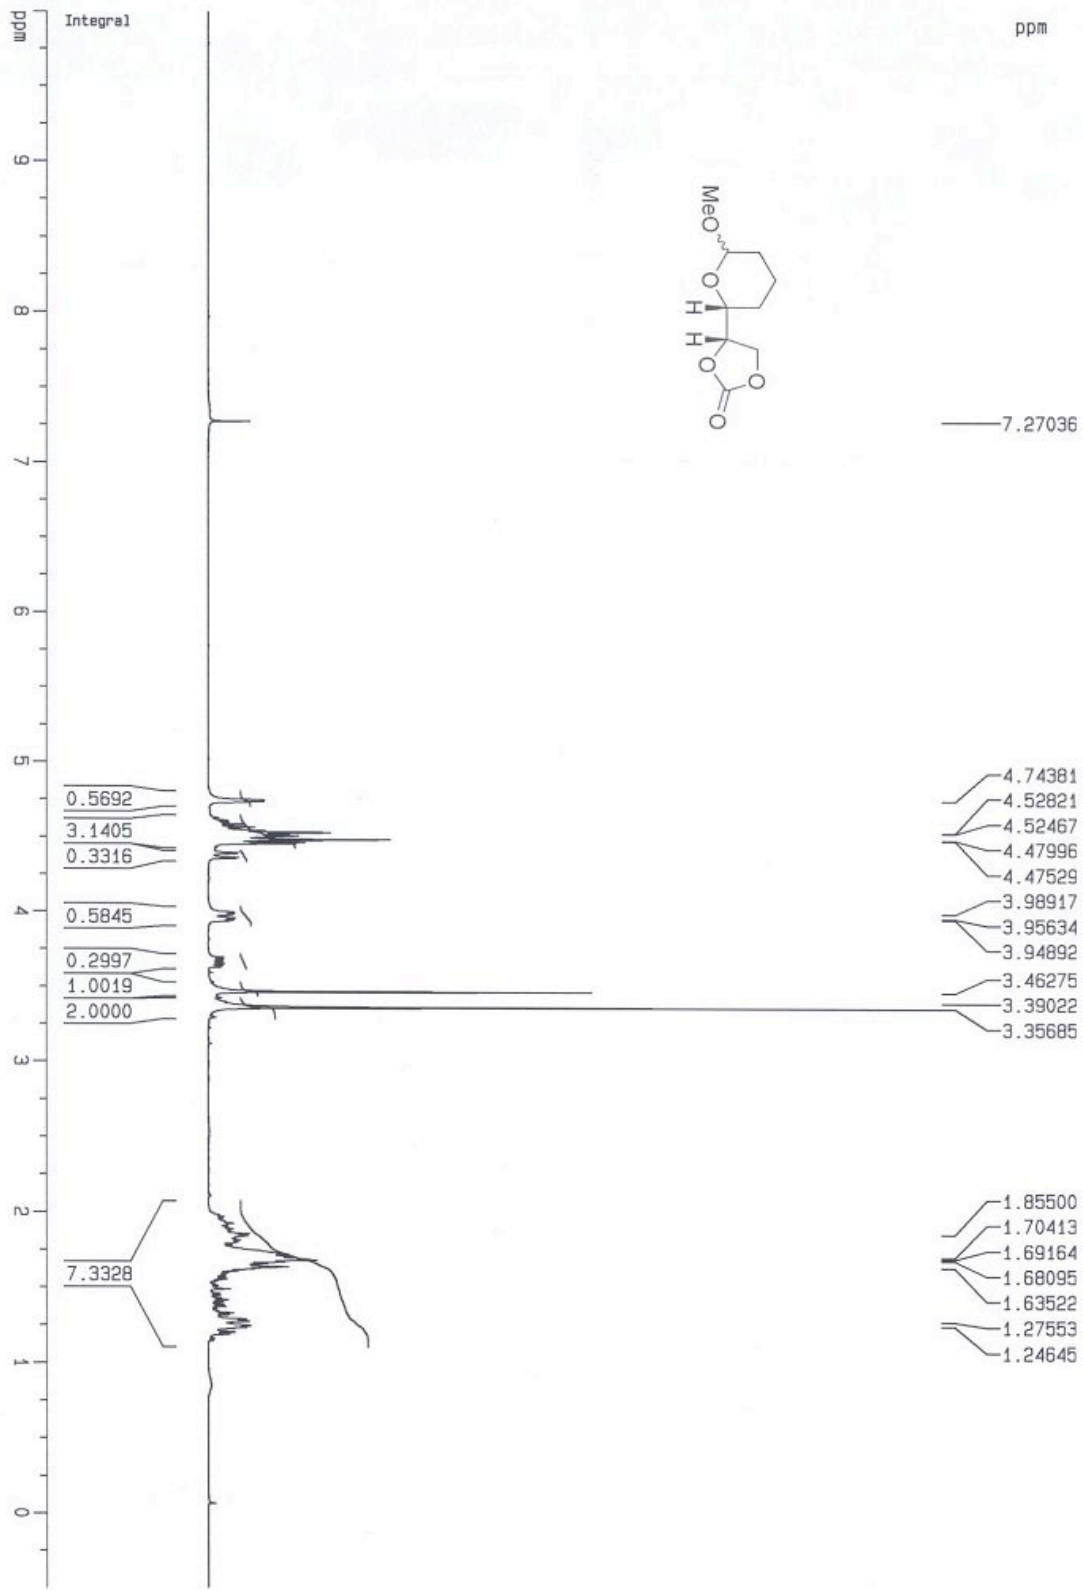

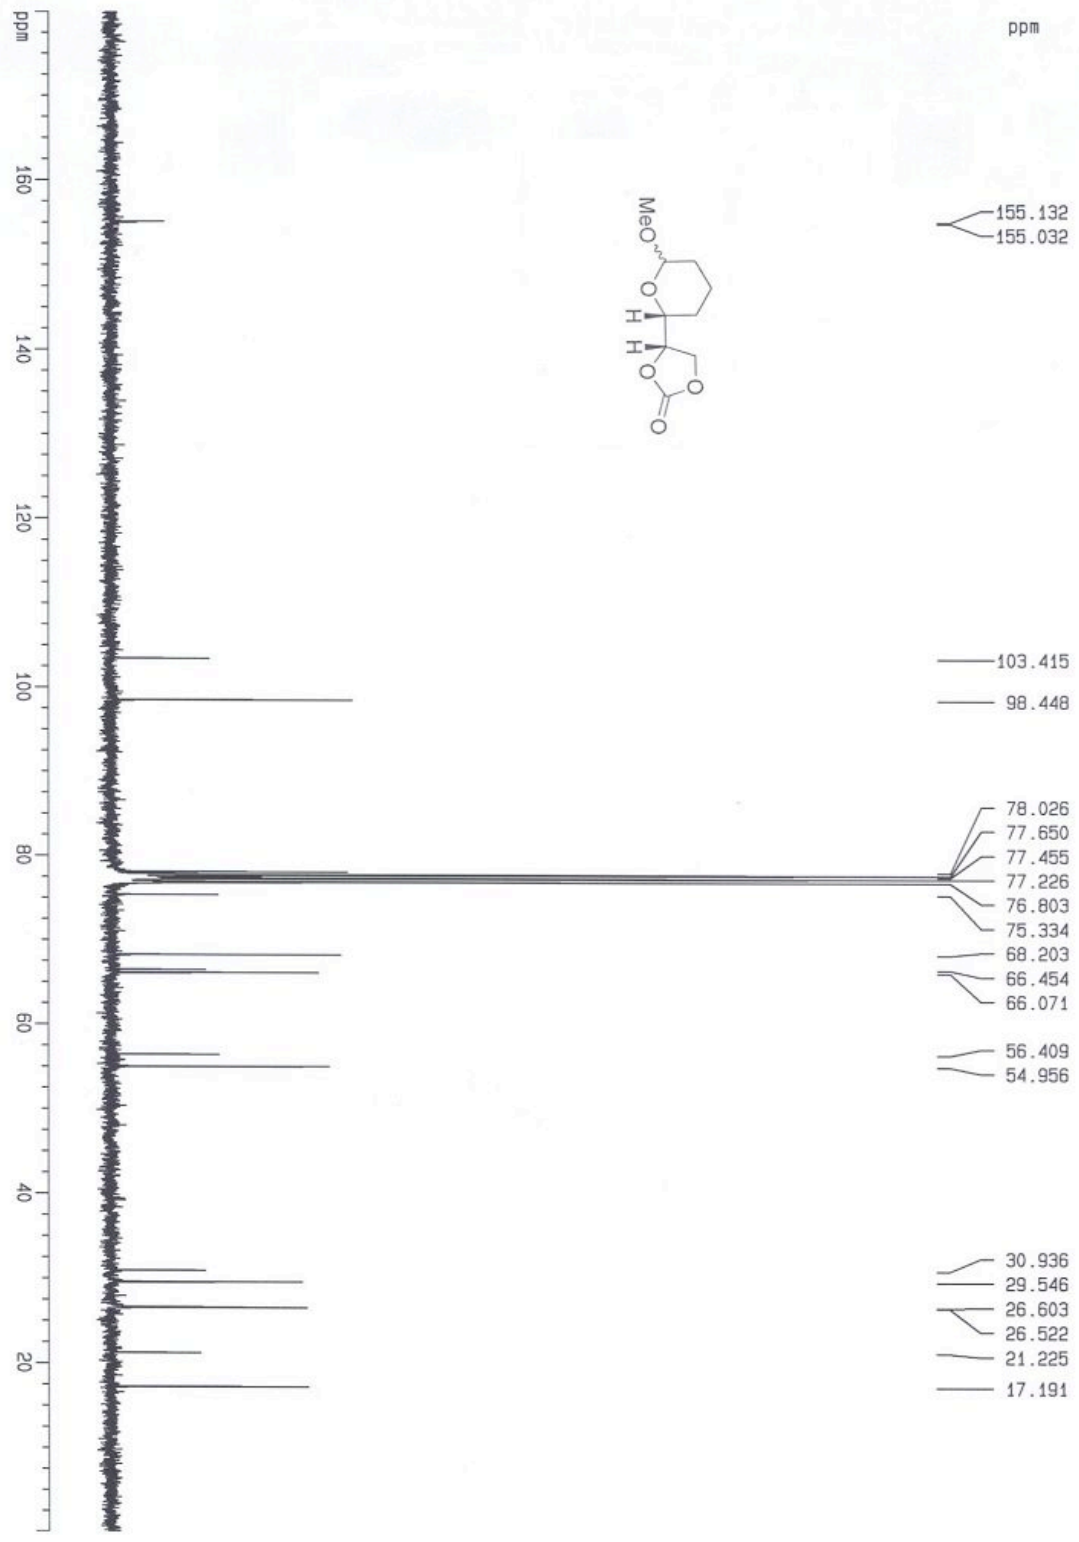



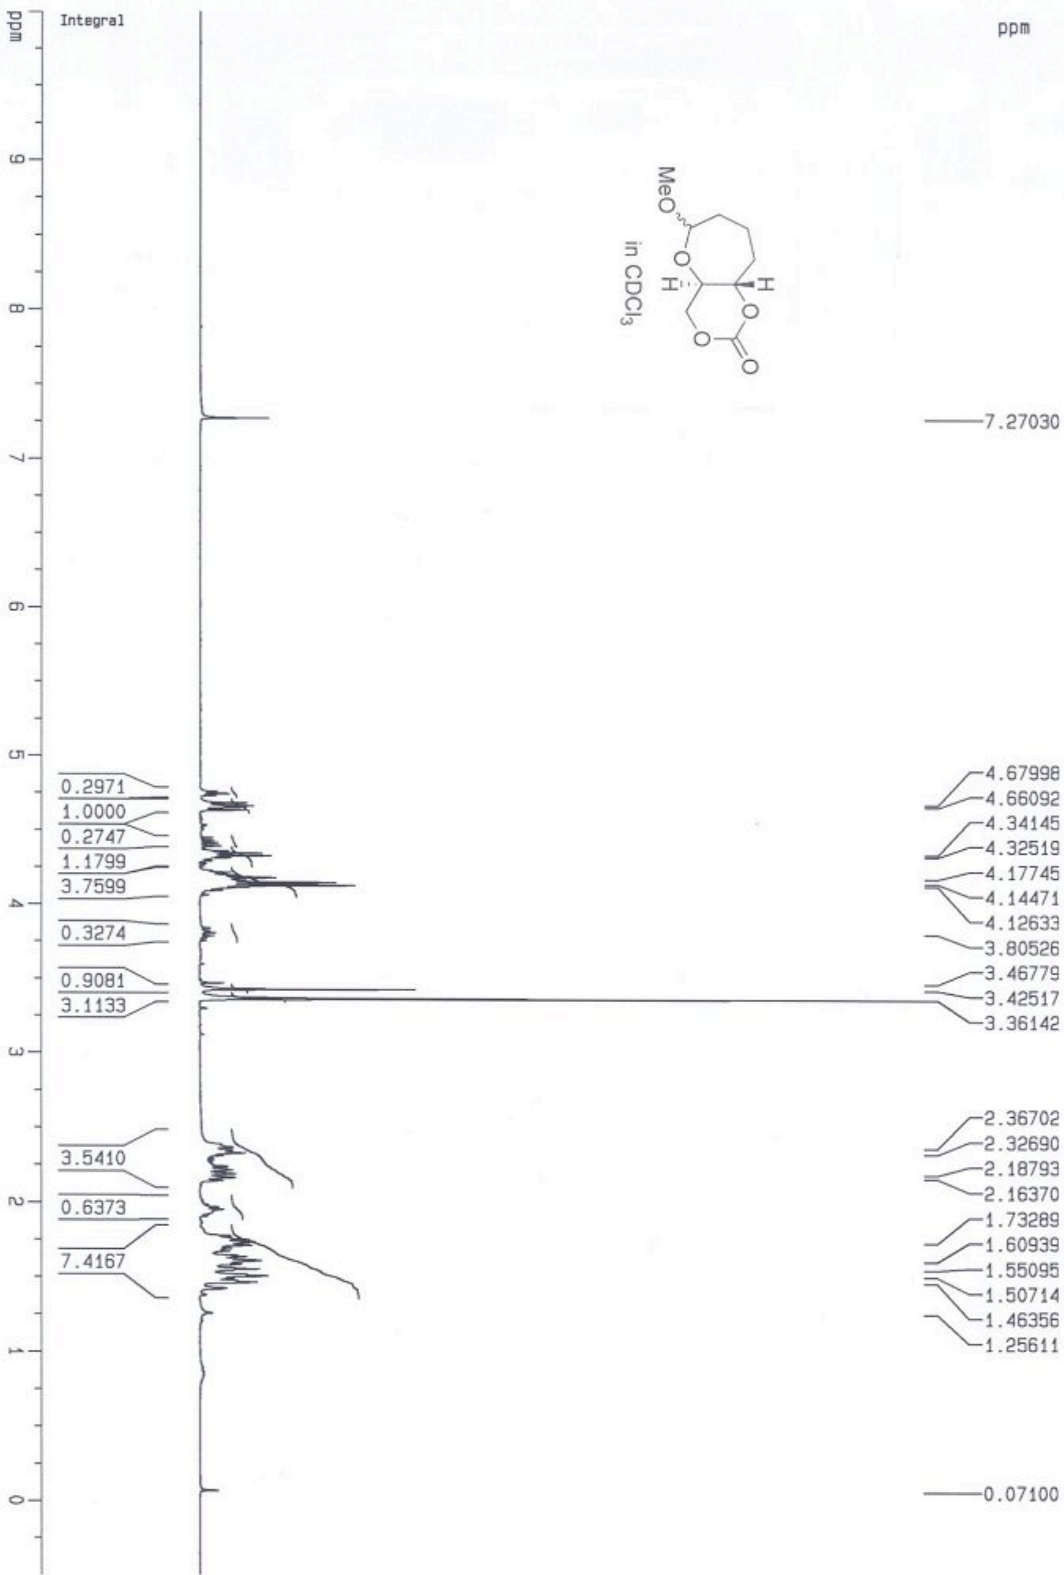

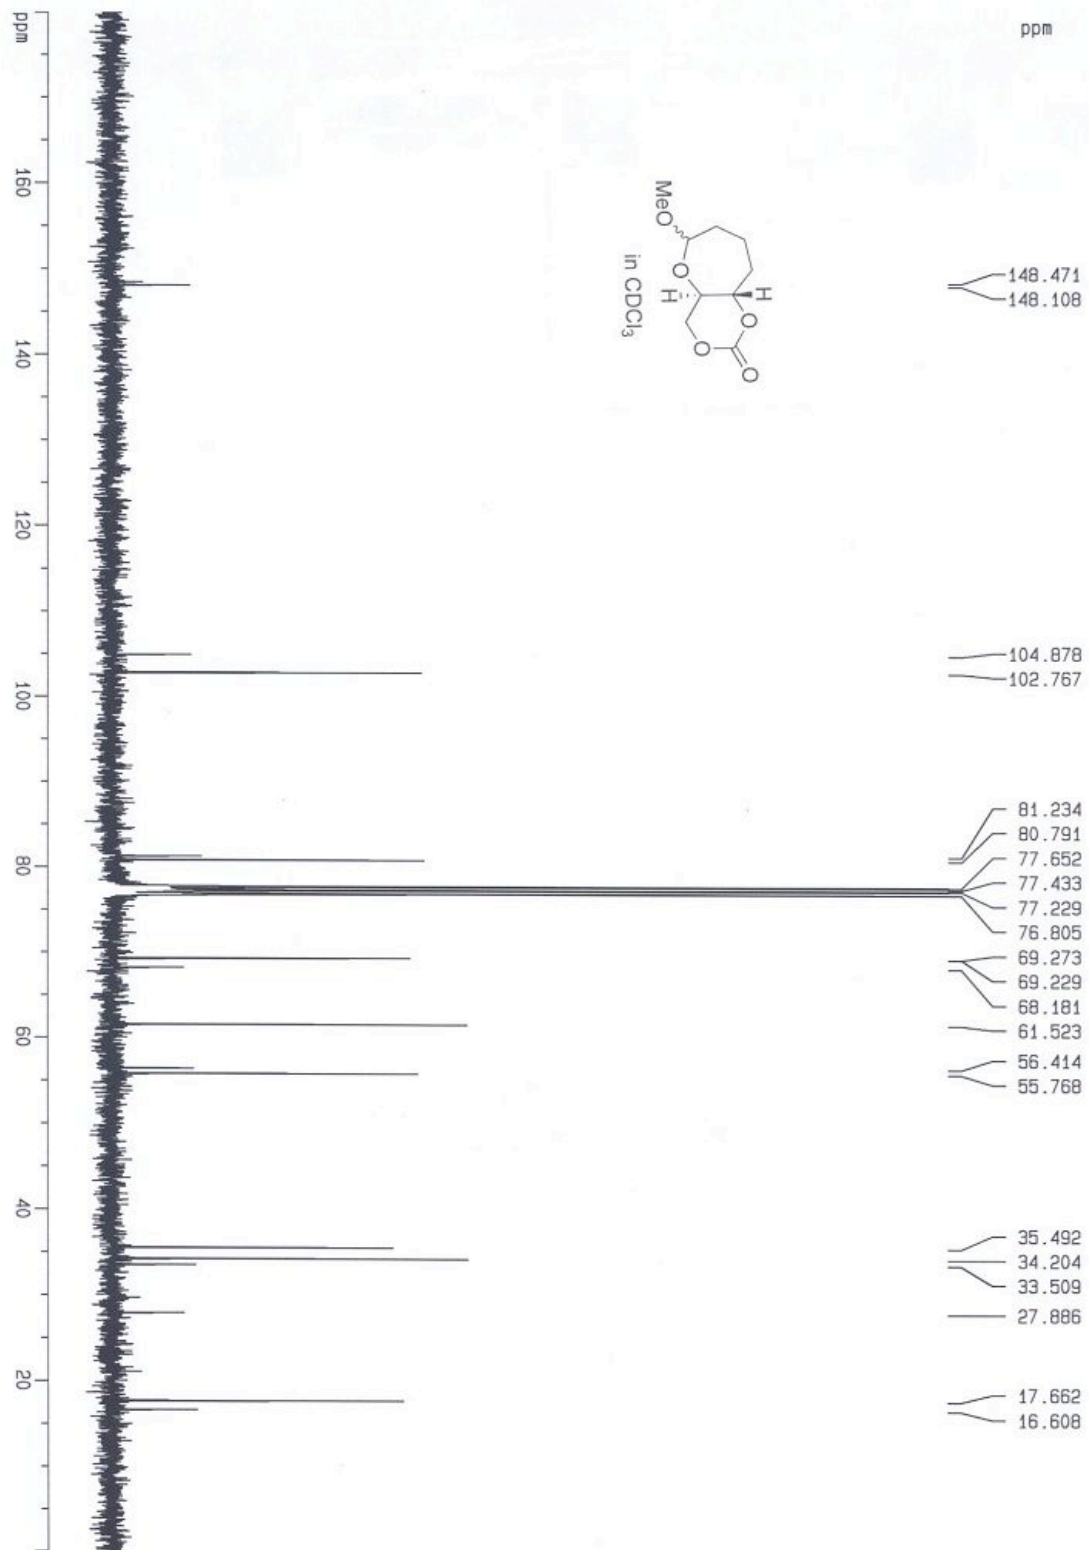

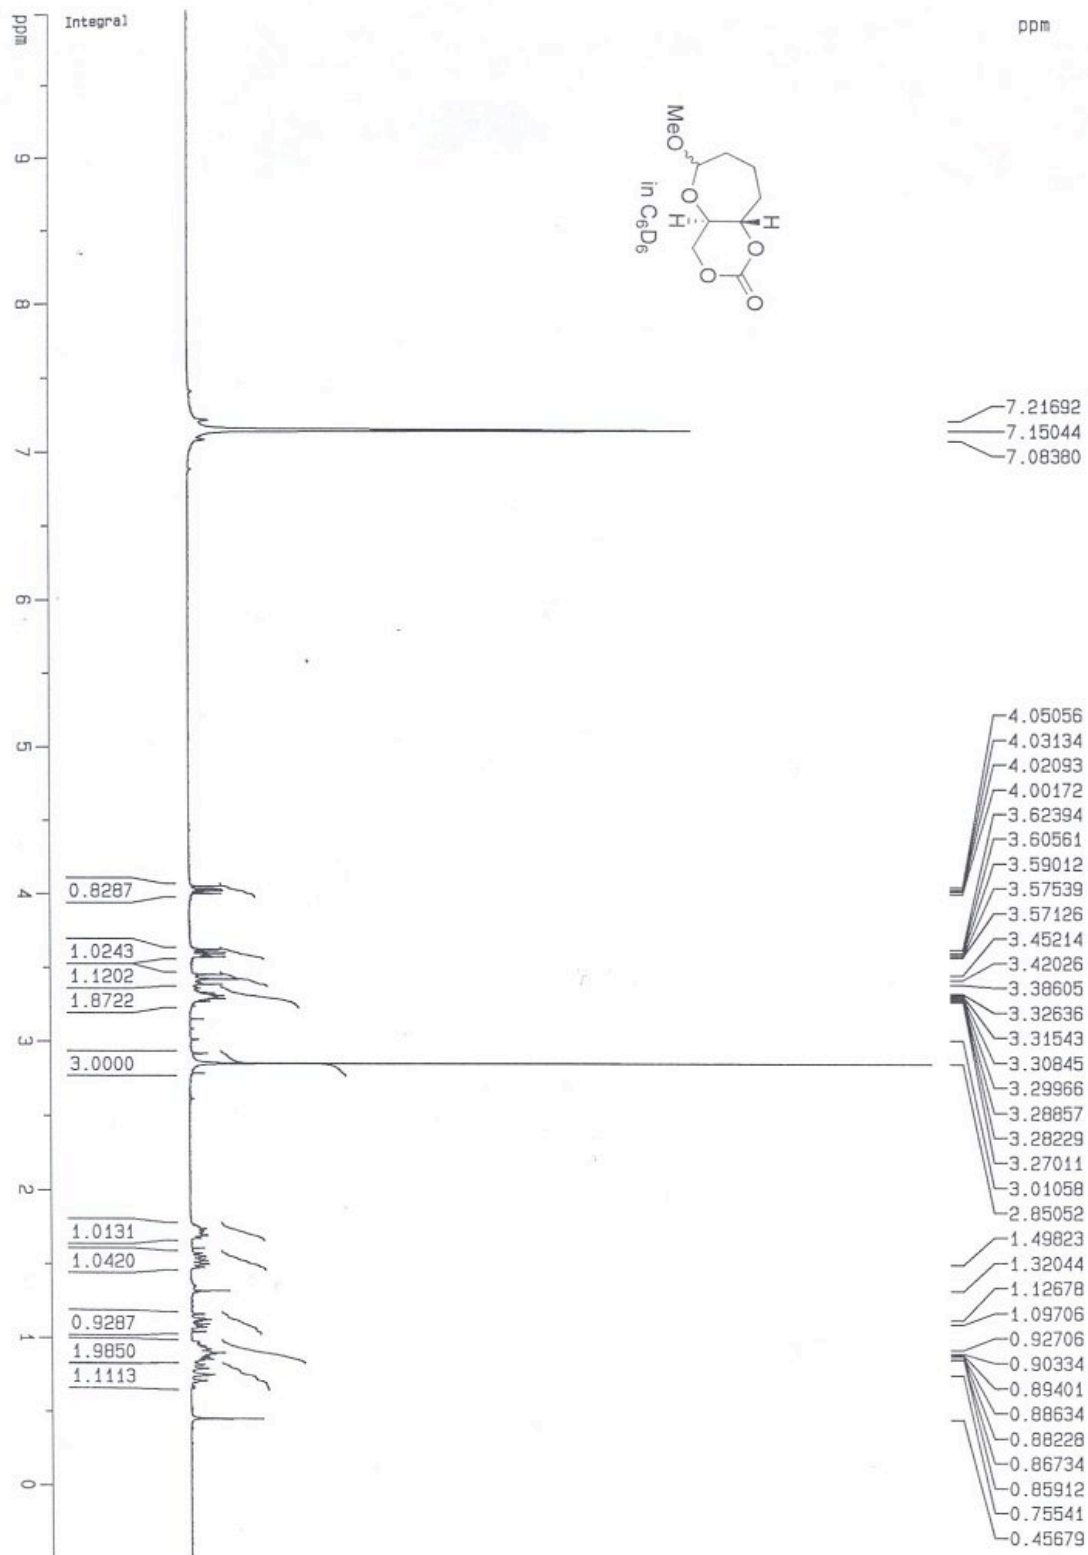

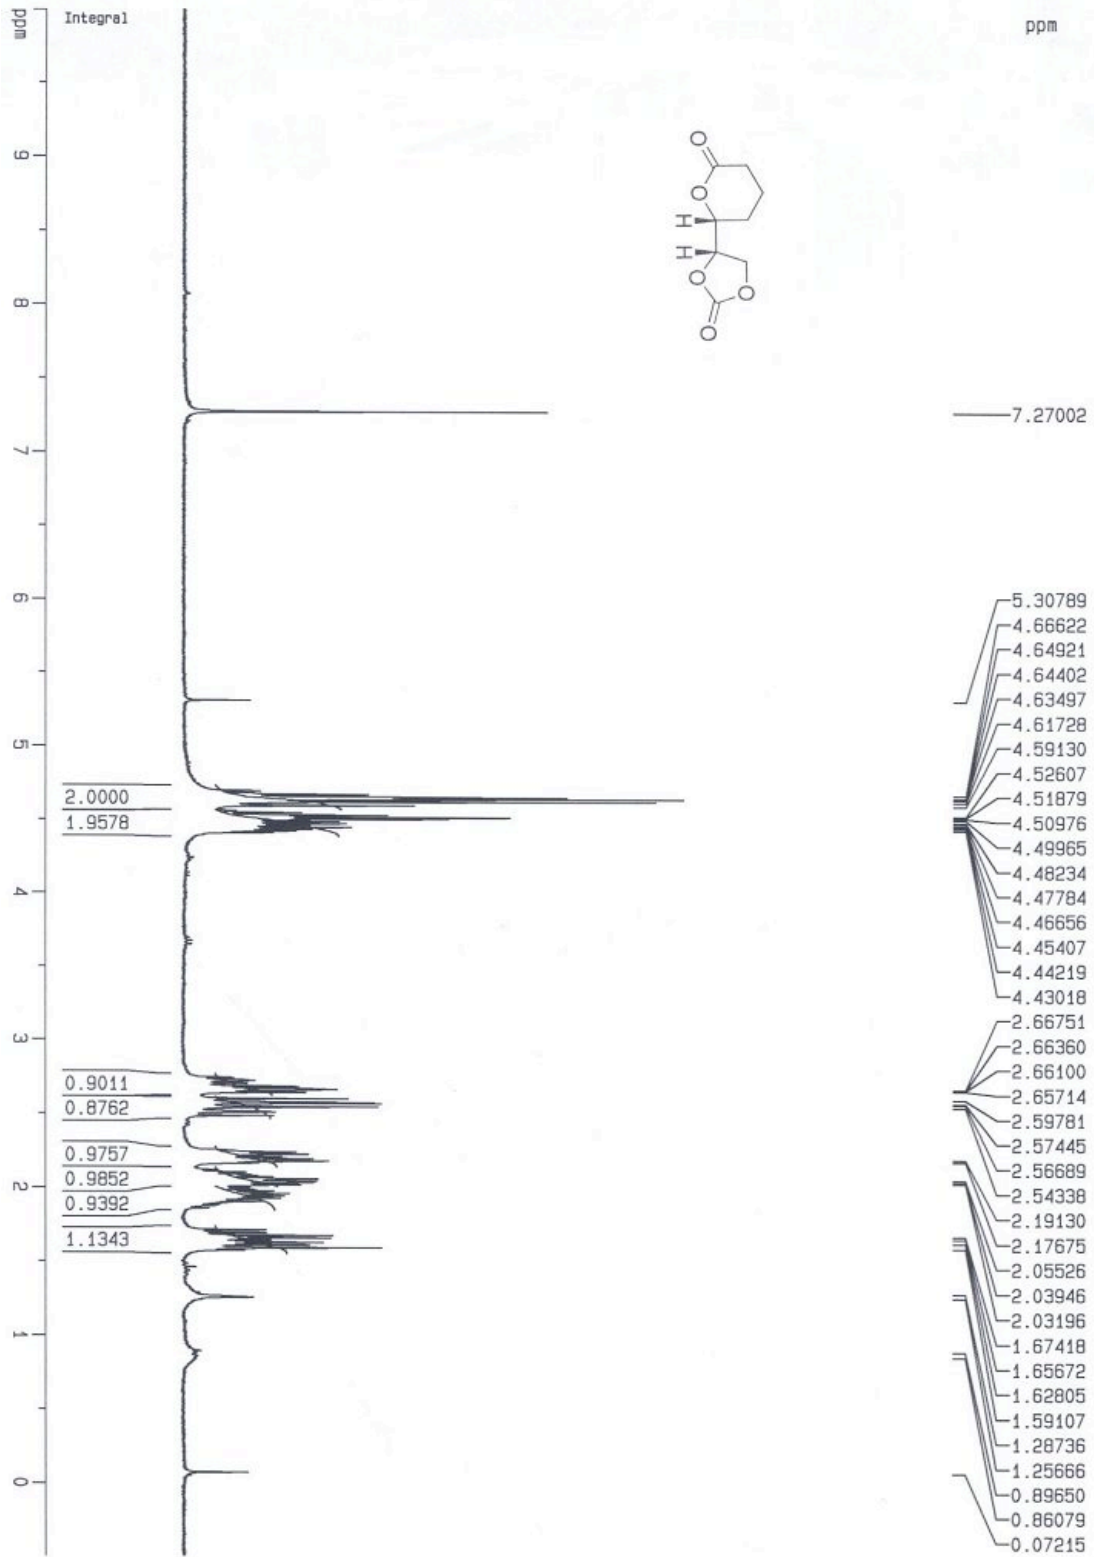

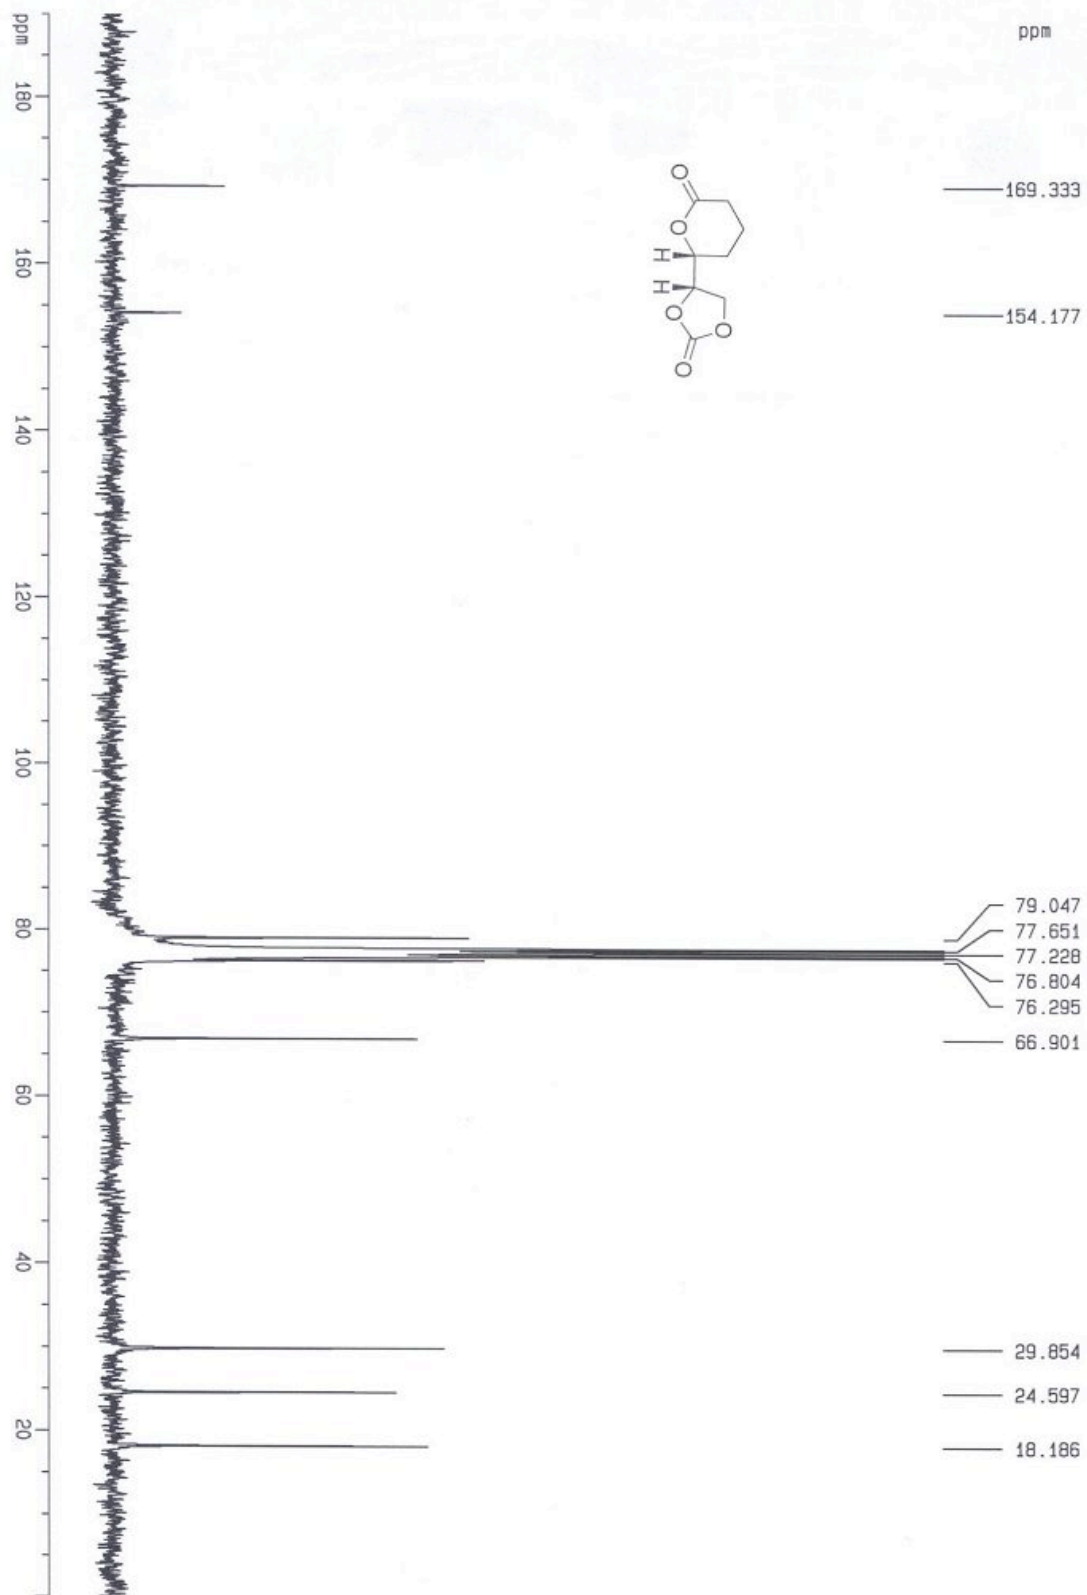

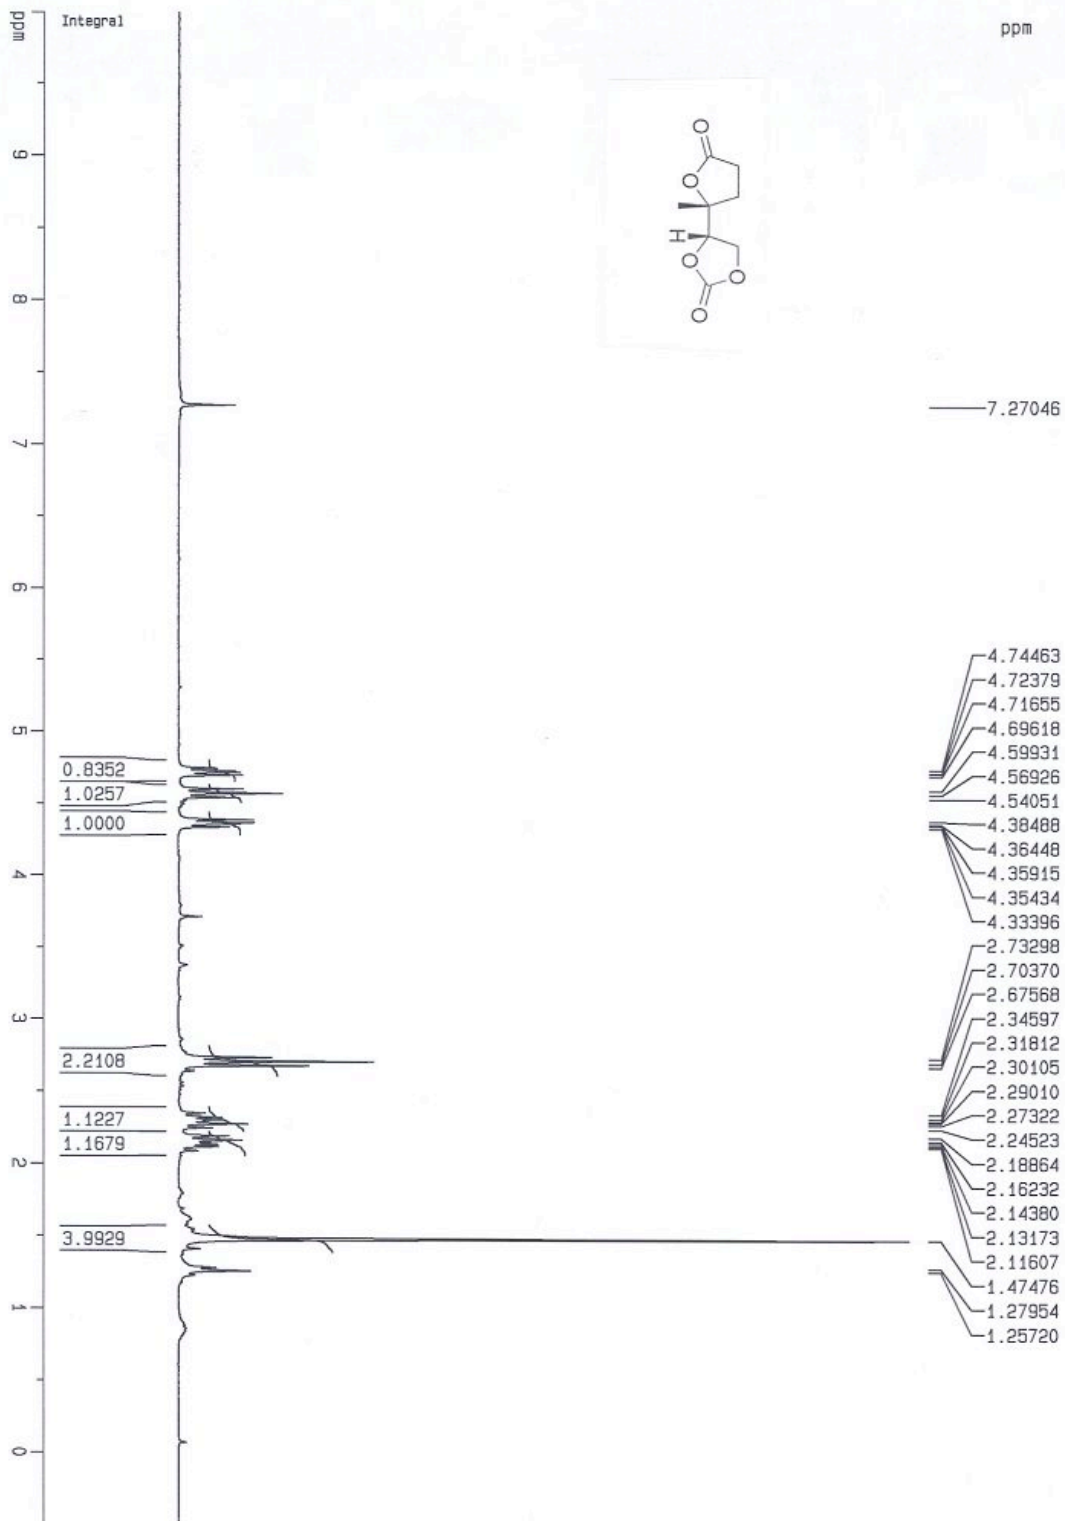

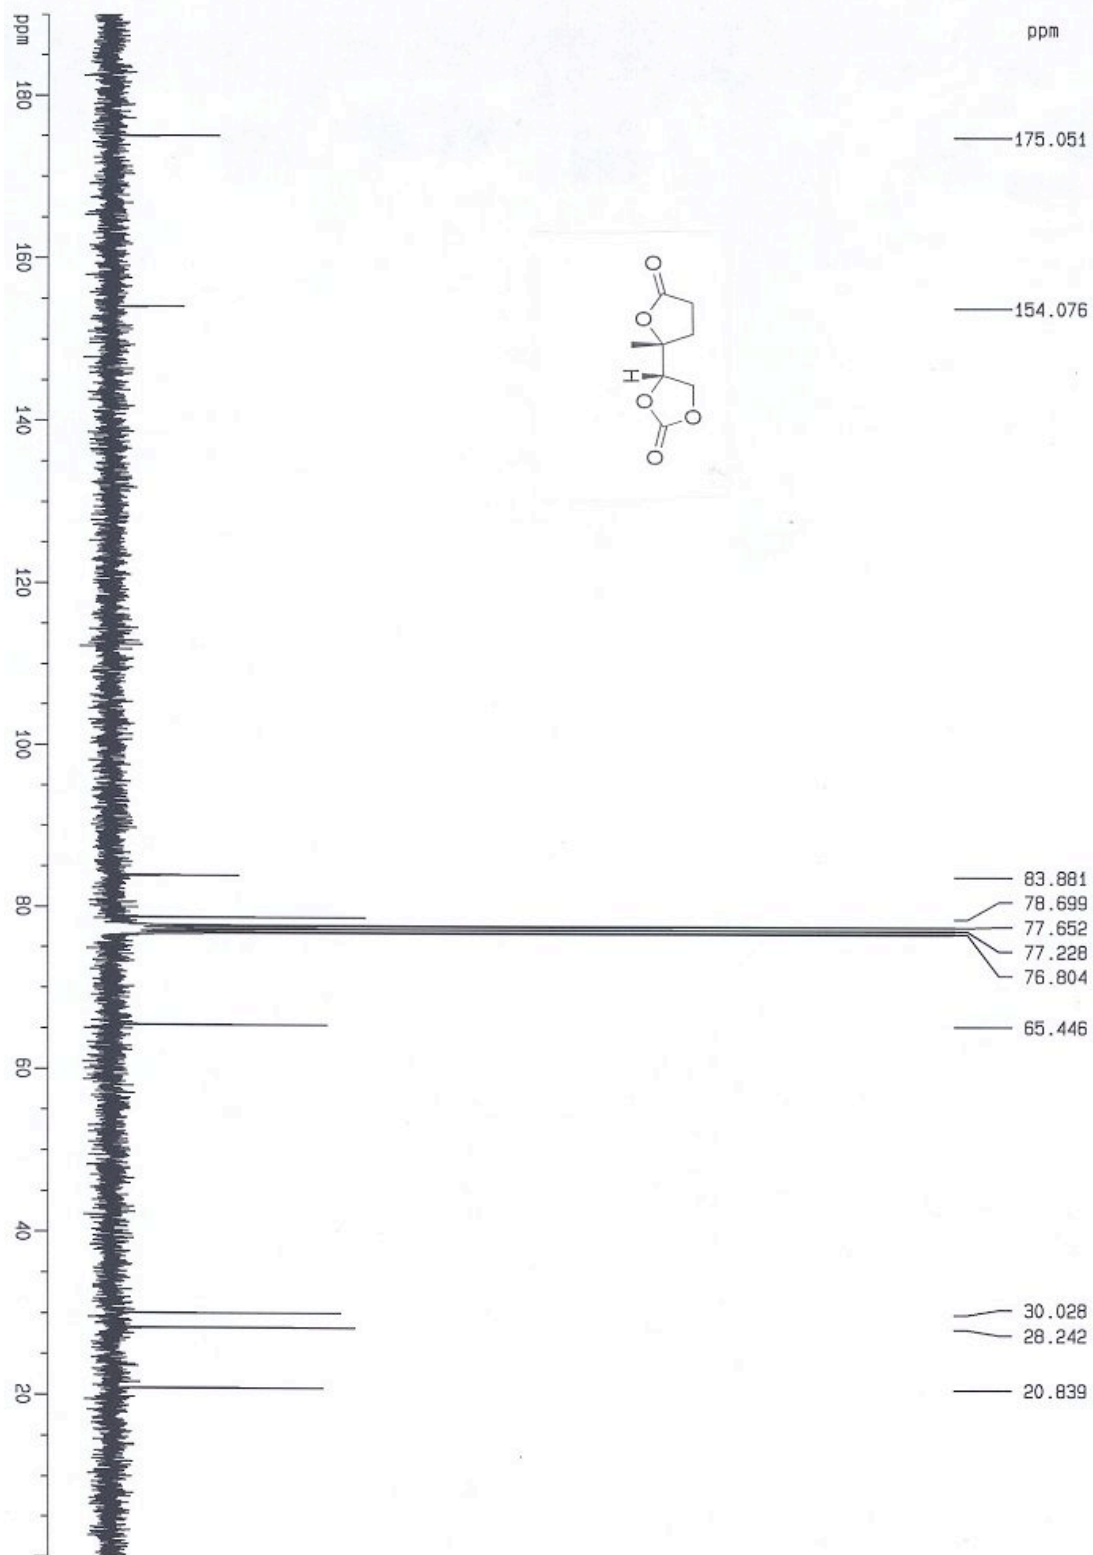

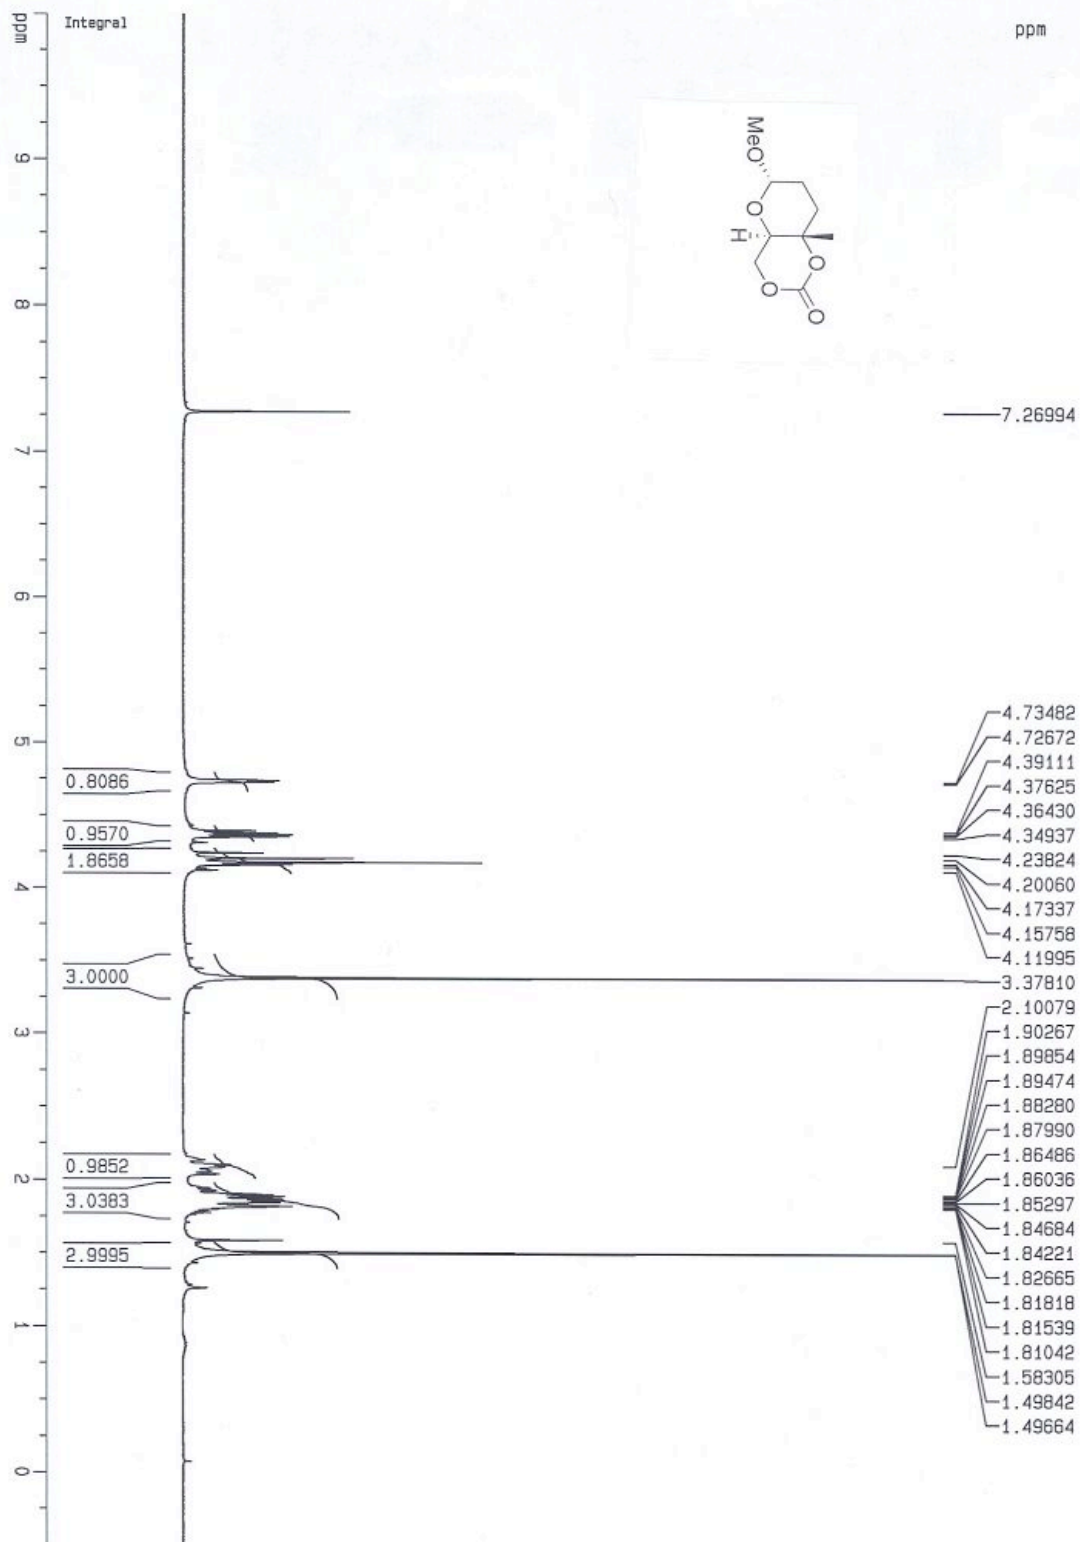



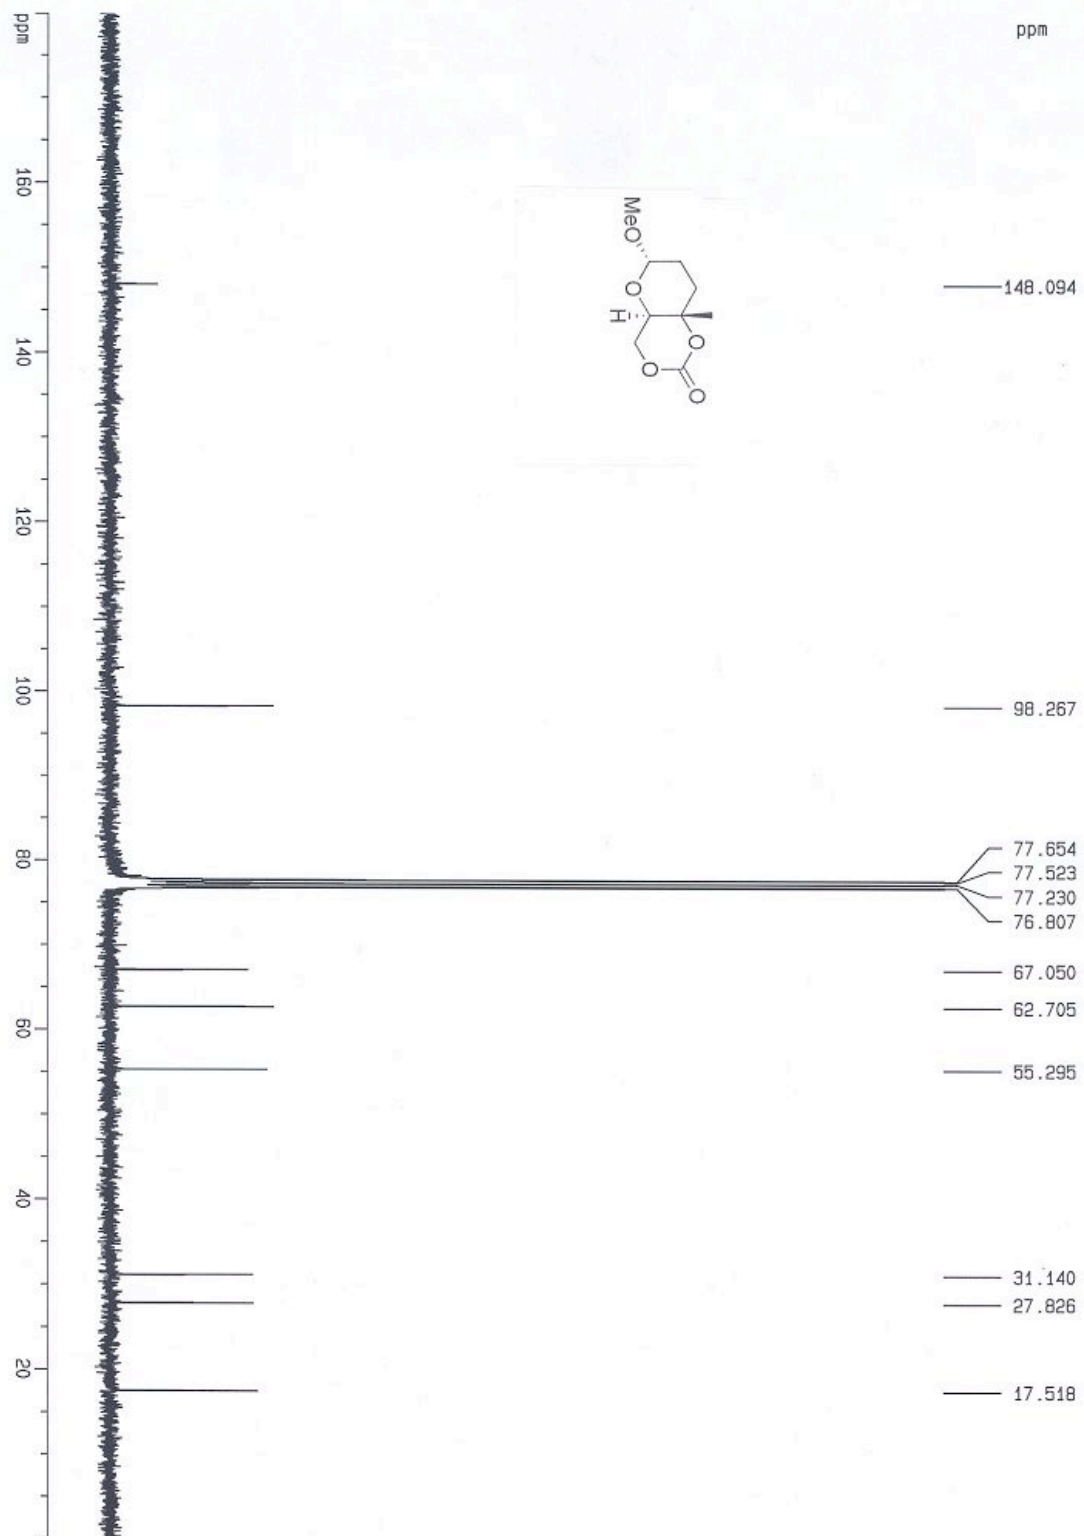

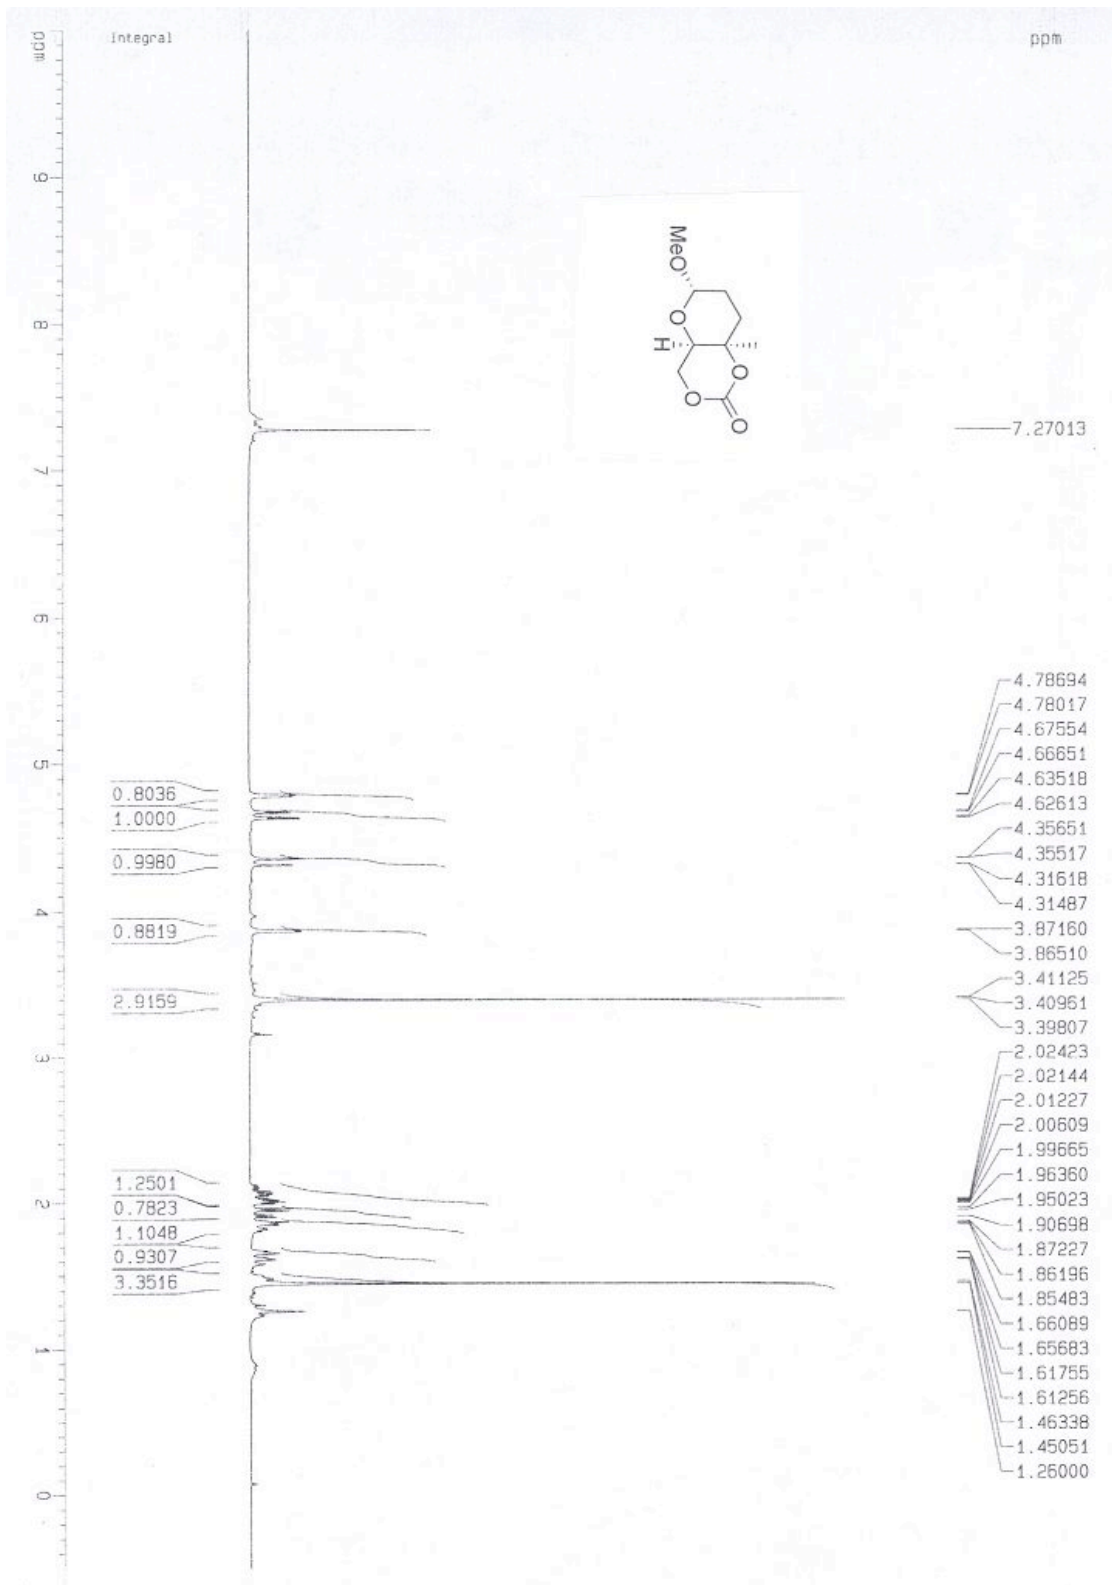

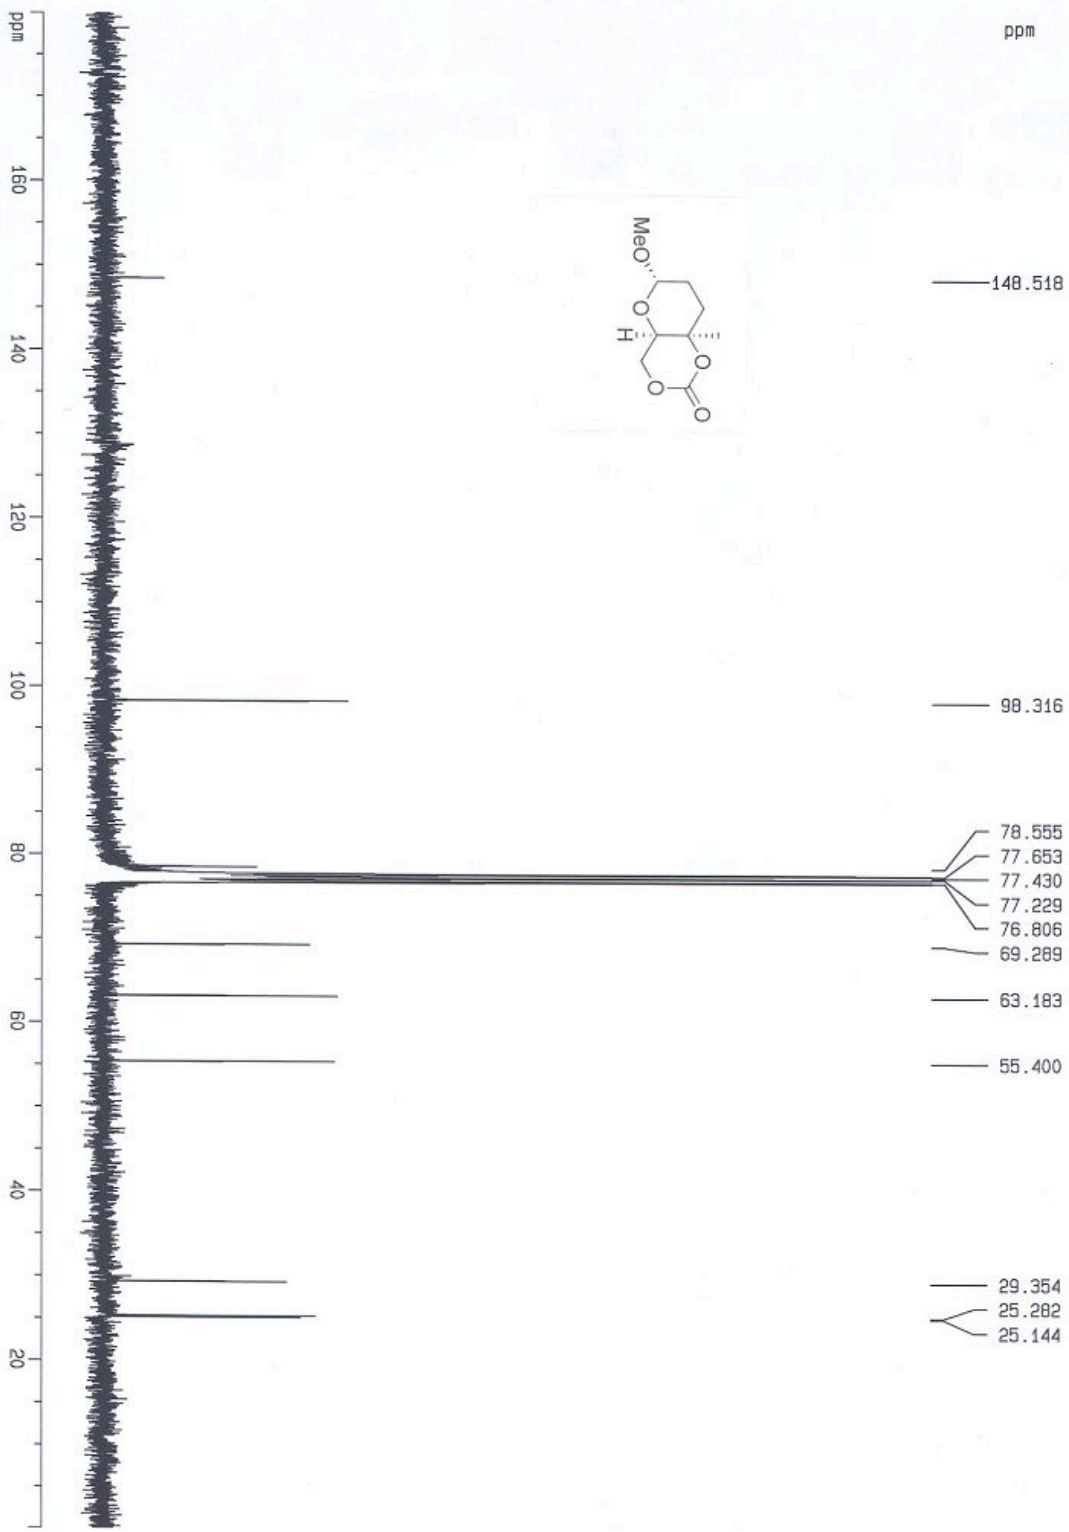

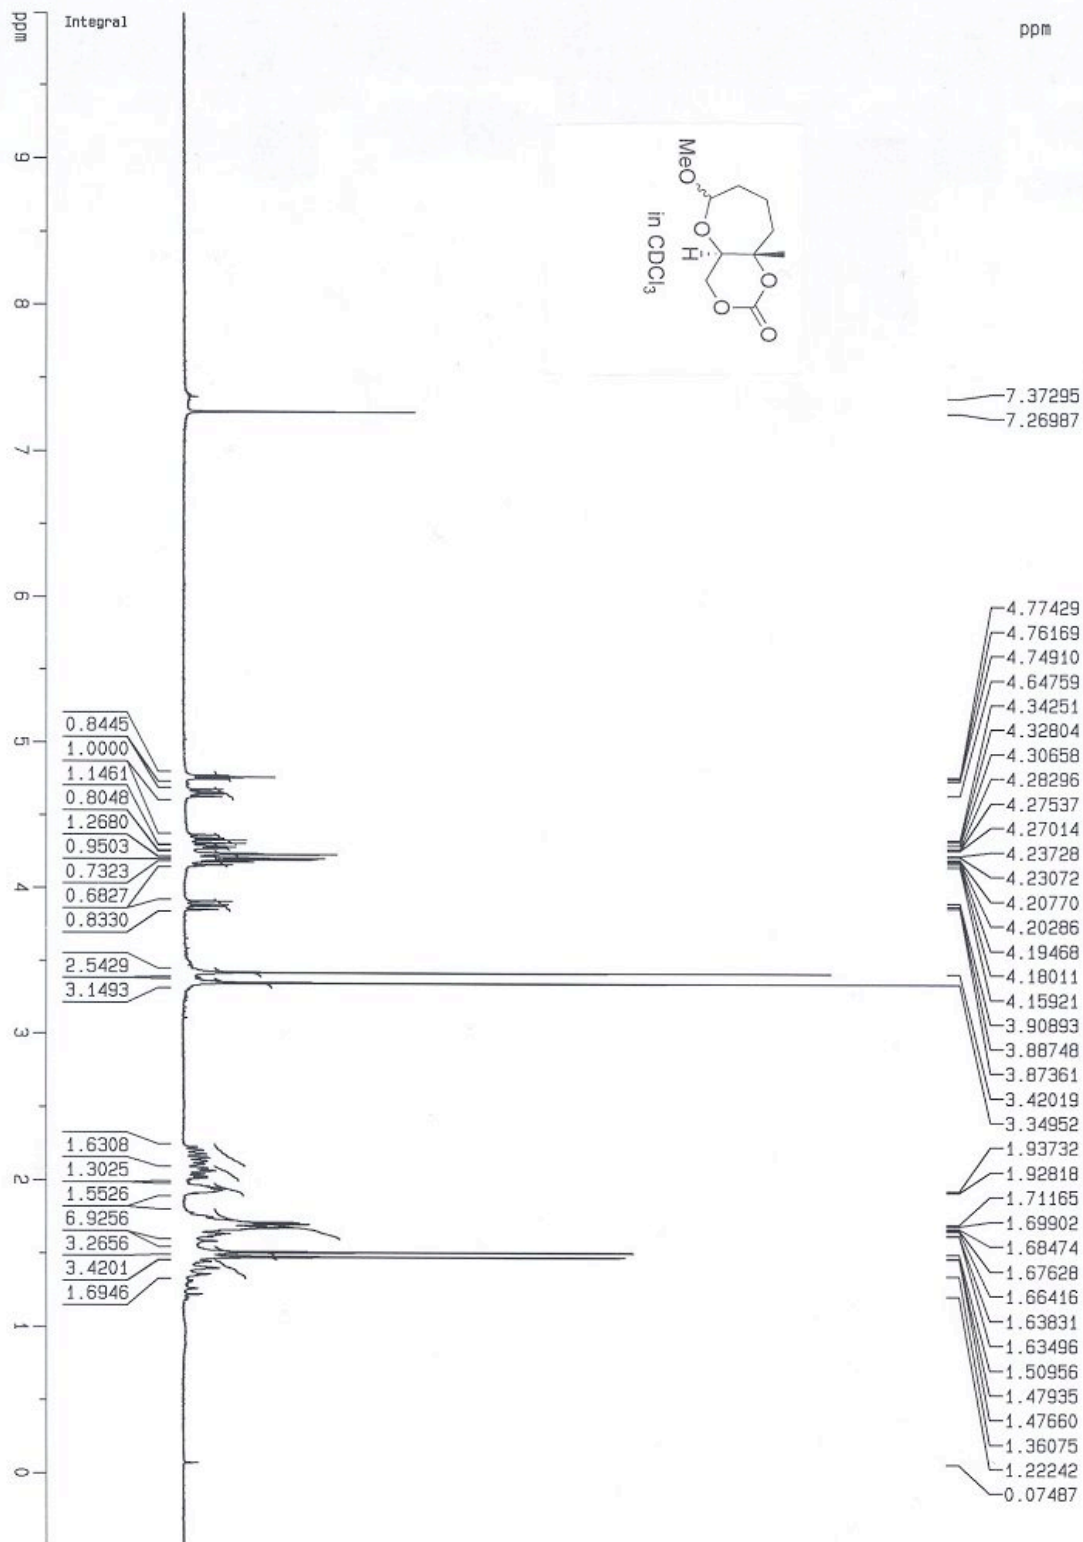

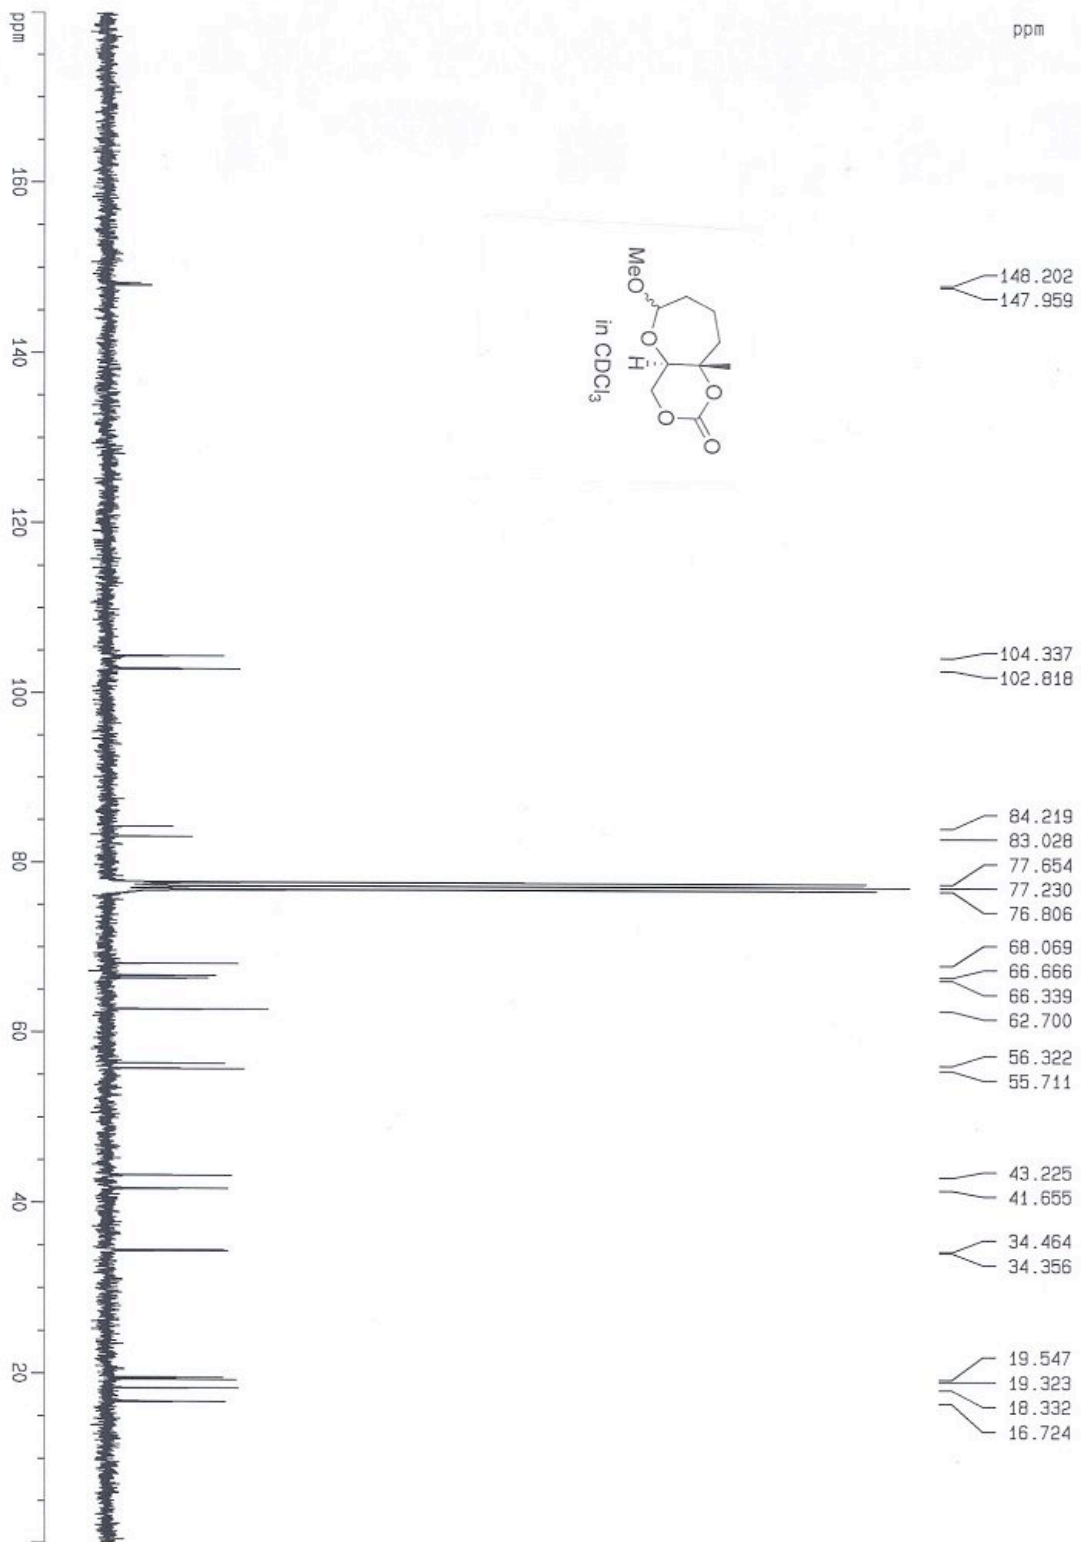

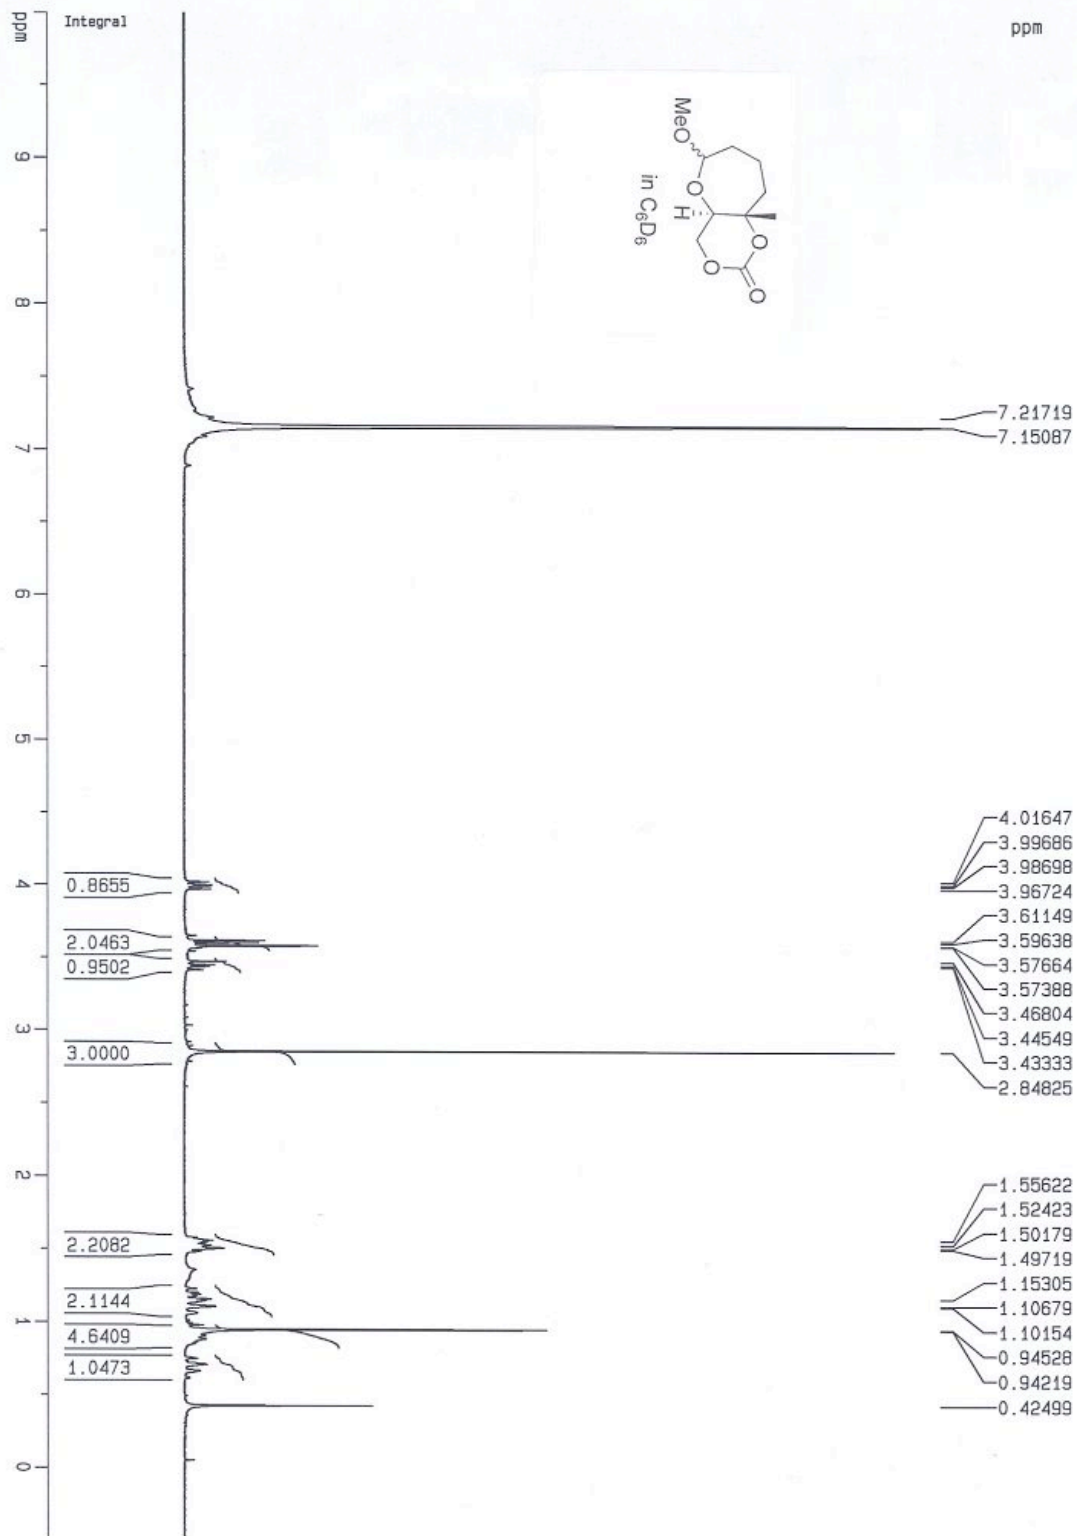

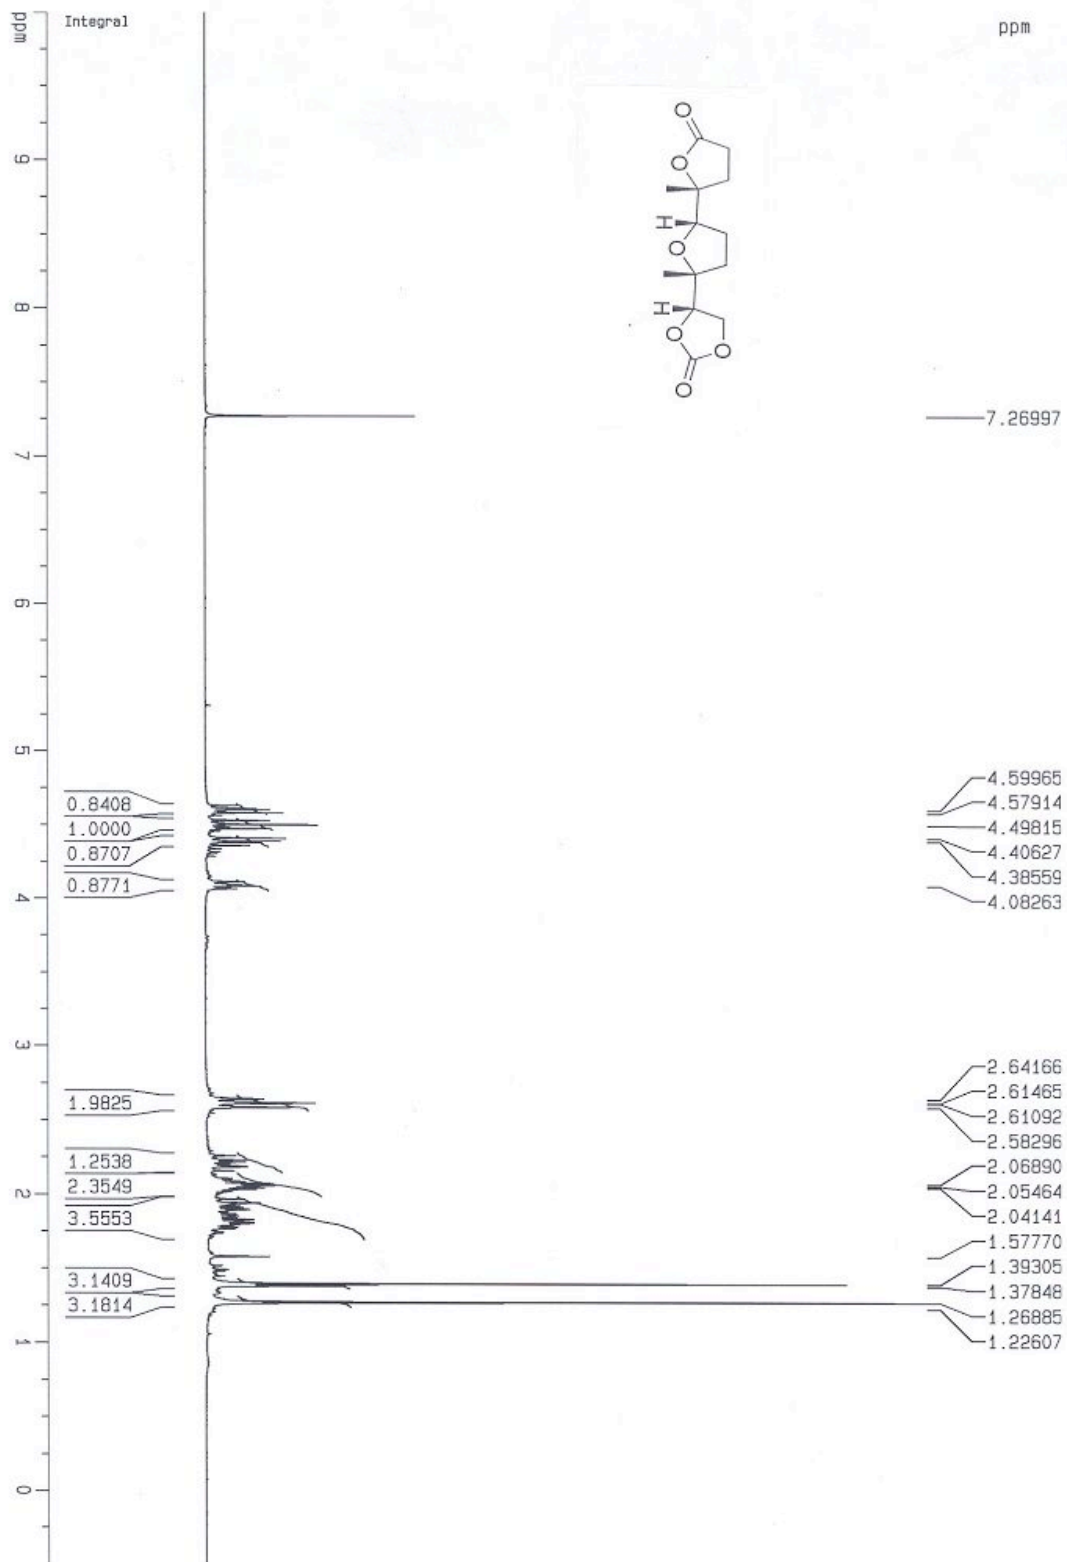

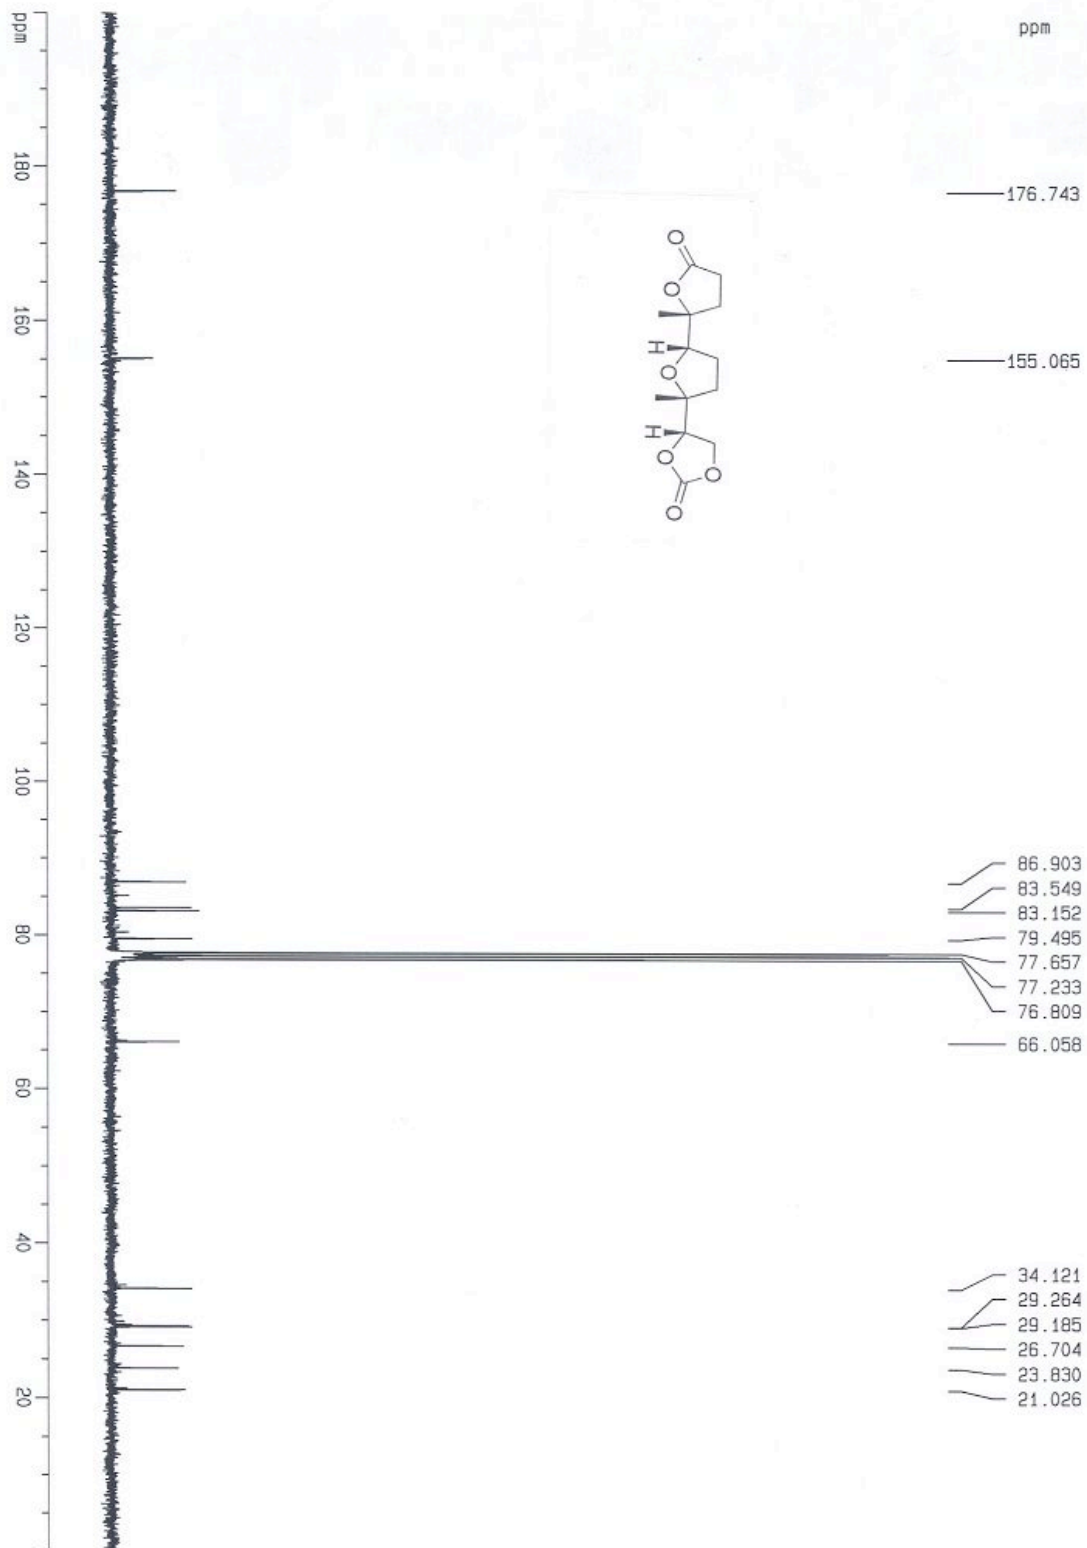



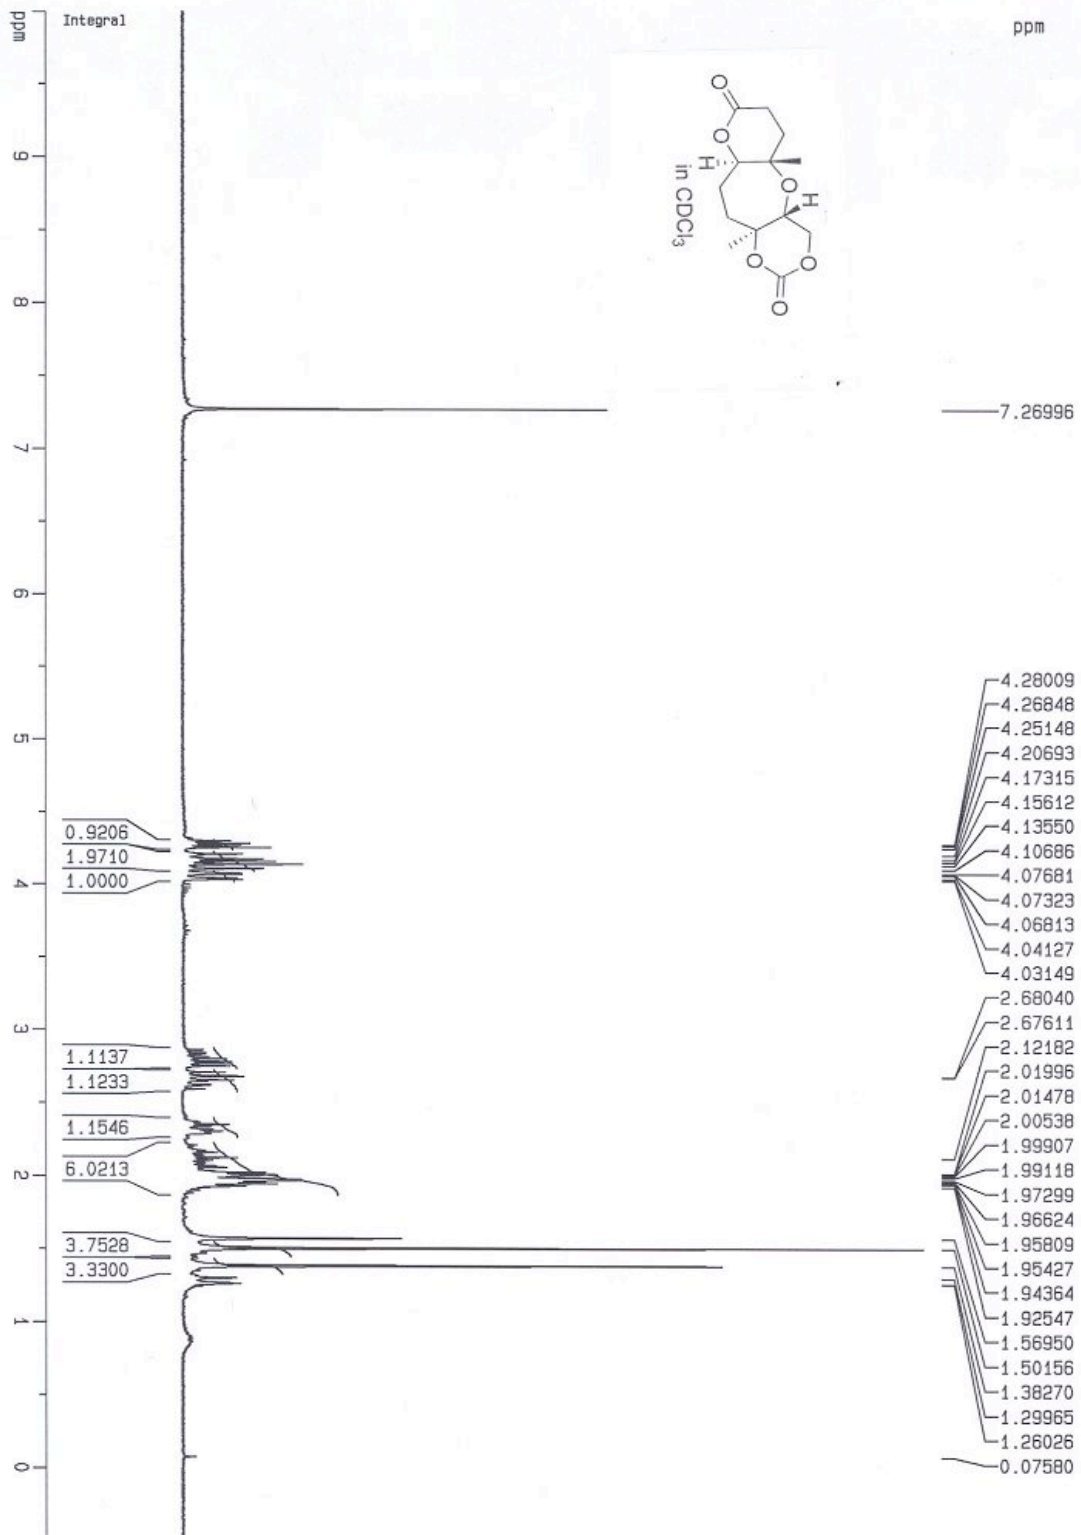

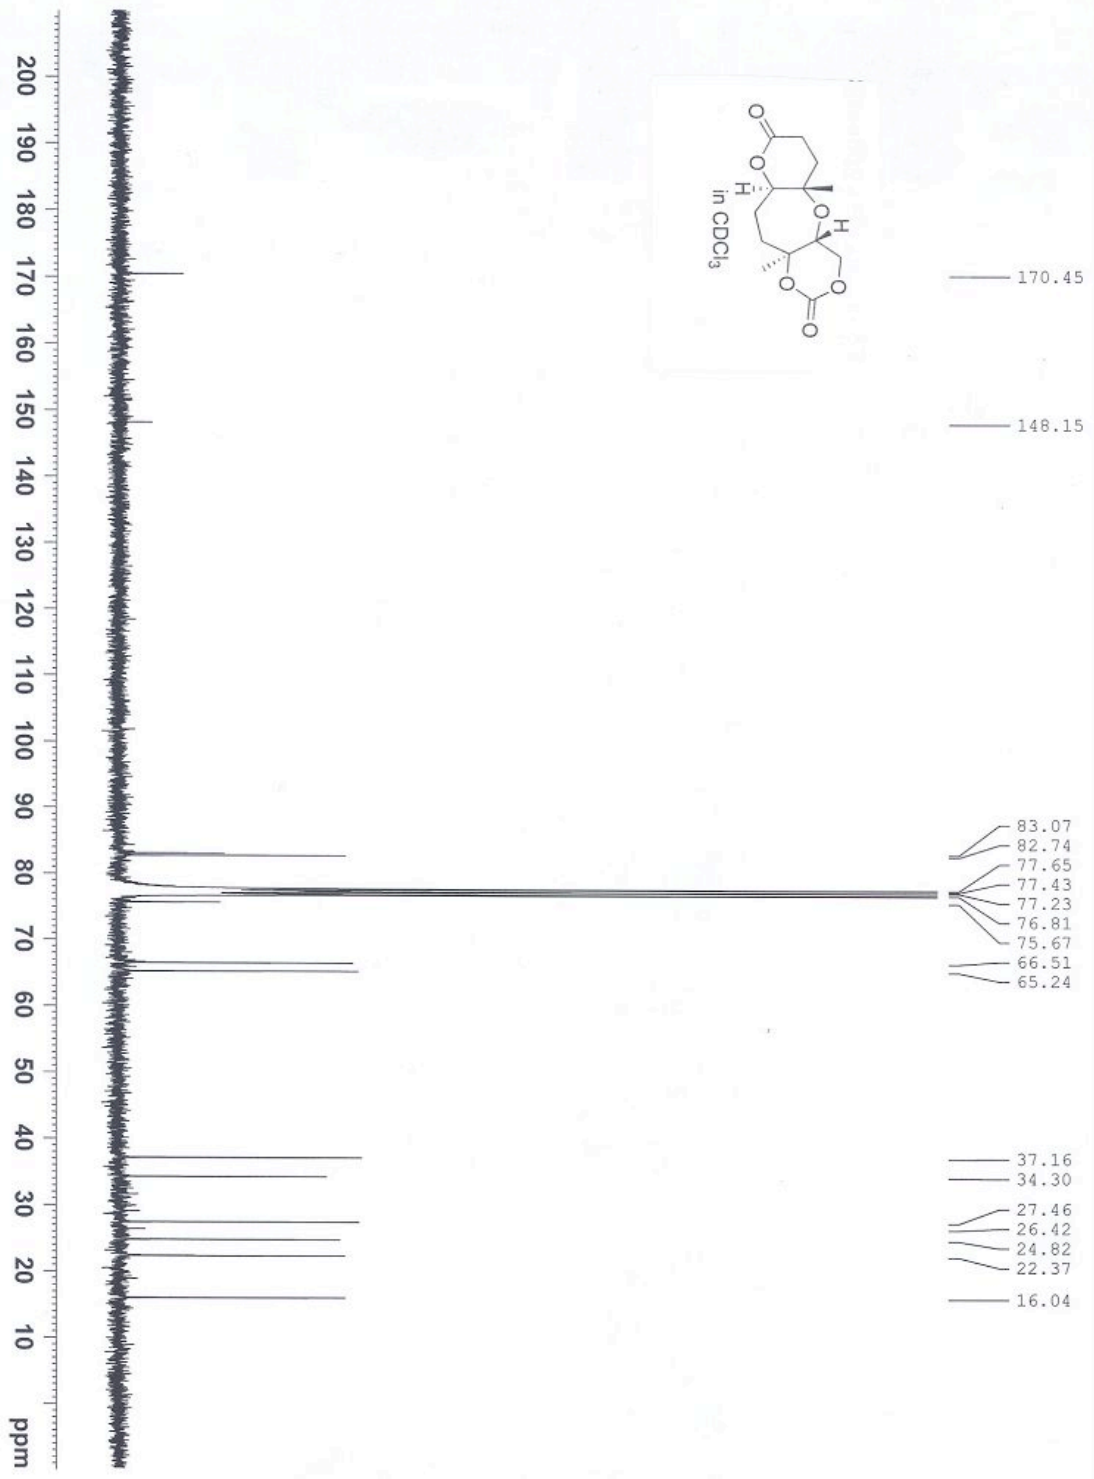

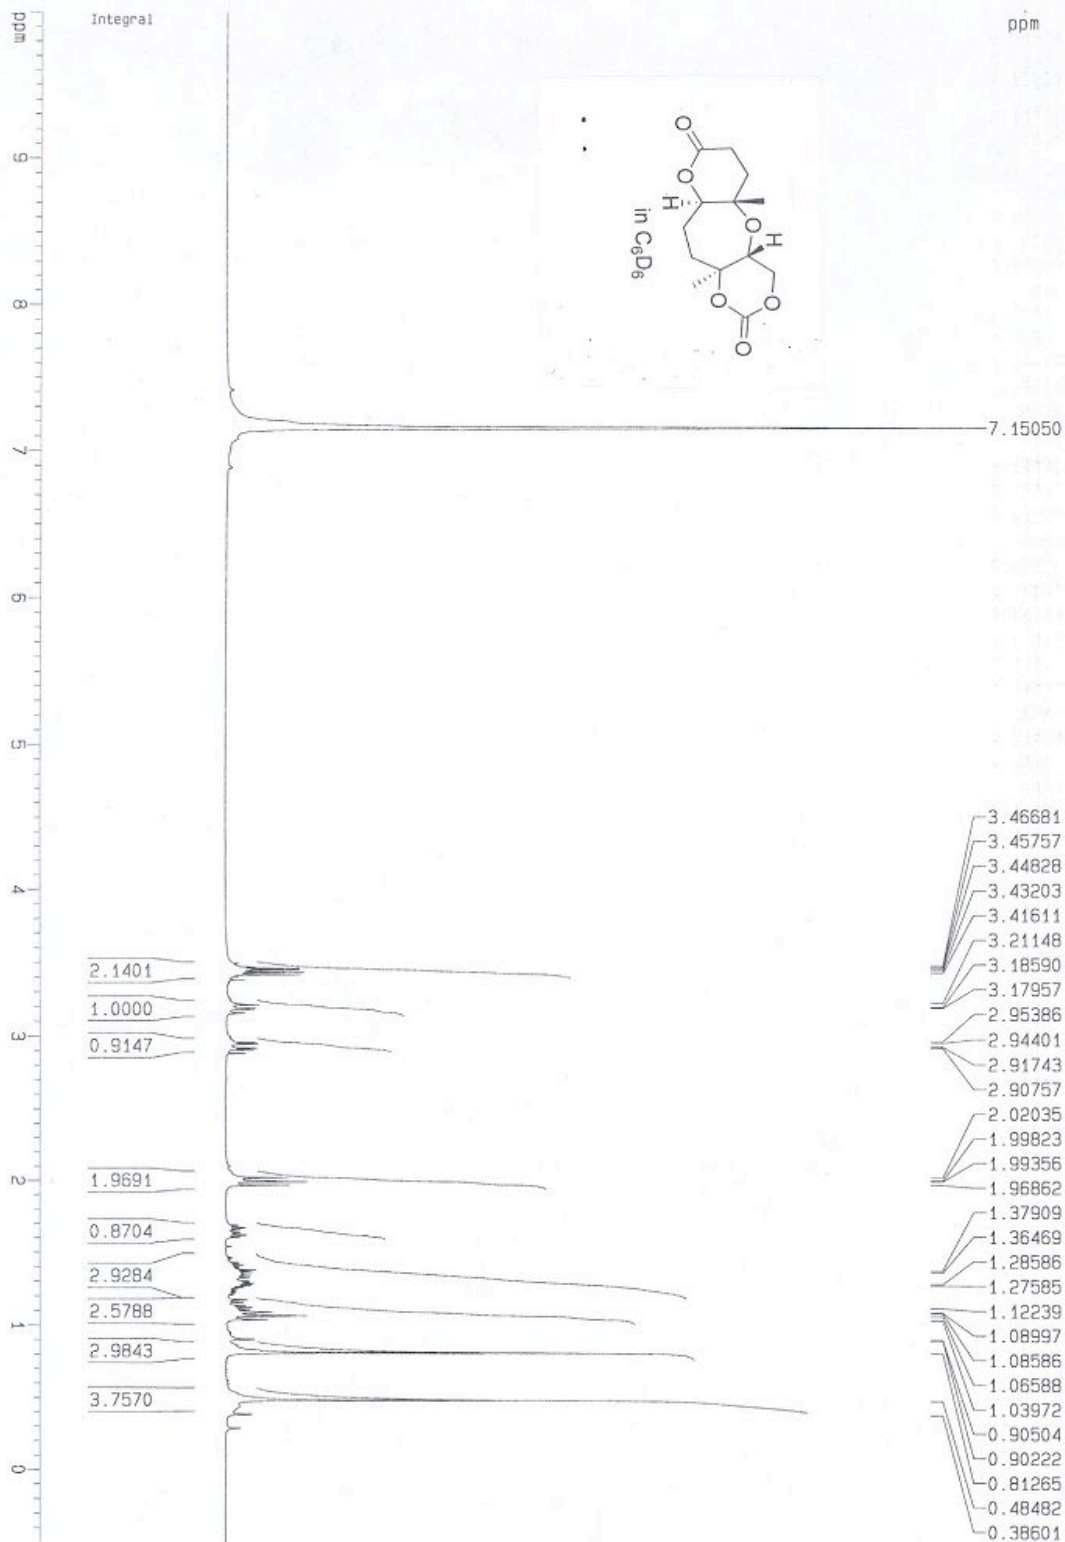

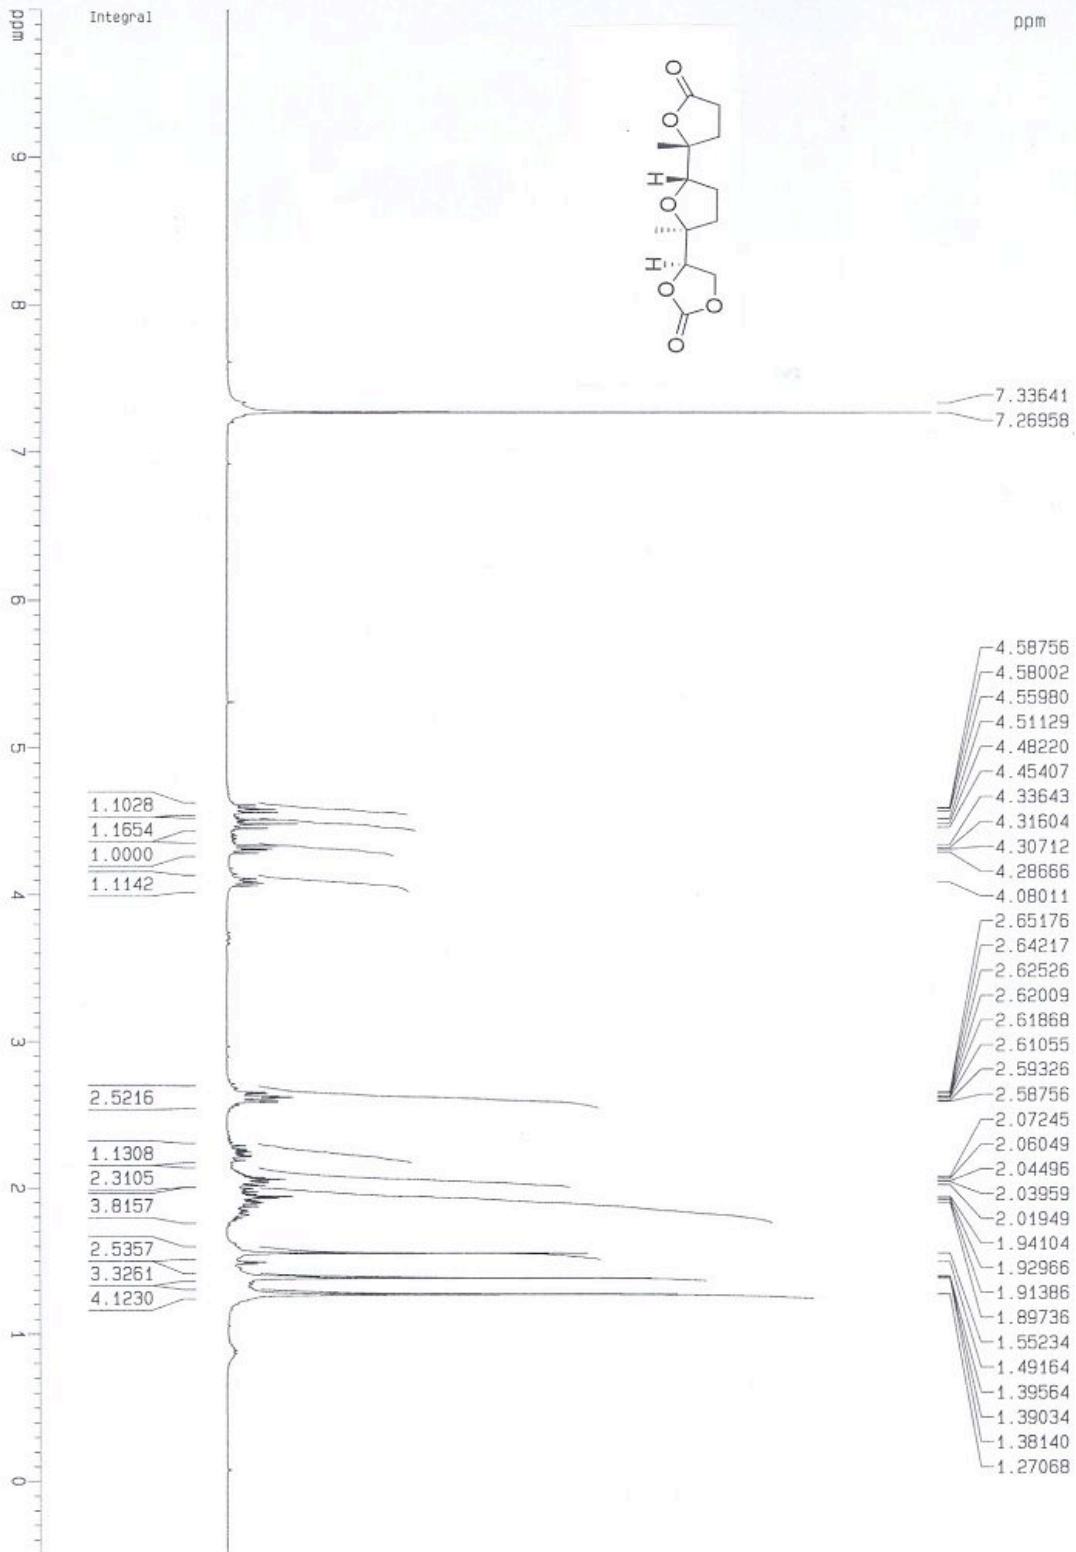

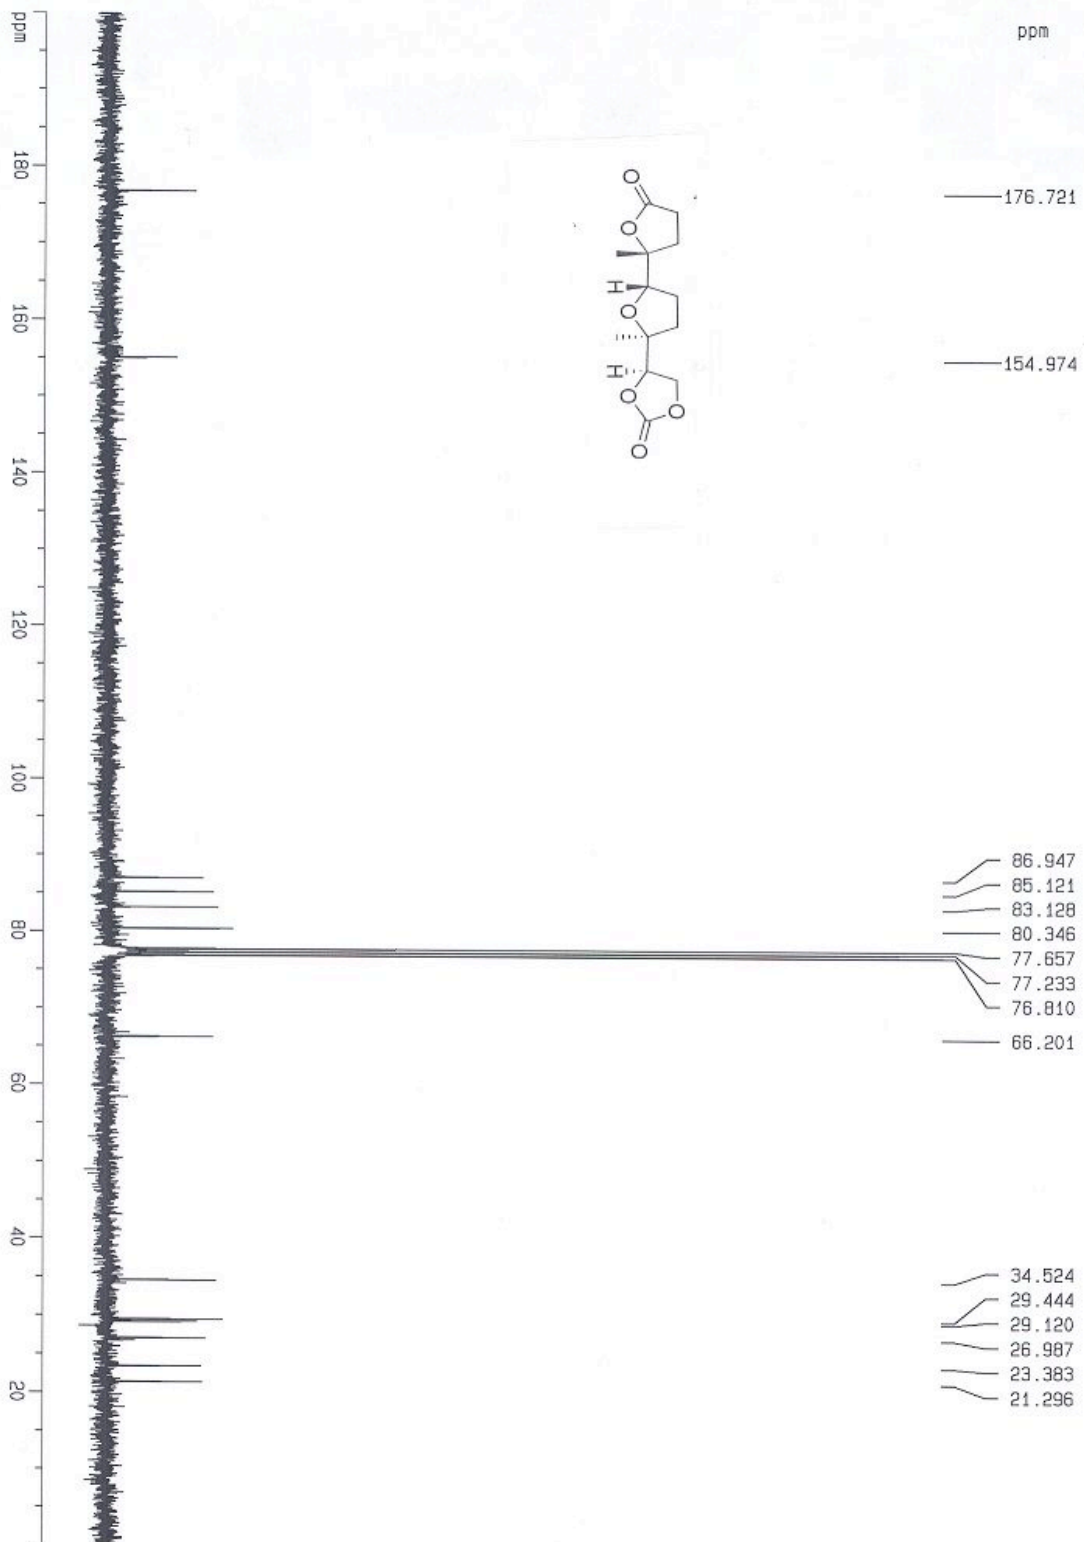

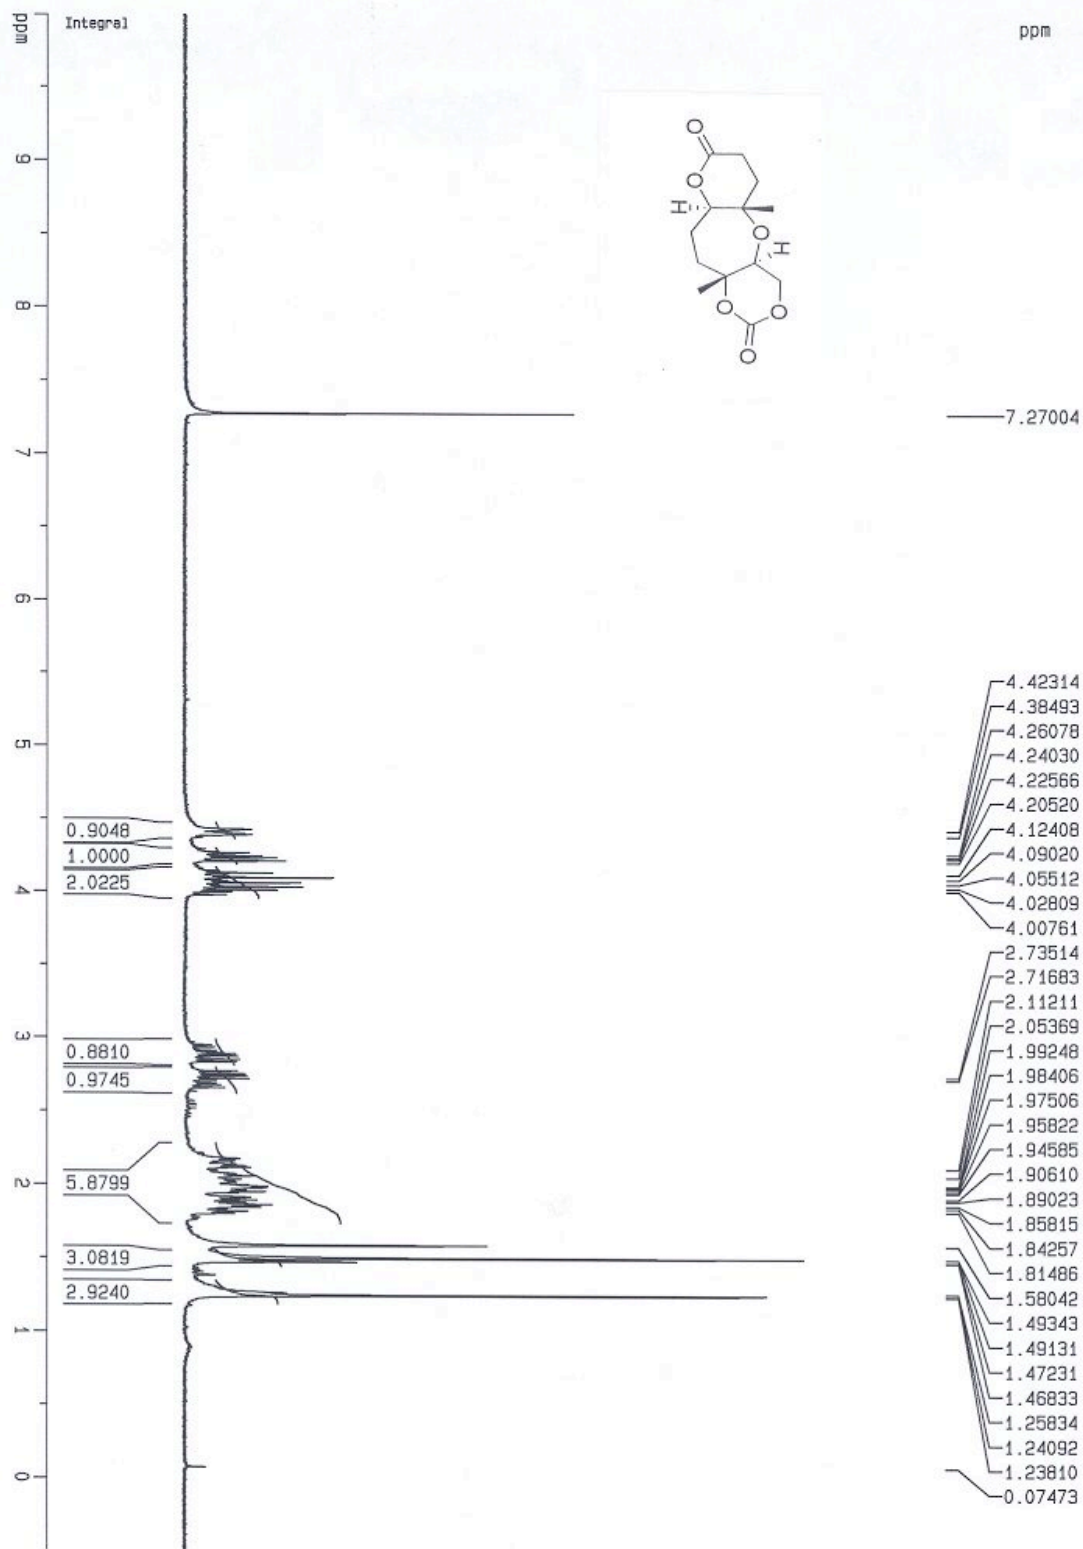

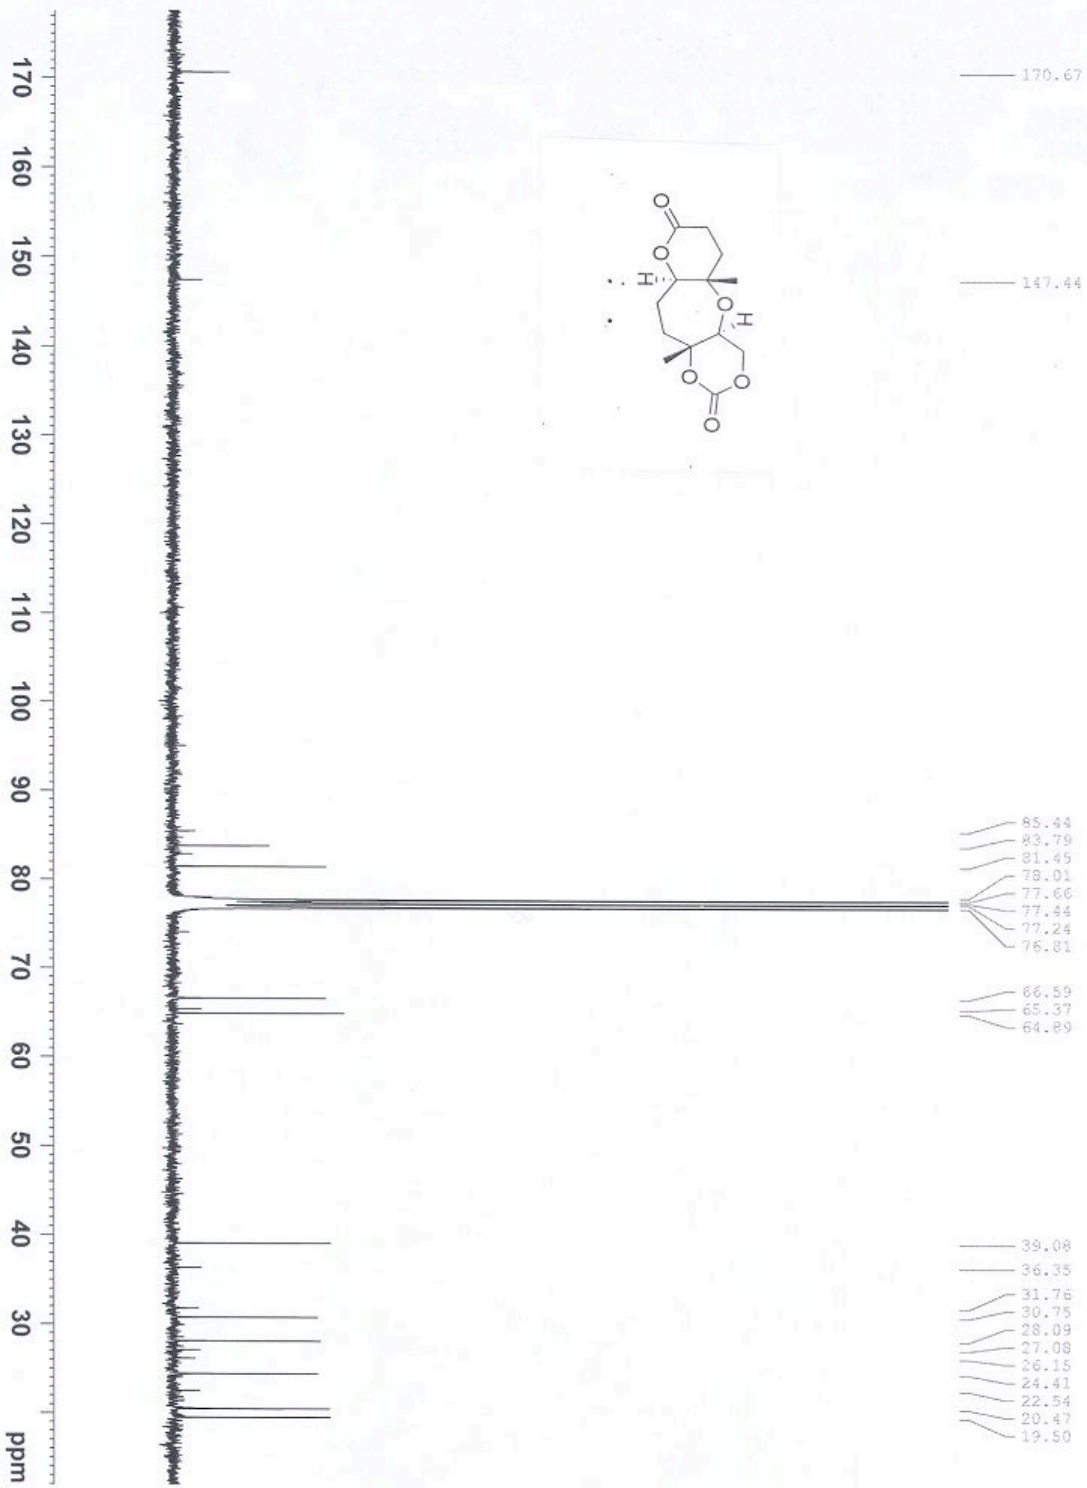

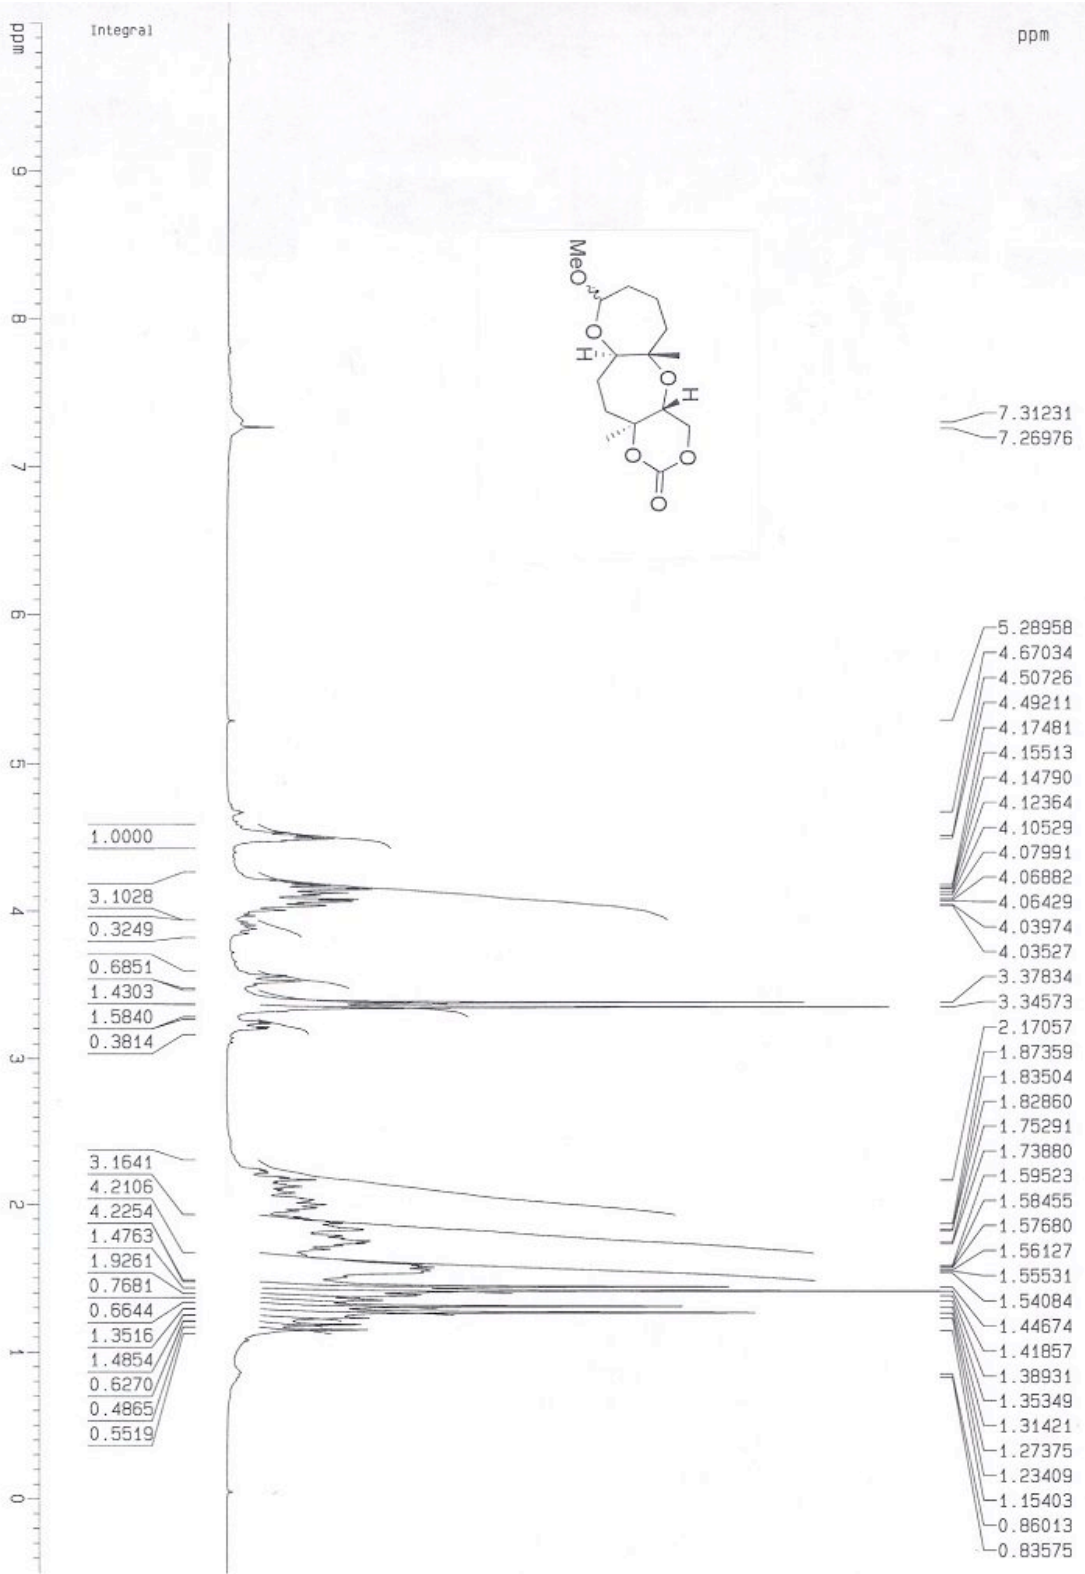



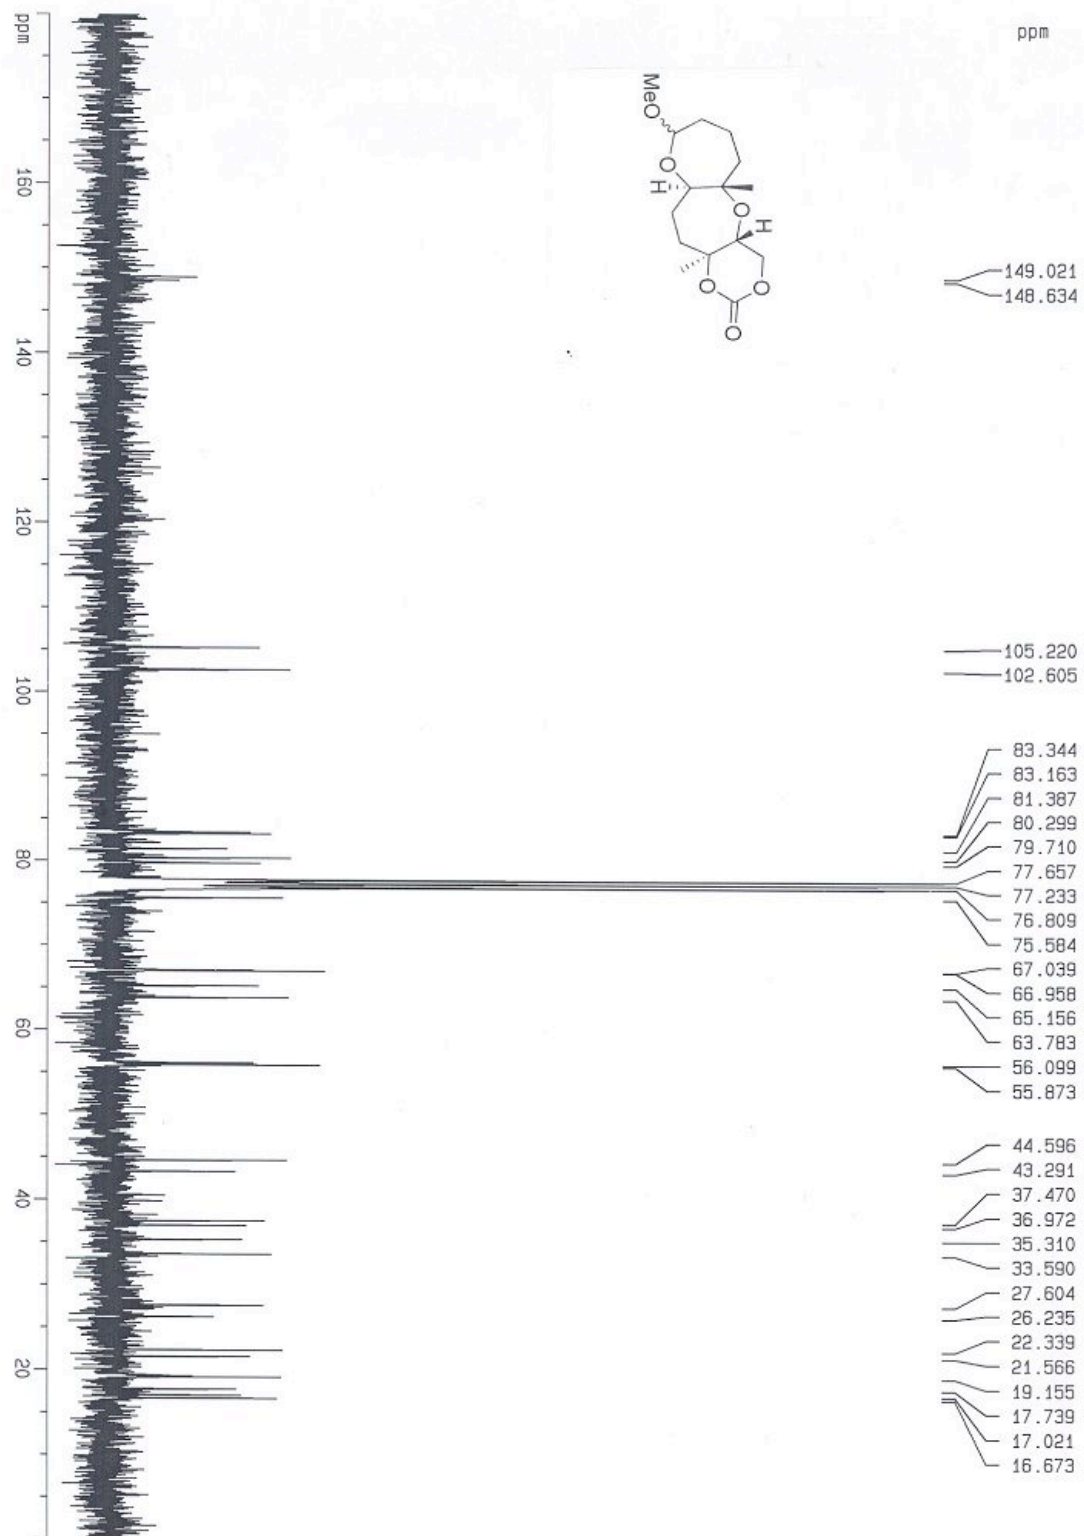

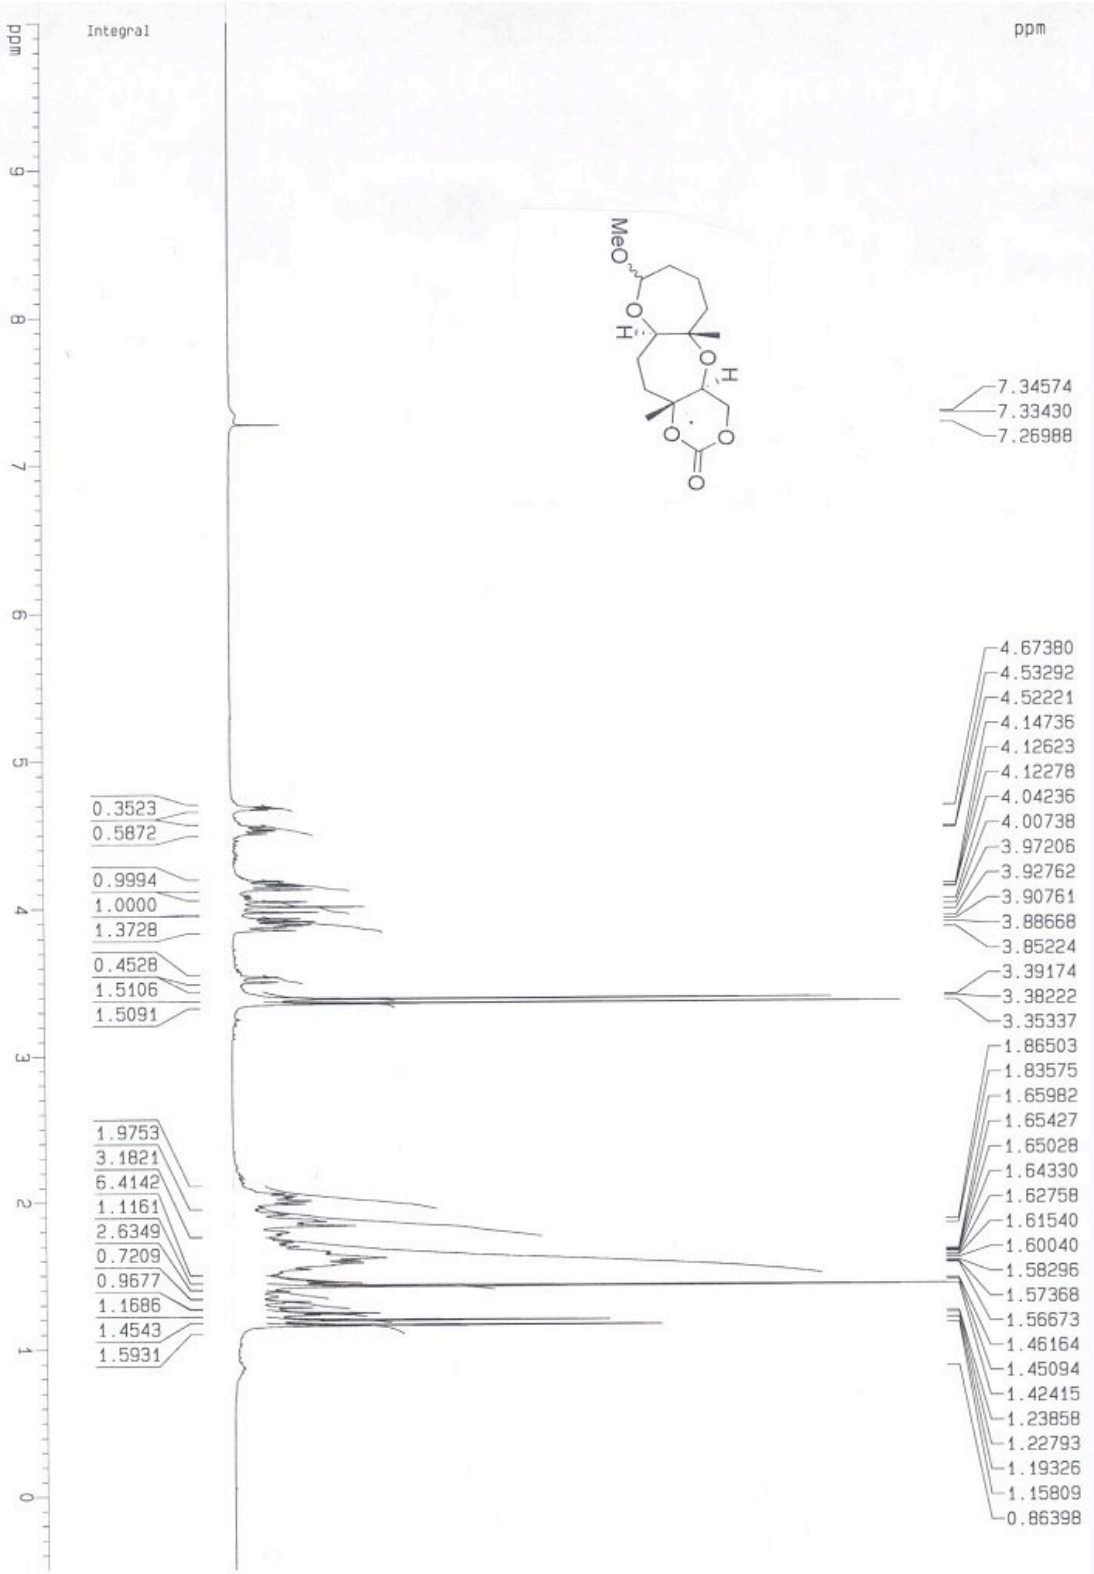

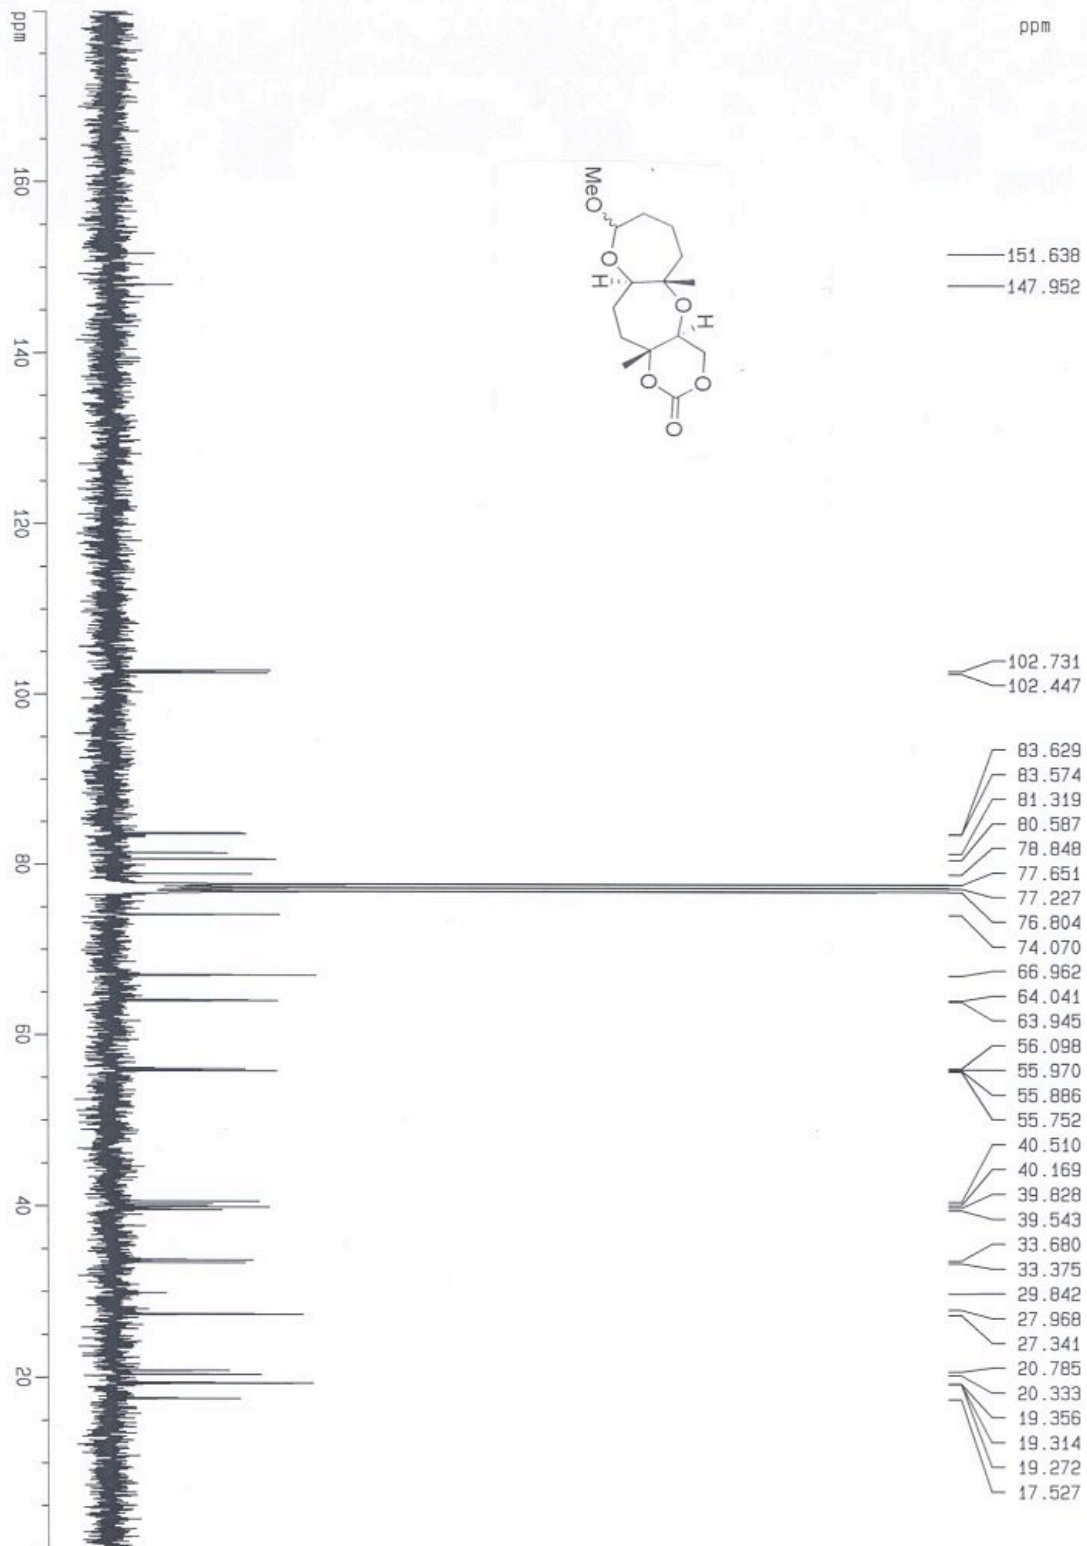

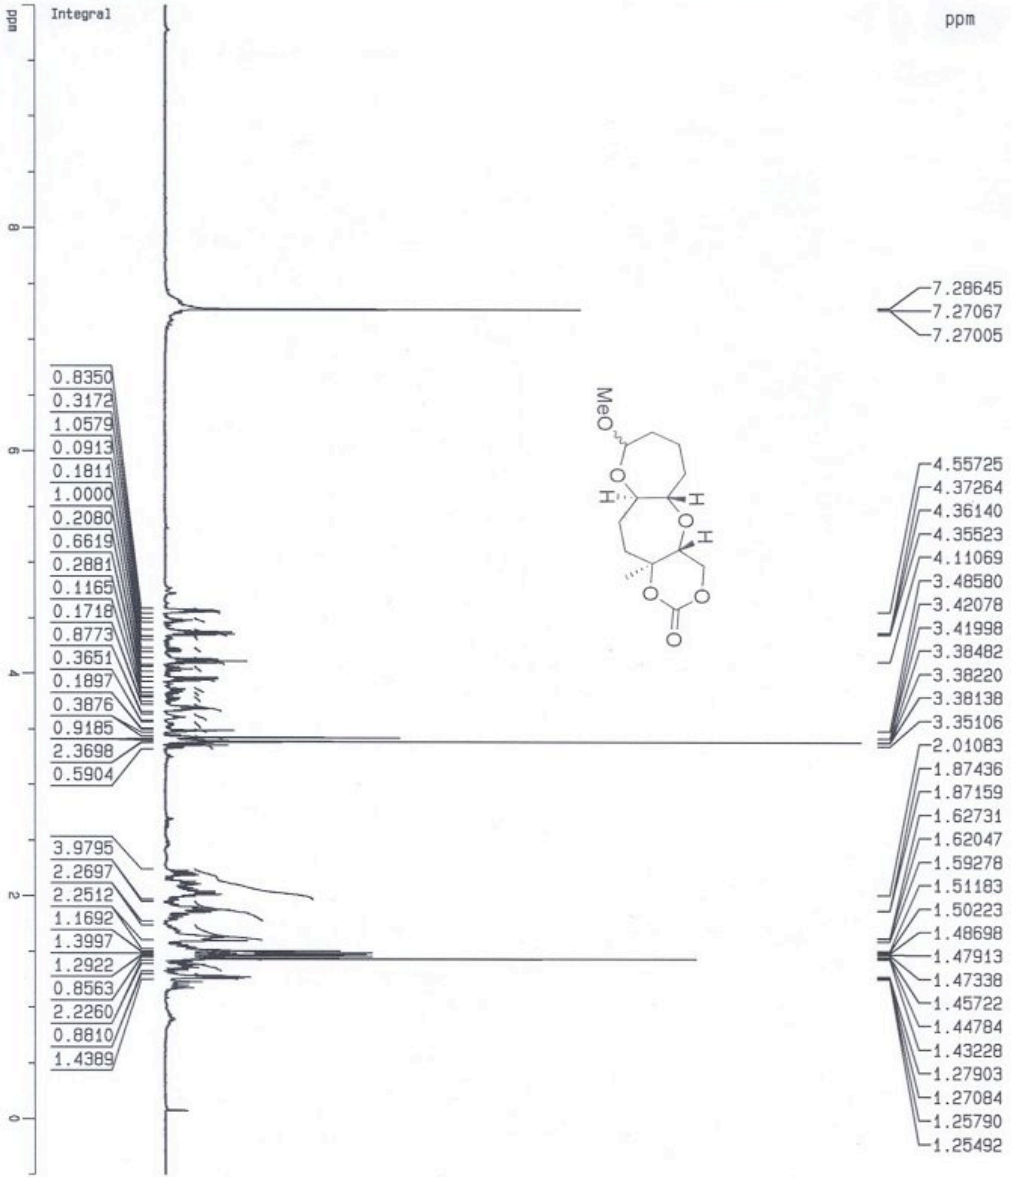

endo, endo acetal 1

Current Data Parameters  
 NAME SM09050601  
 EXPNO 1  
 PROCNO 1

F2 - Acquisition Parameters  
 Date\_ 20060805  
 Time 23.08  
 INSTRUM spect  
 PROBHD 5 mm TBI 1H/  
 PULPROG zg  
 TD 65536  
 SOLVENT CDCl3  
 NS 16  
 DS 0  
 SWH 8992.806 Hz  
 FIDRES 0.137219 Hz  
 AQ 3.6438515 sec  
 RG 114  
 DW 55.600 usec  
 DE 6.00 usec  
 TE 290.0 K  
 D1 2.00000000 sec

----- CHANNEL f1 -----  
 NUC1 1H  
 P1 3.00 usec  
 PL1 0.00 dB  
 SF01 600.8336050 MHz

F2 - Processing parameters  
 SI 65536  
 SF 600.8300261 MHz  
 WDM EM  
 SSB 0  
 LB 0.00 Hz  
 GB 0  
 PC 1.00

1D NMR plot parameters  
 CX 20.00 cm  
 F1P 10.000 ppm  
 F1 6008.30 Hz  
 F2P -0.500 ppm  
 F2 -300.42 Hz  
 PPMCM 0.52500 ppm/cm  
 HZCM 315.43576 Hz/cm

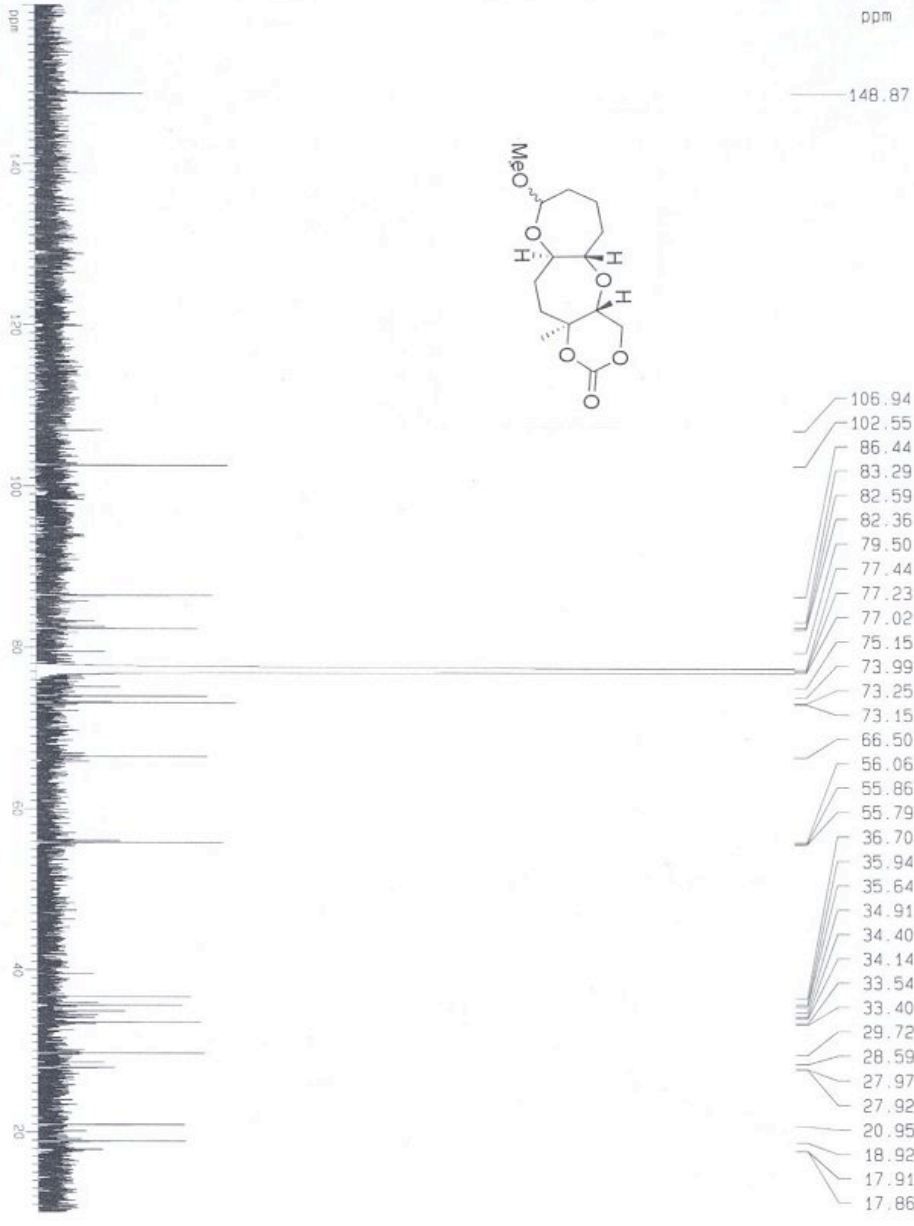

F2 - Acquisition Parameters  
 Date\_ 20060905  
 Time 23.19  
 INSTRUM spect  
 PROBHD 5 mm TAI 1H/  
 PULPROG zgpg  
 TO 65536  
 SOLVENT CDCl3  
 NS 5186  
 DS 0  
 SMH 37878.789 HZ  
 FIDRES 0.577984 HZ  
 AQ 0.9651252 sec  
 RG 32768  
 DN 13.200 usec  
 DE 6.00 usec  
 TE 290.0 K  
 D1 8.00000000 sec  
 d11 0.03000000 sec  
 d12 0.00002000 sec

==== CHANNEL f1 =====  
 NUC1 13C  
 P1 10.00 usec  
 PL1 0.00 dB  
 SF01 151.0953827 MHz

==== CHANNEL f2 =====  
 CPDPRG2 waltz16  
 NUC2 1H  
 PCPD2 100.00 usec  
 PL2 0.00 dB  
 PL12 12.00 dB  
 PL13 120.00 dB  
 SF02 600.8336050 MHz

F2 - Processing parameters  
 SI 65536  
 SF 151.0787974 MHz  
 MDW EM  
 SSB 0  
 LB 1.00 HZ  
 GB 0  
 PC 0.85

1D NMR plot parameters  
 CX 20.00 cm  
 F1P 160.000 ppm  
 F1 24172.61 HZ  
 F2P 10.000 ppm  
 F2 1510.79 HZ  
 PRCKM 7.50000 ppm/cm  
 HZCM 1133.09092 HZ/cm

exo, exo tricycl[1]c SM

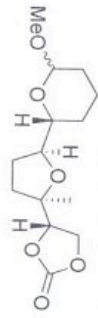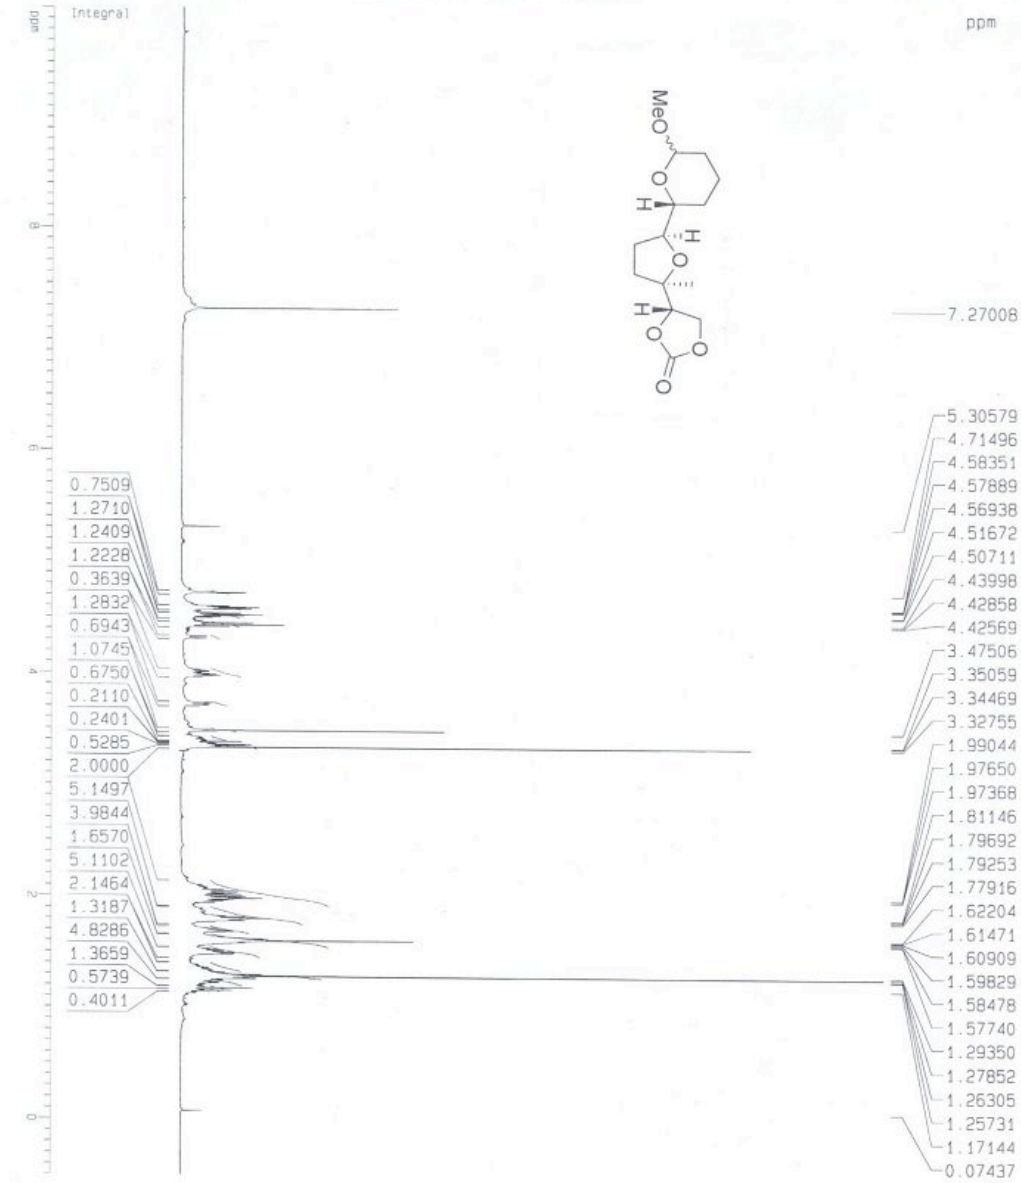

Current Data Parameters  
 NAME SM08050603  
 EXPNO 1  
 PROCNO 1

F2 - Acquisition Parameters:  
 Date\_ 20060806  
 Time 12.12  
 INSTRUM spect  
 PROBHD 5 mm TBI 1H/  
 PULPROG zg  
 TD 65536  
 SOLVENT CDCl3  
 NS 16  
 DS 0  
 SMH 8992.806 Hz  
 FIDRES 0.137219 Hz  
 AQ 3.6438515 sec  
 RG 114  
 DW 55.600 usec  
 DE 6.00 usec  
 TE 250.0 K  
 D1 2.00000000 sec

\*\*\*\*\* CHANNEL f1 \*\*\*  
 NUC1 1H  
 P1 3.00 usec  
 PL1 0.00 dB  
 SF01 600.8336050 MHz

F2 - Processing parameters  
 SI 65536  
 SF 600.8300262 MHz  
 WDW EM  
 SSB 0  
 LB 0.00 Hz  
 GB 0  
 PC 1.00

1D NMR plot parameters  
 CX 20.00 cm  
 F1P 10.000 ppr  
 F1 6008.30 Hz  
 F2P -0.500 ppr  
 F2 -300.42 Hz  
 PPMGCM 0.52500 ppr  
 HZCM 315.43576 Hz



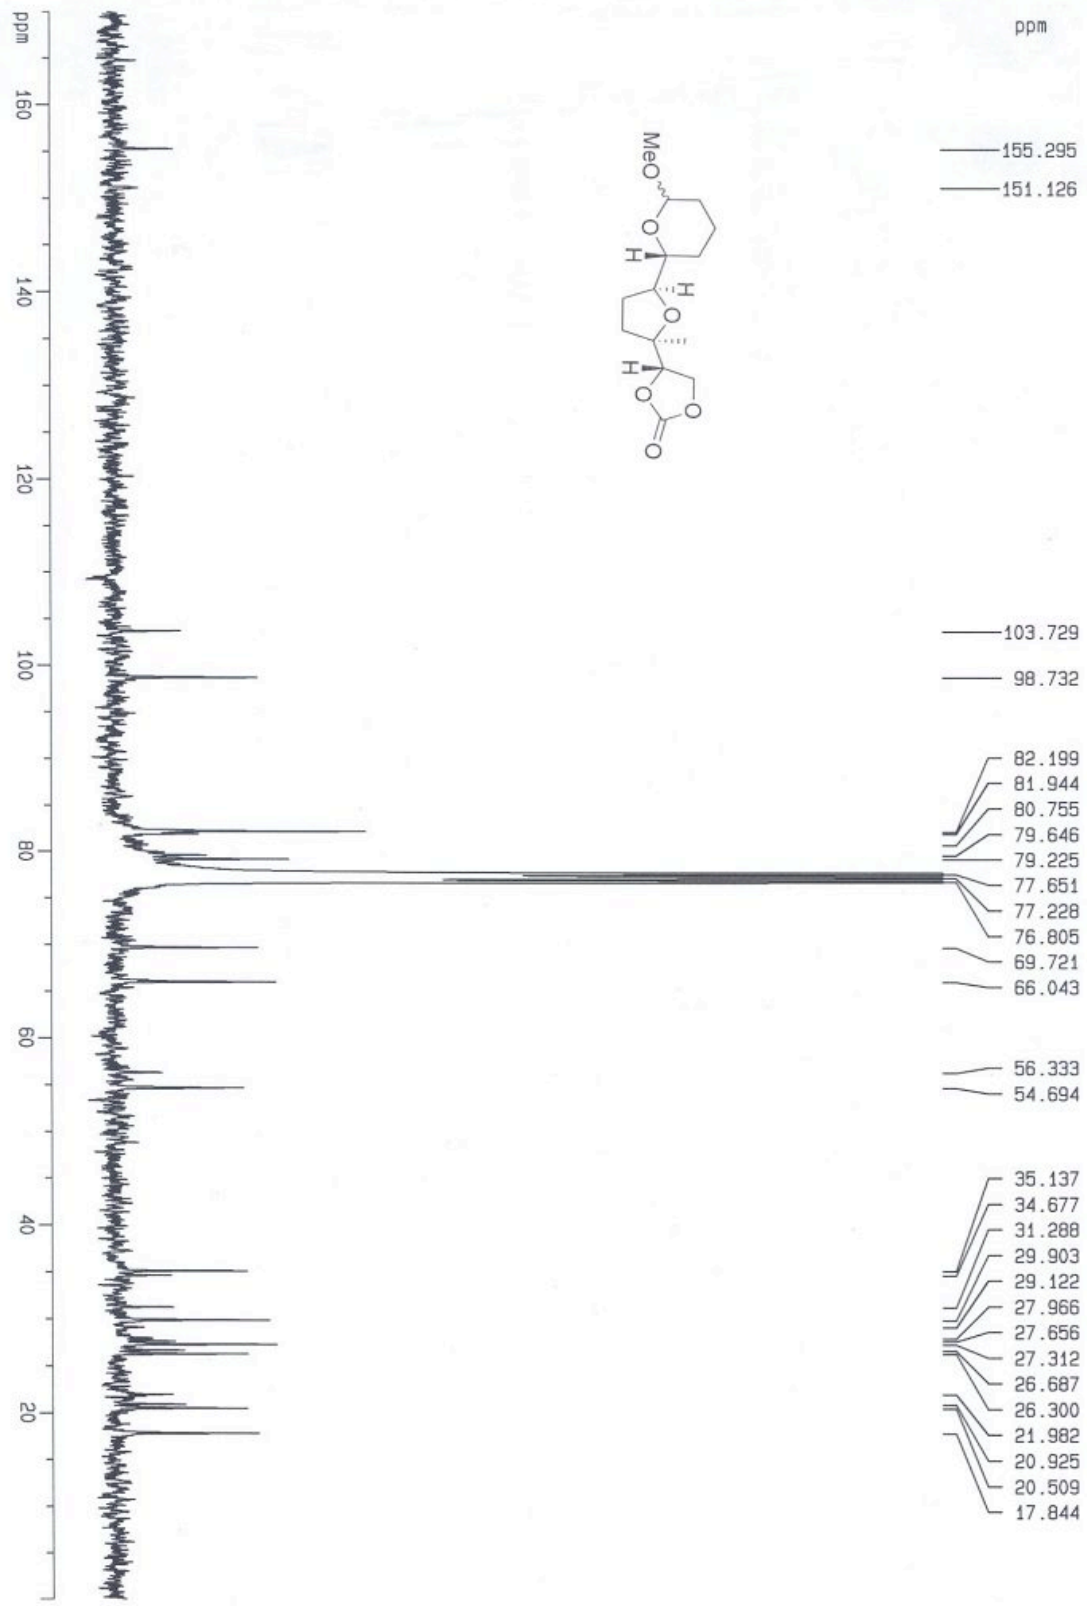

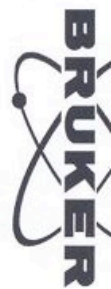

Current Data Parameters  
NAME SW08200603  
EXPNO 1  
PROCNO 1

F2 - Acquisition Parameters  
Date\_ 20060820  
Time 21.37  
INSTRUM spect  
PROBHD 5 mm Multinucl  
PULPROG zg  
TD 65536  
SOLVENT CDCl3  
NS 4  
DS 2  
SWH 10330.578 Hz  
FIDRES 0.157632 Hz  
AQ 3.1719923 sec  
RG 80.6  
DW 48.400 usec  
DE 6.00 usec  
TE 298.2 K  
D1 2.00000000 sec  
TD0 1

==== CHANNEL f1 =====  
NUC1 1H  
P1 9.00 usec  
PL1 0.00 dB  
SF01 500.1330885 MHz  
F2 - Processing Parameters  
SI 32768  
SF 500.1300076 MHz  
WDW EM  
SSB 0  
LB 0.10 Hz  
GB 0  
PC 1.00

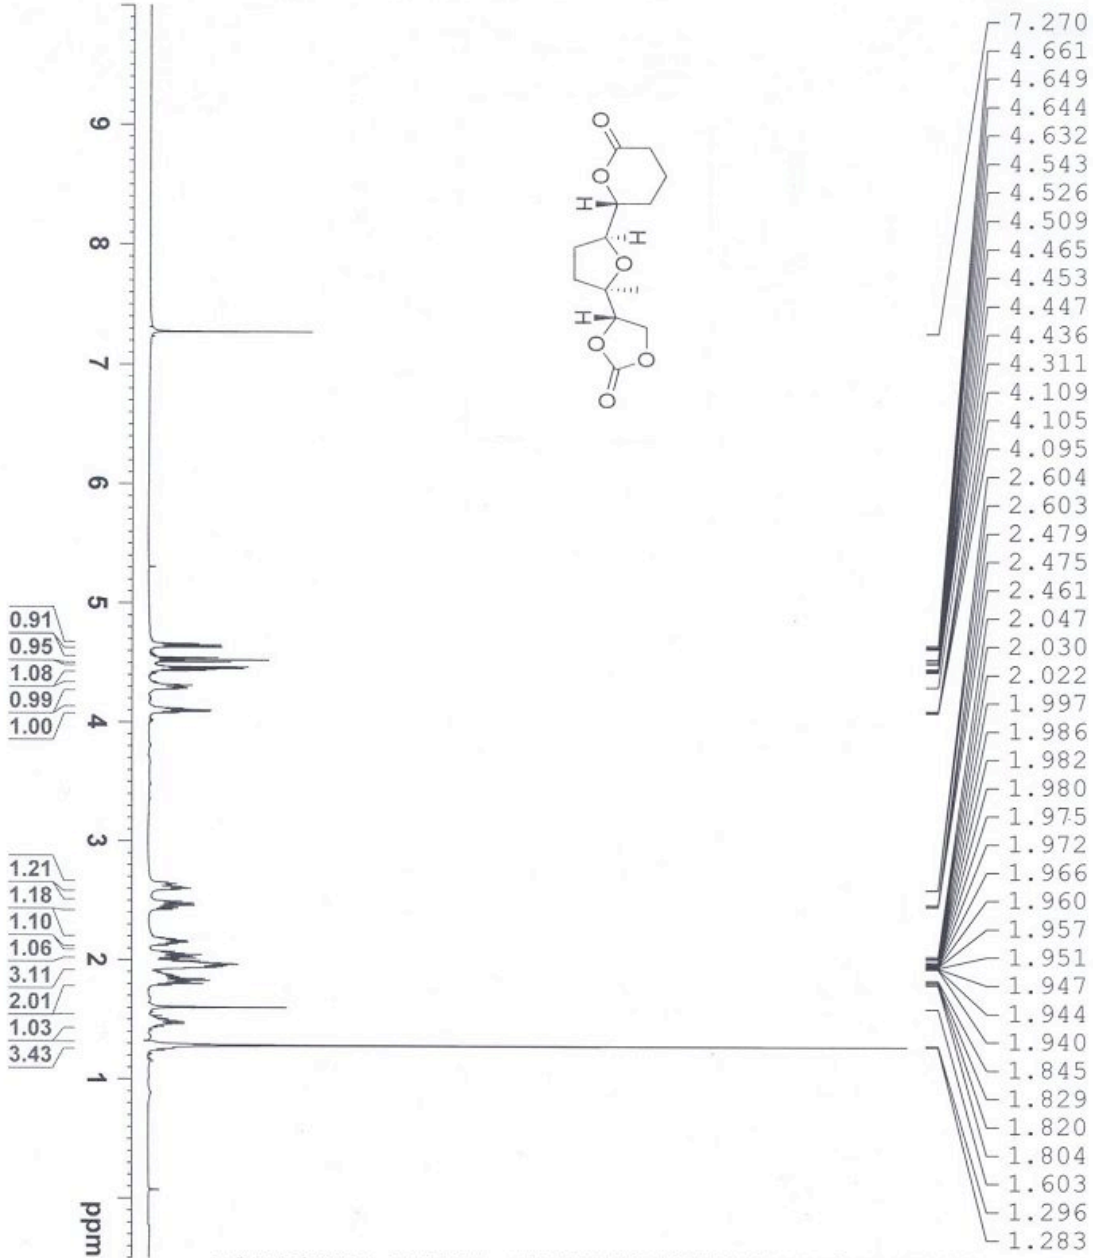



Lactone655 C-13

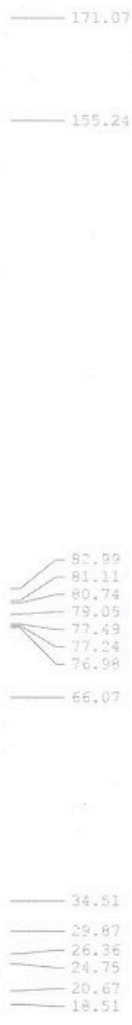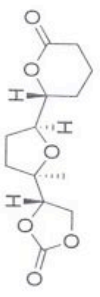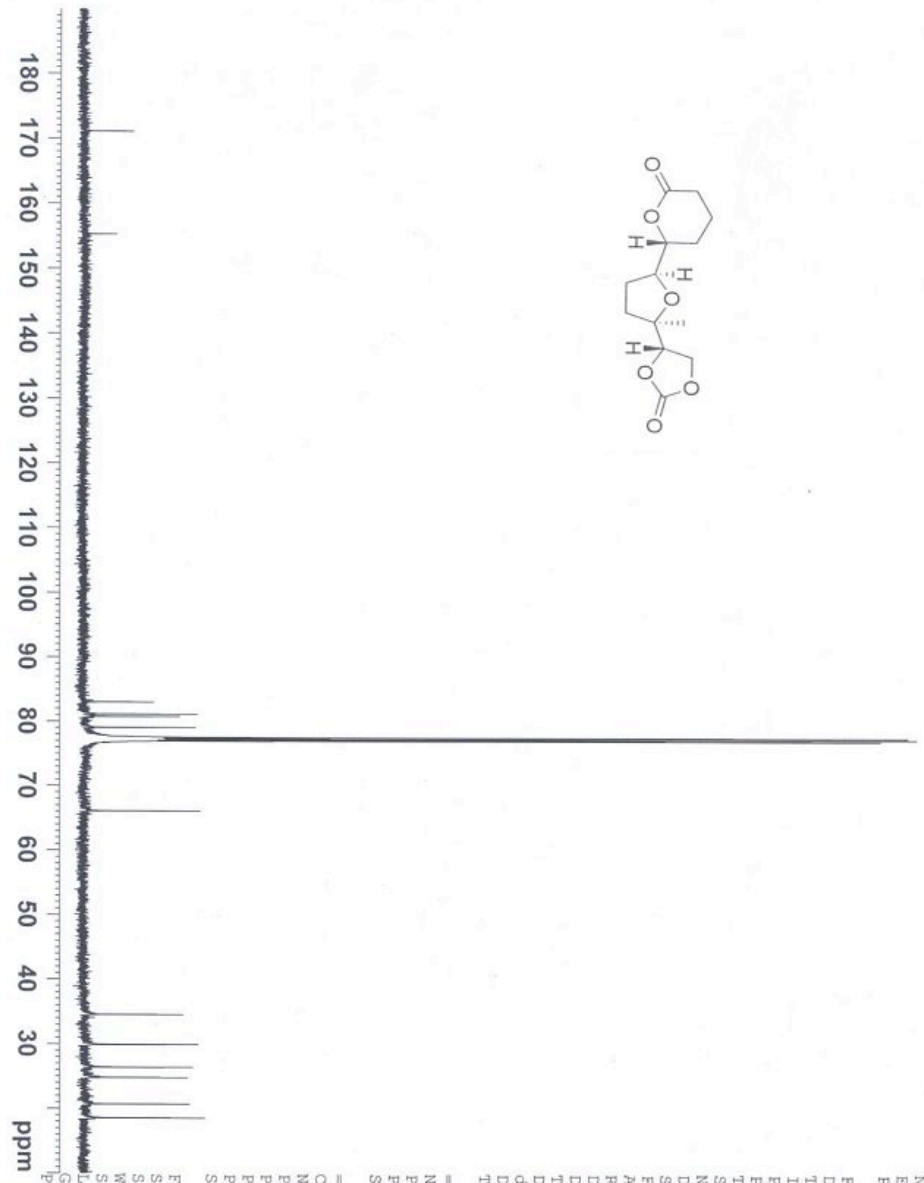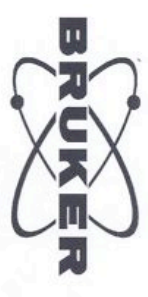

Current Data Parameters  
 NAME Lactone655C13  
 EXNO 1  
 PROCNO 1

F2 - Acquisition Parameters  
 Date\_ 20060825  
 Time\_ 14.13  
 INSTRUM spect  
 PROBHD 5 mm Multinucl  
 FULPROG zgpg  
 TD 65536  
 SOLVENT CDCl3  
 NS 9400  
 DS 2  
 SMH 30030.029 Hz  
 FIDRES 0.458222 Hz  
 AQ 1.0912249 sec  
 RG 8192  
 DW 16.650 usec  
 DE 6.00 usec  
 TE 298.2 K  
 D1 6.00000000 sec  
 d11 0.03000000 sec  
 DELTA 5.90000010 sec  
 TDO 1

===== CHANNEL f1 =====  
 NUC1 13C  
 P1 11.00 usec  
 PL -2.00 dB  
 SFO1 125.7703643 MHz

===== CHANNEL f2 =====  
 CPDPRG2 waltz16  
 NUC2 1H  
 PCPD2 100.00 usec  
 PL2 20.00 dB  
 PL12 20.00 dB  
 PL13 20.00 dB  
 SFO2 500.1320005 MHz

F2 - Processing parameters  
 SI 32768  
 SF 125.7577638 MHz  
 WDW EM  
 SSB 0  
 LB 1.00 Hz  
 GB 0  
 PC 1.40

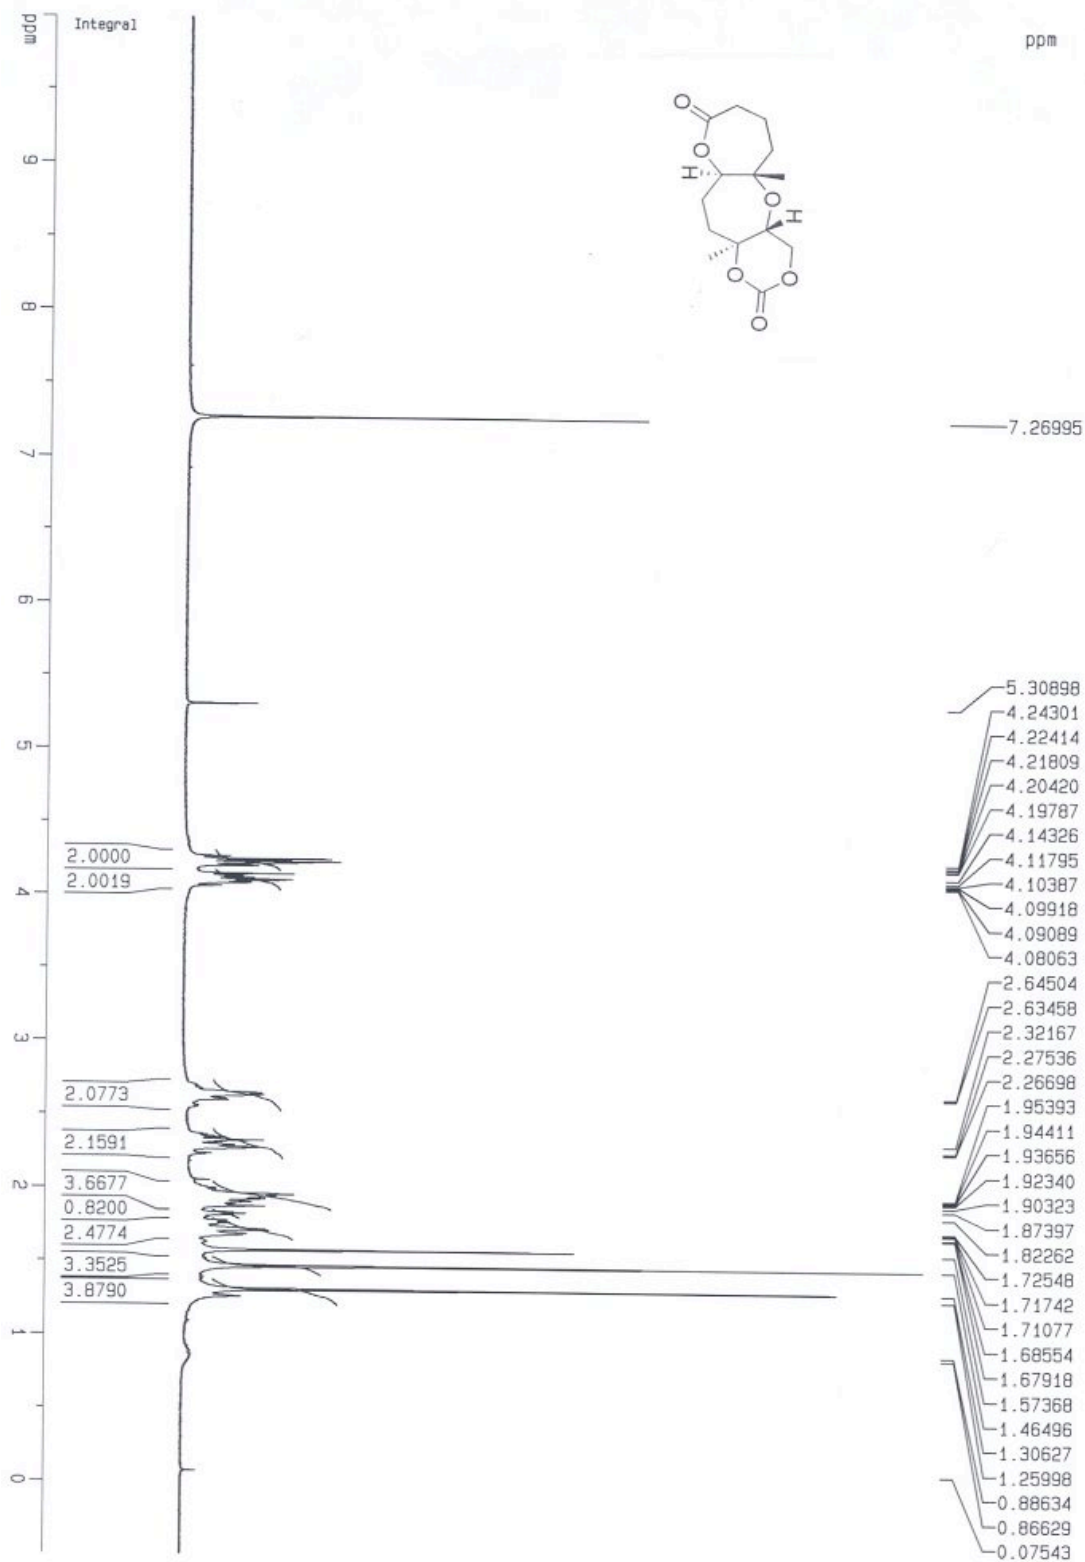

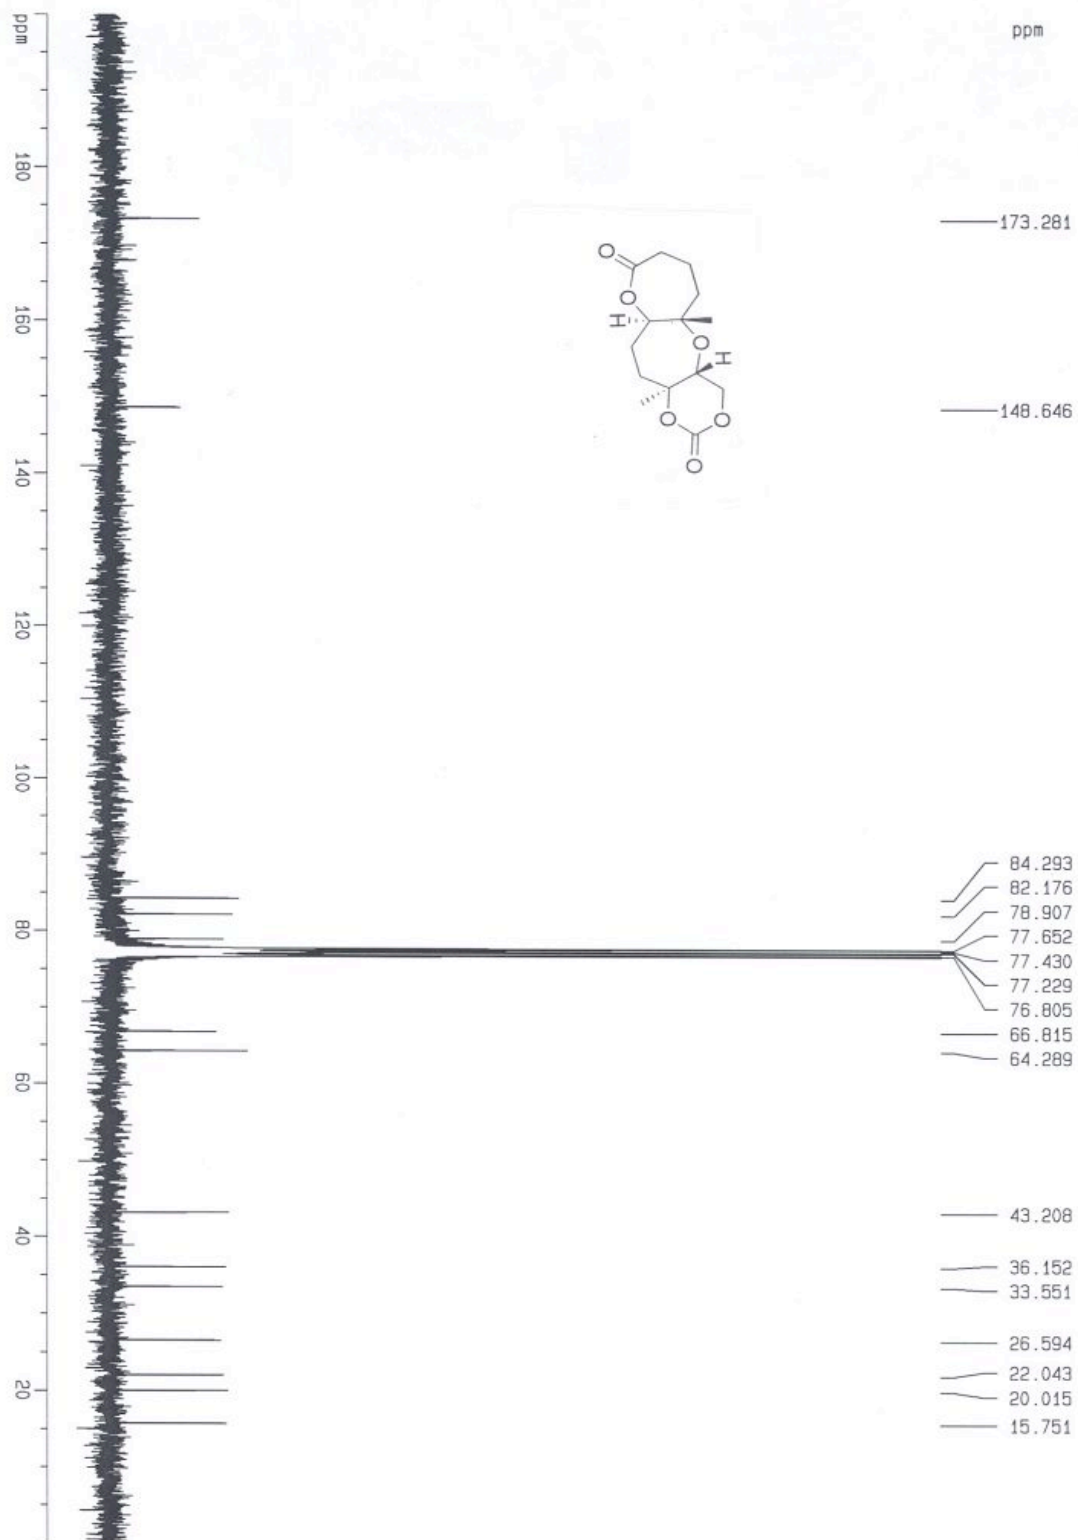

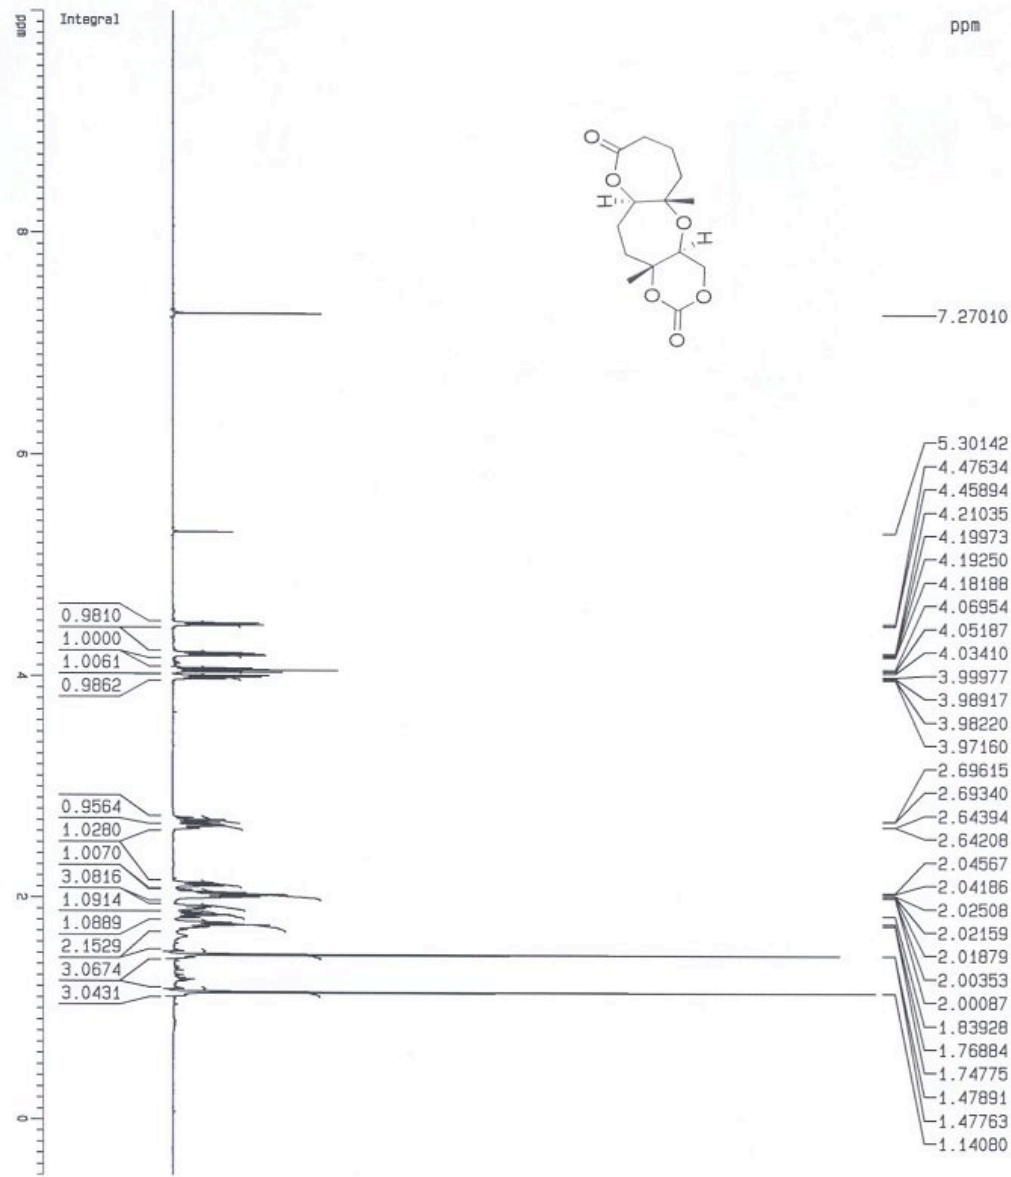

Current Data Parameters

NAME SW776H

EXPNO 1

PROCNO 1

F2 - Acquisition Parameters

Date\_ 20060603

Time 13.13

INSTRUM spect

PROBHD 5 mm TBI 1H/

PULPROG zg

TD 65536

SOLVENT CDCl3

NS 8

DS 0

SWH 8992.806 Hz

FIDRES 0.137219 Hz

AQ 3.6438515 sec

RG 101.6

DW 55.600 usec

DE 6.00 usec

TE 290.0 K

D1 2.00000000 sec

----- CHANNEL f1 -----

NUC1 1H

P1 3.00 usec

PL1 0.00 dB

SFO1 600.8336050 MHz

F2 - Processing parameters

SF 600.8300265 MHz

SI 65536

MDM EM

SSB 0

LB 0.00 Hz

GB 0

PC 1.00

1D NMR plot parameters

CX 20.00 cm

F1P 10.000 ppm

F1 6008.30 Hz

F2P -0.500 ppm

F2 -300.42 Hz

PRMCM 0.52500 ppm/cm

HZCM 315.43576 Hz/cm

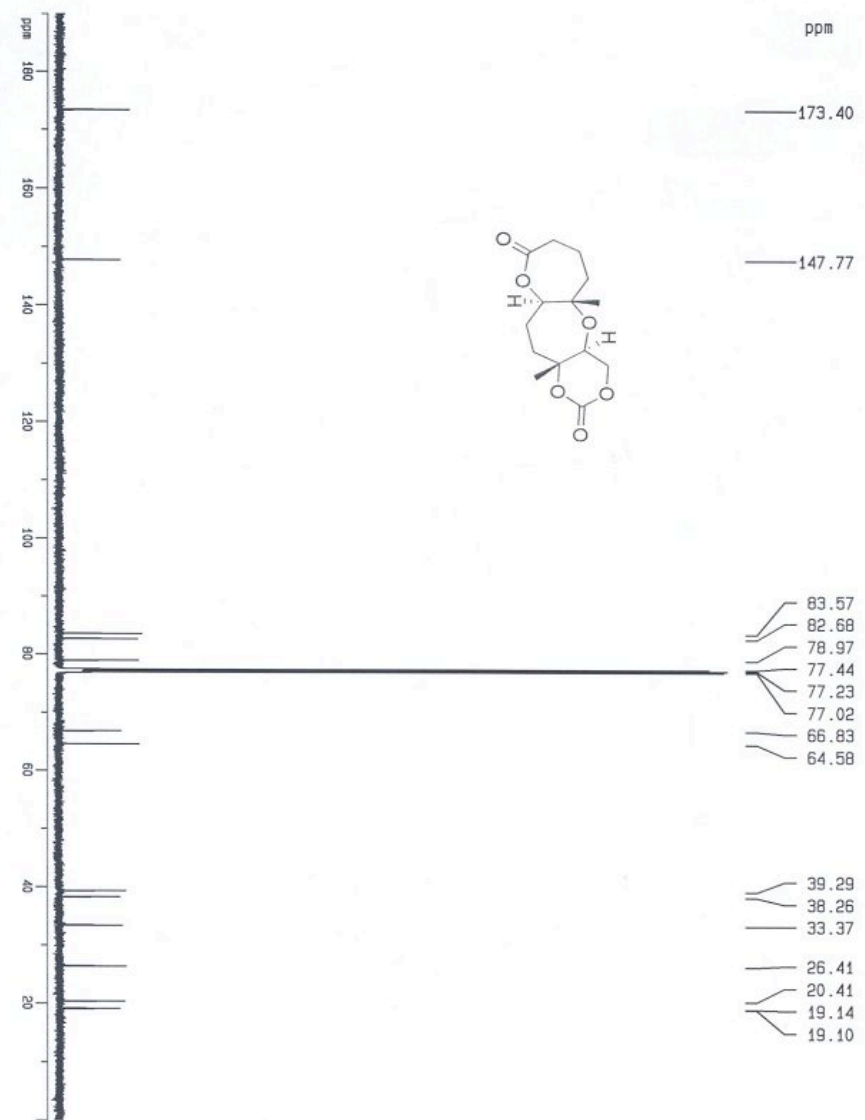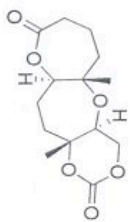

Current Data Parameters  
 NAME SW776C13  
 EXPNO 1  
 PROCNO 1

F2 - Acquisition Parameters  
 Date\_ 20060603  
 Time 13.40  
 INSTRUM spect  
 PROBRD 5 mm TB1 1H/  
 PULPROG zgpg  
 TD 65536  
 SOLVENT CDCl3  
 NS 779  
 DS 0  
 SWH 37878.769 Hz  
 FIDRES 0.577984 Hz  
 AQ 0.8651252 sec  
 RG 32768  
 DW 13.200 usec  
 DE 6.00 usec  
 TE 290.0 K  
 D1 8.00000000 sec  
 d11 0.03000000 sec  
 d12 0.00002000 sec

CHANNEL f1  
 NUC1 13C  
 P1 10.00 usec  
 PL1 0.00 dB  
 SF01 151.0953827 MHz

CHANNEL f2  
 CPDPRG2 waltz16  
 NUC2 1H  
 PCPD2 100.00 usec  
 PL2 0.00 dB  
 PL12 12.00 dB  
 PL13 120.00 dB  
 SF02 600.8338050 MHz

F2 - Processing parameters  
 SI 65536  
 SF 151.0788008 MHz  
 KDM EM  
 SSB 0  
 LB 1.00 Hz  
 GB 0  
 PC 1.00

10 MHz plot parameters  
 CX 20.00 cm  
 F1P 190.000 ppm  
 F1 29704.97 Hz  
 F2P 0.000 ppm  
 F2 0.00 Hz  
 PPMCM 9.50000 ppm/cm  
 HZCM 1435.24854 Hz/cm

776-lactone from internal diepoxide SW

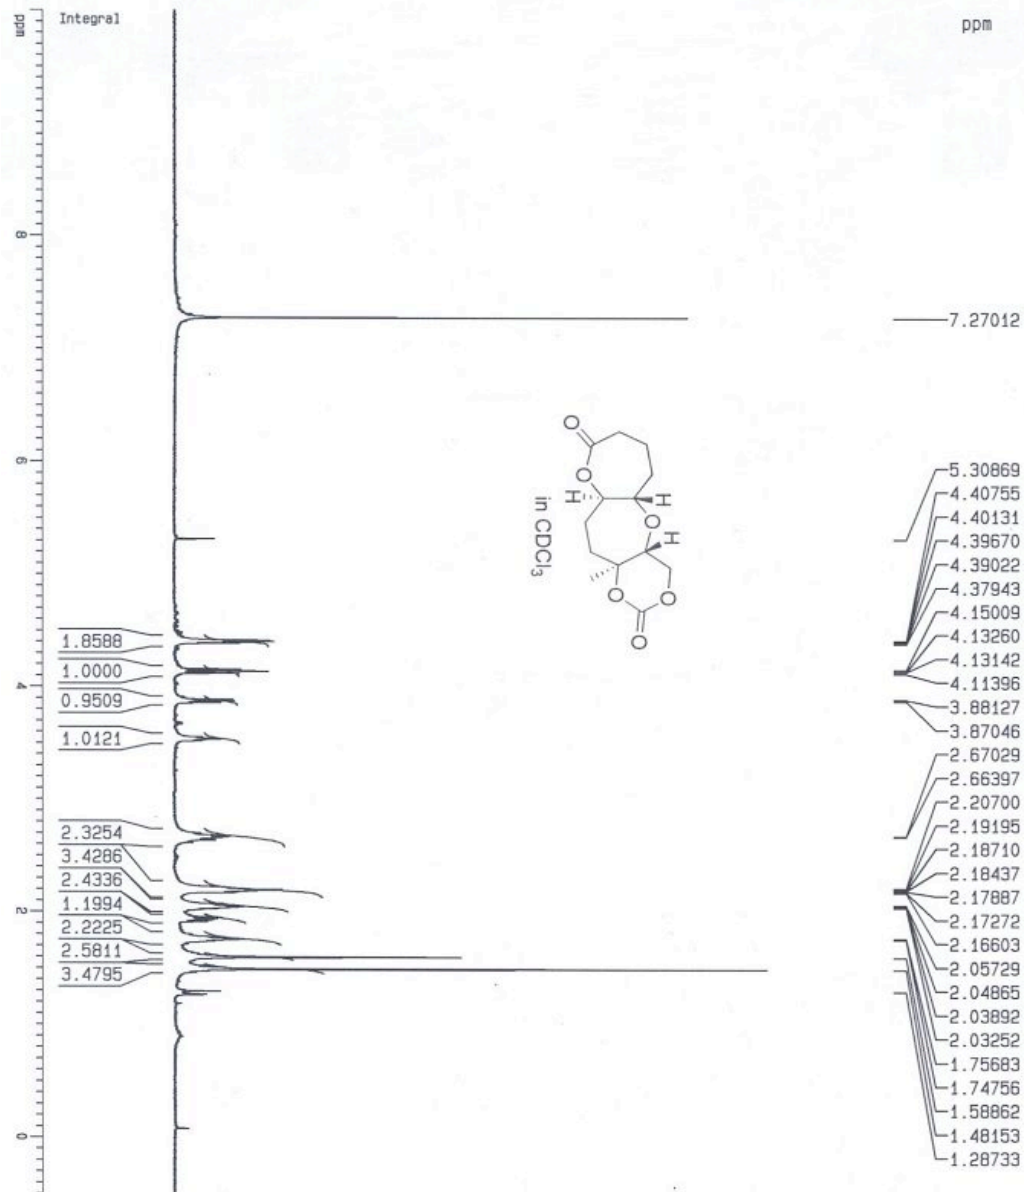

```

Current Data Parameters
NAME          SM08070602
EXPNO        1
PROCNO       1

F2 - Acquisition Parameters
Date_        20060807
Time         15.51
INSTRUM     spect
PROBHD      5 mm TBI 1H/
PULPROG     zg
TD           65536
SOLVENT     CDCl3
NS           32
DS           0
SWH          8992.806 Hz
FIDRES       0.137219 Hz
AQ           3.6438515 sec
RG           322.5
DM           55.600 usec
DE           6.00 usec
TE           290.0 K
D1           2.00000000 sec

----- CHANNEL f1 -----
NUC1         1H
P1           3.00 usec
PL1          0.00 dB
SFO1         600.8336050 MHz

F2 - Processing parameters
SI           65536
SF           600.8330262 MHz
WDW          EM
SSB          0
LB           0.00 Hz
GB           0
PC           1.00

1D NMR plot parameters
CX           20.00 cm
F1P          10.000 ppm
F1           6008.30 Hz
F2P          -0.500 ppm
F2           -300.42 Hz
PPMCKM      0.52500 ppm/cm
HZCKM       315.43576 Hz/cm
    
```

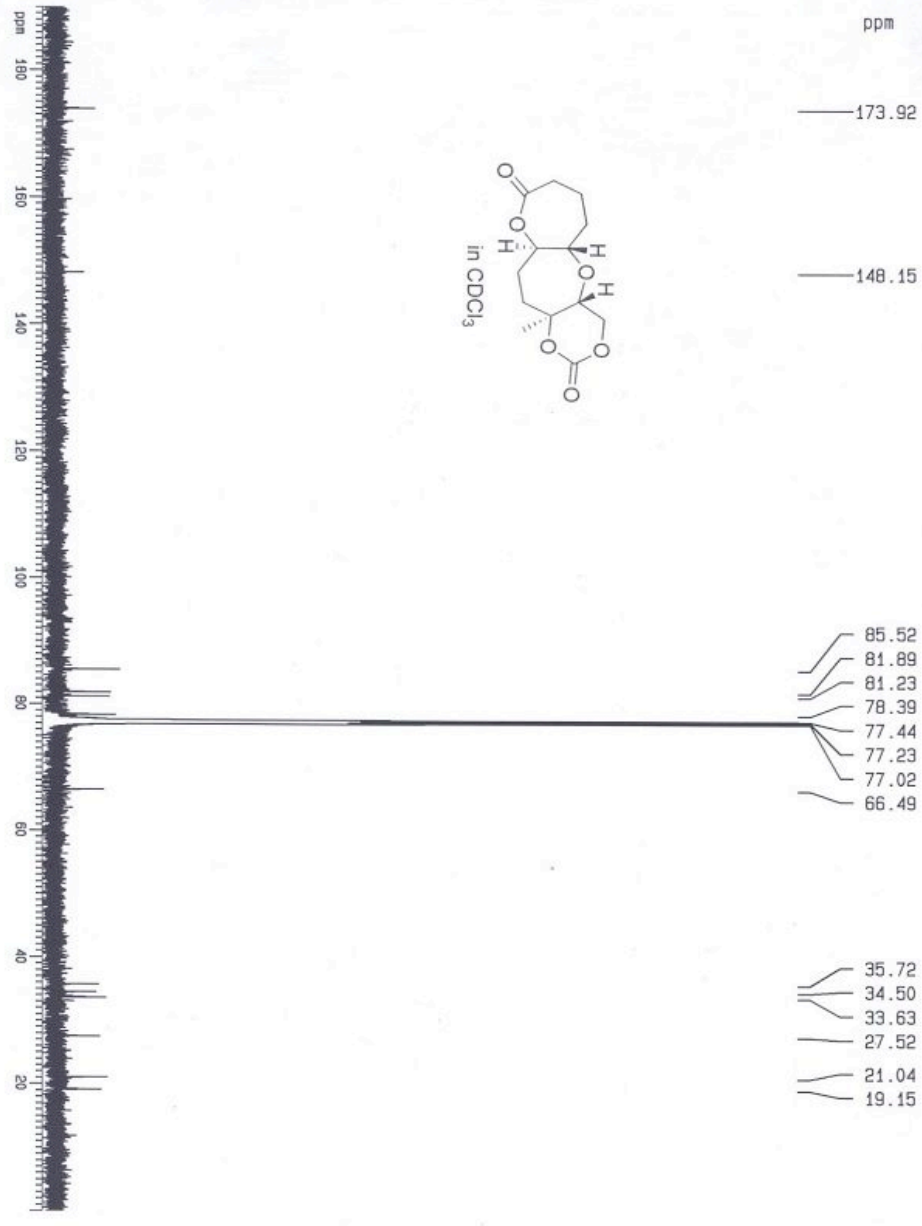

F2 - Acquisition Parameters  
 Date\_ 20060807  
 Time 16.09  
 INSTRUM spect  
 PROBHD 5 mm TBI 1H/  
 PULPROG zgpg  
 TD 65536  
 SOLVENT CDCl3  
 NS 6000  
 DS 0  
 SMH 37878.789 Hz  
 FIDRES 0.577984 Hz  
 AQ 0.9851252 sec  
 RG 32768  
 DM 13.200 usec  
 DE 6.00 usec  
 TE 290.0 K  
 D1 8.00000000 sec  
 d11 0.03000000 sec  
 d12 0.00020000 sec

===== CHANNEL f1 =====  
 NUC1 13C  
 P1 10.00 usec  
 PL1 0.00 dB  
 SF01 151.0953827 MHz

===== CHANNEL f2 =====  
 CPDPRG2 waltz16  
 NUC2 1H  
 PCPD2 100.00 usec  
 PL2 0.00 dB  
 PL12 12.00 dB  
 PL13 120.00 dB  
 SF02 600.8336050 MHz

F2 - Processing parameters  
 SI 65536  
 SF 151.0787985 MHz  
 KHM EM  
 SSB 0  
 LB 1.00 Hz  
 GB 0  
 PC 1.00

1D NMR plot parameters  
 CX 20.00 cm  
 F1P 190.000 DPM  
 F1 28704.97 Hz  
 F2P 0.000 DPM  
 F2 0.00 Hz  
 PPKCM 9.50000 DPM/cm  
 HZCM 1435.24854 Hz/cm



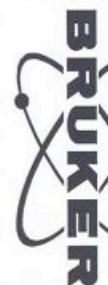

Current Data Parameters  
 NAME SM08200602  
 EXPNO 1  
 PROCNO 1

F2 - Acquisition Parameters  
 Date\_ 20060820  
 Time 21.13  
 INSTRUM spect  
 PROBHD 5 mm Multinucl  
 PULPROG zg  
 TD 65536  
 SOLVENT C6D6  
 NS 4  
 DS 2  
 SWH 10330.578 Hz  
 FIDRES 0.157632 Hz  
 AQ 3.1719923 sec  
 RG 143.7  
 DW 48.400 usec  
 DE 6.00 usec  
 TE 298.2 K  
 D1 2.00000000 sec  
 TD0 1

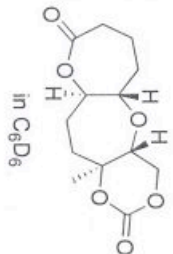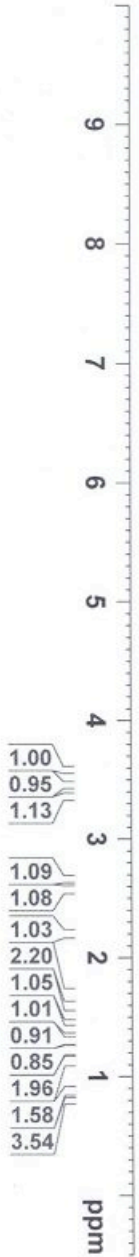

==== CHANNEL f1 =====  
 NUC1 1H  
 P1 9.00 usec  
 PL1 0.00 dB  
 SFO1 500.1330885 MHz

F2 - Processing parameters  
 SI 32768  
 SF 500.1300618 MHz  
 WDW EM  
 SSB 0  
 LB 0.10 Hz  
 GB 0  
 PC 1.00



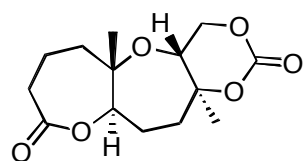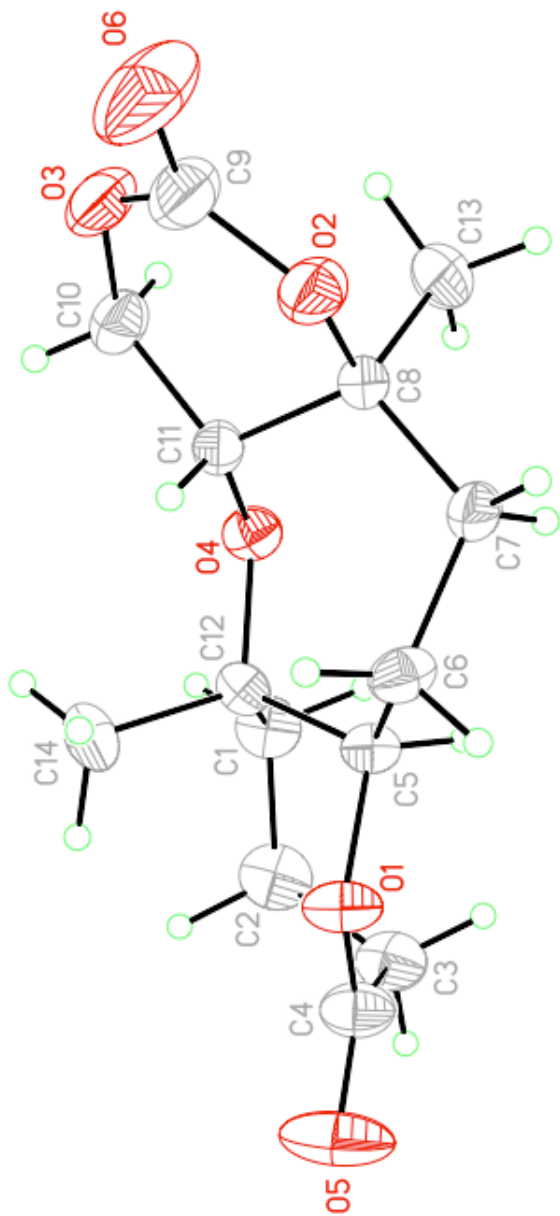

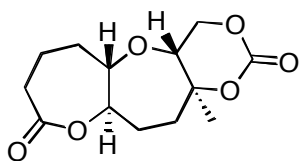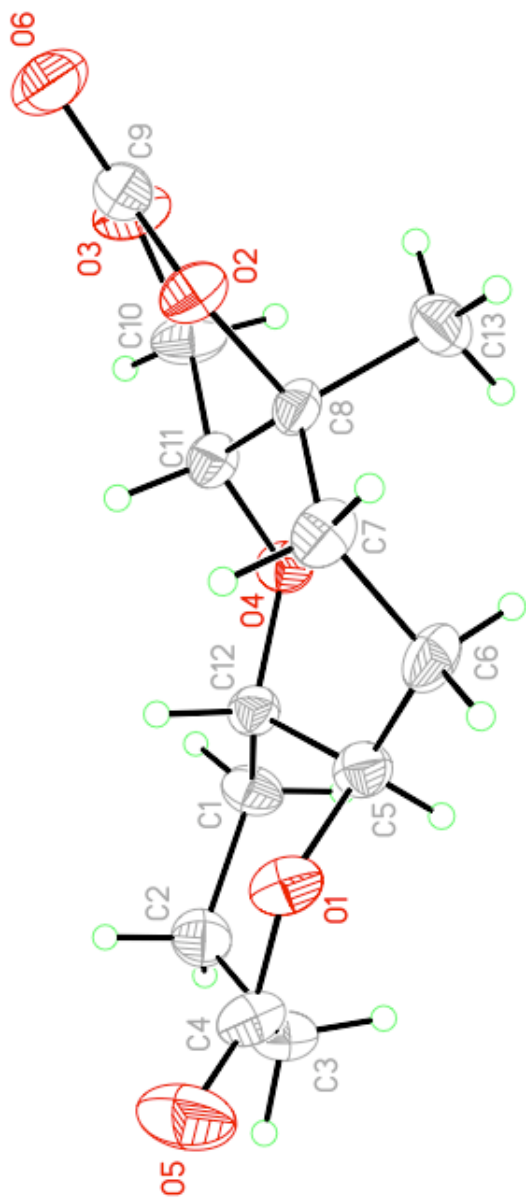

Supplement: NIHMS62449-supplement-si20070409_033.pdf [file NIHMS62449-supplement-si20070409_033.pdf]
